# Supplementary material
Source: publisher figshare collection journal article supplement (https://acs.figshare.com/ndownloader/files/23562326)
Supplement: Supplementary file 1 [file 23562326]

# Discovery of novel selective and orally bioavailable phosphodiesterase-1 inhibitors for the efficient treatment of idiopathic pulmonary fibrosis

Yinuo Wu<sup>#</sup>, Yi-Jing Tian<sup>#</sup>, Mei-Ling Le<sup>#</sup>, Si-Rui Zhang, Chen Zhang, Meng-Xing Huang, Mei-Yan Jiang, Bei Zhang, and Hai-Bin Luo\*

School of Pharmaceutical Sciences, Sun Yat-sen University, Guangzhou 510006, P. R. China

## Table of Contents:

|                                                                                      |    |
|--------------------------------------------------------------------------------------|----|
| 1. Figure S1.....                                                                    | 1  |
| 2. Figure S2.....                                                                    | 1  |
| 3. Stability of <b>3m</b> in the rat liver microsomes.....                           | 5  |
| 4. In vivo pharmacokinetics analysis of <b>3m</b> .....                              | 5  |
| 5. hERG inhibition and humanCYP450 inhibition of <b>3m</b> .....                     | 5  |
| 6. Acute toxicity of compound <b>3m</b> .....                                        | 6  |
| 7. Molecular docking and dynamic simulation.....                                     | 6  |
| 8. <sup>1</sup> HNMR and <sup>13</sup> CNMR spectrums of the targeted compounds..... | 9  |
| 9. The HRMS spectrums of the targeted compounds.....                                 | 23 |
| 10. The purity spectrums of the targeted compounds.....                              | 35 |
| 11. Reference .....                                                                  | 40 |

## 1. Figure S1. Chemical structures of PDE1 inhibitors.

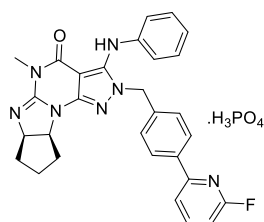

**ITI-214**

PDE1B IC<sub>50</sub>: 0.058 nM  
Selectivity over PDEs: >2759

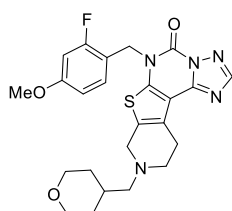

**DNS-0056**

PDE1B IC<sub>50</sub>: 26 nM  
Selectivity over PDEs: >11

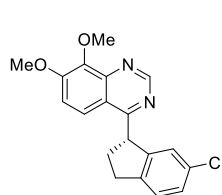

**PF-04822163**

PDE1B IC<sub>50</sub>: 2.4 nM  
PDE1C IC<sub>50</sub>: 7 nM  
Selectivity over PDEs: >105

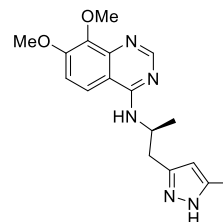

**(S)-PF-04677940**

PDE1B IC<sub>50</sub>: 9 nM  
PDE1C IC<sub>50</sub>: 38 nM  
Selectivity over PDEs: >45

## 2. Figure S2: The binding modes of representative compounds

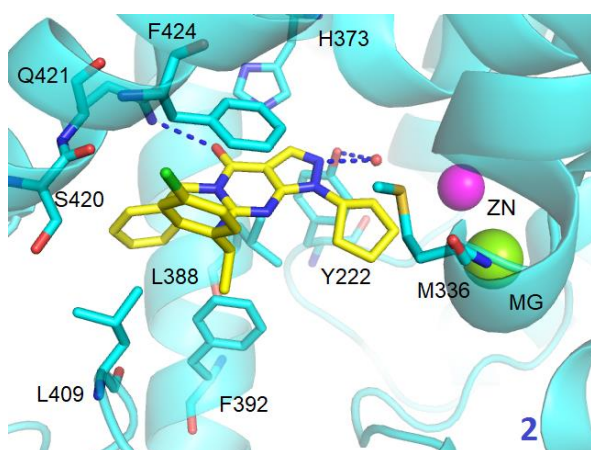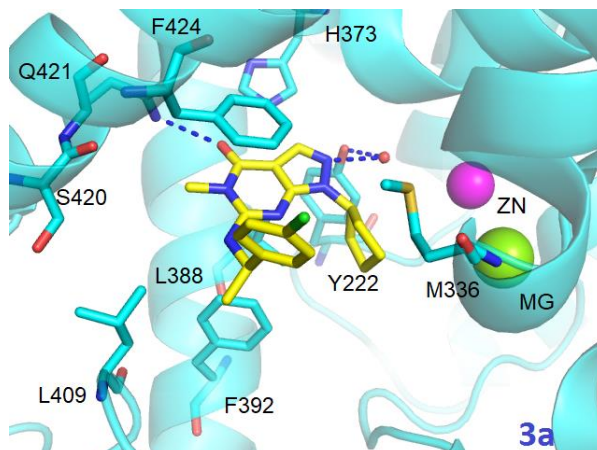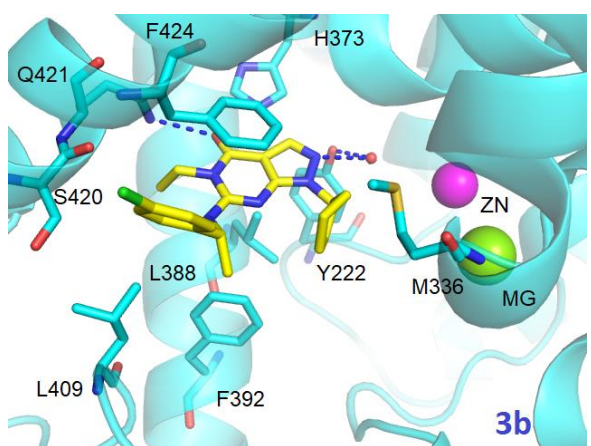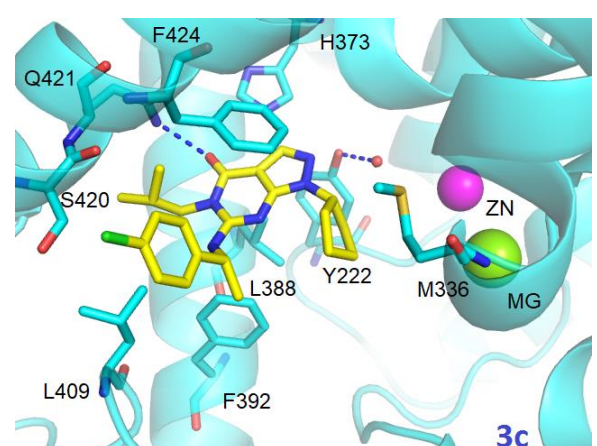

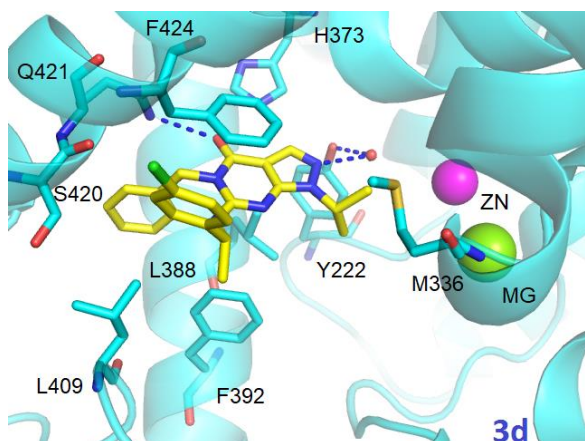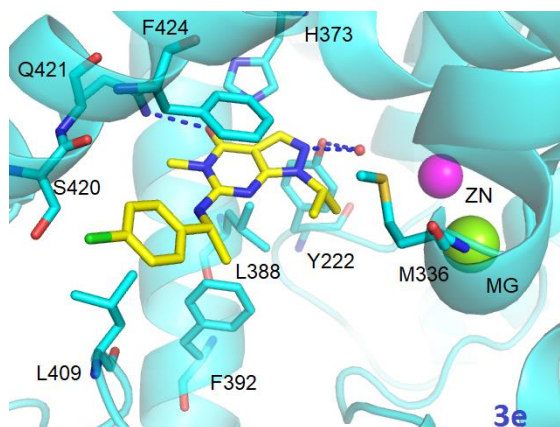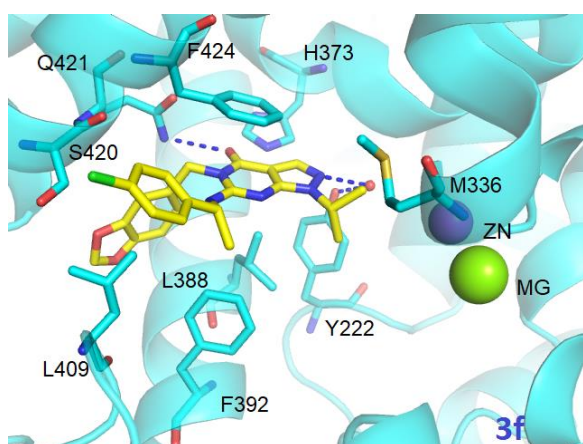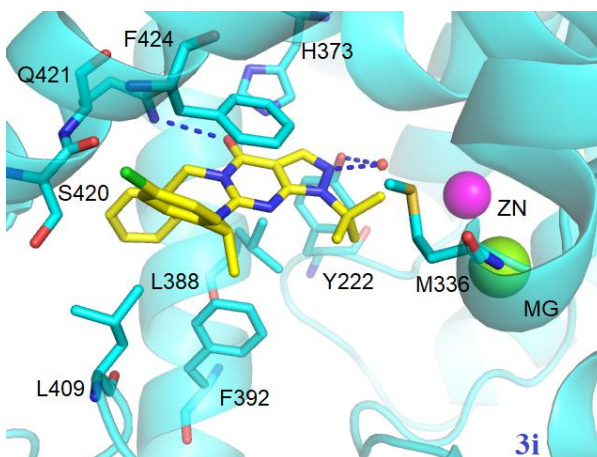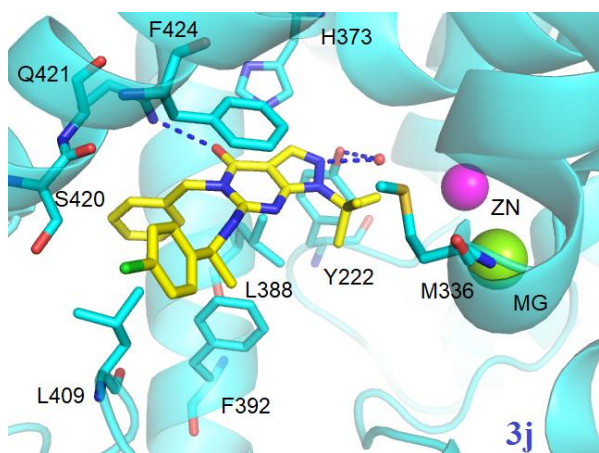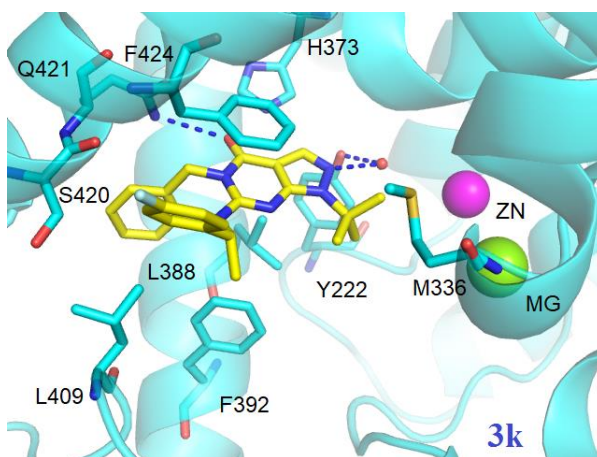



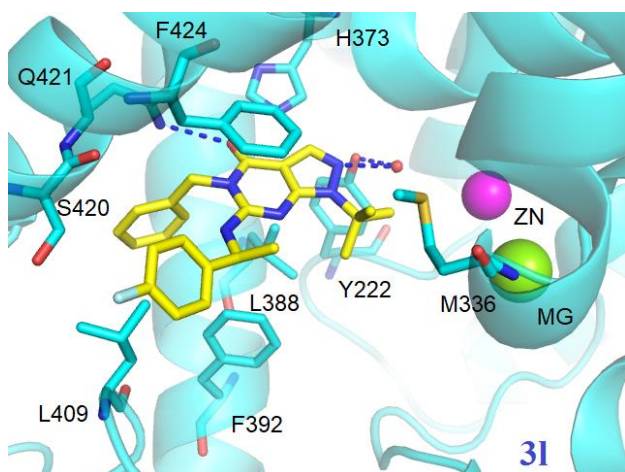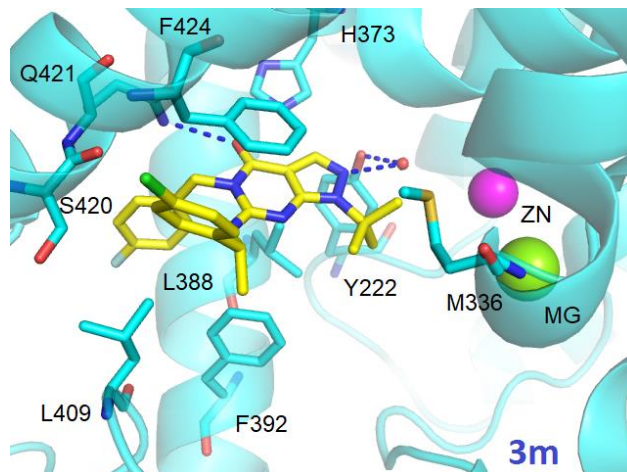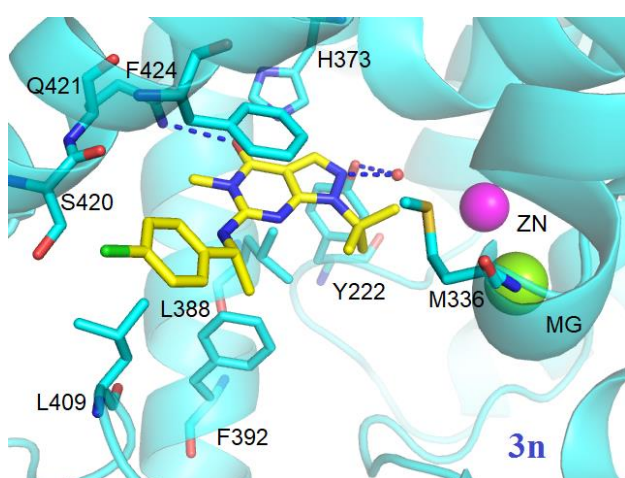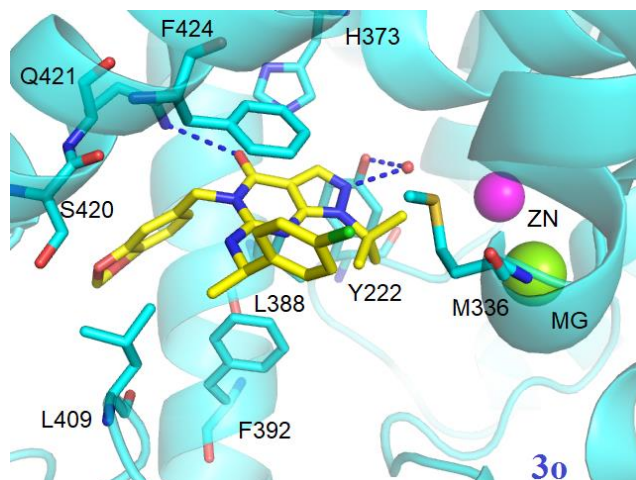

### 3. Stability of **3m** in the rat liver microsomes.

The assays were performed at the Shanghai institute of Materia Medica, Chinese Academy of Sciences, Shanghai, China. **3m** was dissolved in 100% DMSO to prepare a 0.5mM stock solution and diluted to a final concentration of 1.5 $\mu$ M for the experiments. Ketanserin (NPGAH-CO from TCI company) was used as the positive control.

### 4. In vivo pharmacokinetics analysis of **3m**.

The pharmacokinetic properties of **3m** were analyzed by Shanghai institute of Materia Medica, Chinese Academy of Sciences, Shanghai, China. Six male SD rats with a body weight of 230-260 g were purchased from Shanghai SIPPR-BK LAB Animal Ltd., Shanghai, China, and used for the pharmacokinetic analysis of **3m**. It was dissolved/suspended in 5% DMSO, 10% Solutol, and 85% water for intravenous administration (iv) and oral administration (po). A final dosage of 2.5 and 5.0 mg/kg rat of the formulated compounds was administered for iv and po purposes, respectively, and the blood samples were taken at various time points during a 24 h period. The concentration of the compounds in the blood was analyzed by LC-MS/MS (Shimadzu liquid chromatographic system and API4000 mass spectrometer, Applied Biosystems, Ontario, Canada).

### 5. hERG inhibition and humanCYP450 inhibition of **3m**.

The assays were performed by the Medicilon Company, Shanghai, China. hERG inhibition was performed using an automated patch clamp electrophysiology measurement in CHO-hERG cells. The CYP450 inhibition assay was performed by incubating compound **3m** with human liver microsomes and NADPH in the presence of the CYP450-isoform specific probe substrate. The IC<sub>50</sub> values of compound **3m** for five CYP isoenzymes (i.e., CYP1A2, CYP2C9, CYP2D6, CYP3A4-M

and CYP3A4-T) were determined.

## 6. Acute toxicity of compound **3m**.

The acute toxicity was tested according to similar protocols that were described in our previous study.<sup>1</sup> Thirty KM mice (22 days, 18-20 g), which were purchased from the Laboratory Animal Center of Sun Yat-Sen University (Guangzhou, China), were used to evaluate the acute toxicity of **3m**. Mice were randomly divided into three groups, and each group was given in single oral dose of 0, 1000, or 1500 mg/kg **3m** on the first day of the experiment. Mice were maintained on a 12 h light/dark cycle (light from 7:00 to 19:00) at room temperature and 60-70% relative humidity. Sterile food and water were provided according the institutional guidelines. Prior to each experiment, mice were fasted overnight and allowed free access to water. Compound **3m** was dissolved in 5% DMSO/10% Solutol/85% water solution and orally administered. Mice were observed for any abnormal behavior and mortality and weighed 4 h after **3m** was administered and then every 24h for 14 days. Animals were sacrificed on the 14th day, and tissue samples of the heart, liver, and kidney were macroscopically examined for possible damage.

## 7. Molecular Docking and Molecular Dynamics Simulations.

The X-ray crystal structure of PDE1 (PDB code: 5UP0) and **C33**-PDE9A complex (PDB ID: 4Y874) was selected for molecular modeling, and Surflex-dock embedded in the software Tripos Sybyl 2.0 was used.<sup>2,3</sup> Two metal ions crucial for the PDE's catalytic activity in the catalytic domain and water molecules coordinate these two metal ions were retained. Hydrogen atoms were added, and the ionizable residues were protonated at the neutral pH. The protomol, was generated using the

parameters by default. The parameters of `proto_thresh` and `proto_bloat` were assigned 0.5 and 0, respectively. After the protomol was the prepared, molecular docking was performed for test molecules.

After molecular docking completed, similar MD simulation procedures as previous studies were used to equilibrate the whole system. Here 8 ns MD simulations were carried out in the NPT ensemble with a constant pressure of 1 atm and a constant temperature of 300 K. The periodic boundary conditions were adopted, along with an 8 Å cutoff for long-range electrostatic interactions with the partial mesh Ewald (PME) method. The SHAKE algorithm was utilized to deal with all bonds involving hydrogen atoms, and hence the time step was set to 2 fs. An Intel Xeon E5620 CPU and an NVIDIA Tesla C2050 GPU, which are available in performing floating-point calculations, were applied to accelerate the process of MD simulations for each system. Subsequently, the 100 snapshots were isolated from the final 1.0 ns period of the MD simulation trajectories, and then used for binding-free-energy calculations by the MM-PBSA approach. For the electrostatic contribution to the solvation-free energy, the PBSA program in the Amber 16 suite was used, which could numerically solves the Poissone Boltzmann equations.

In light of the MM-PBSA method, the binding free energy ( $\Delta G_{\text{bind}}$ ) can be calculated by the following equation 1.  $G_{\text{complex}}$ ,  $G_{\text{rec}}$  and  $G_{\text{lig}}$  represent the free energies of complex, receptor and ligand, respectively.

$$\Delta G_{\text{bind}} = G_{\text{complex}} - G_{\text{rec}} - G_{\text{lig}} \quad (1)$$

Each free energy was evaluated by the sum of the MM energy  $E_{\text{MM}}$ , the solvation free energy  $G_{\text{solv}}$ , and the entropy contribution  $S$ , respectively, leading to equation 2.

$$\Delta G_{\text{bind}} = \Delta E_{\text{MM}} + \Delta G_{\text{solv}} - T\Delta S \quad (2)$$

$\Delta E_{\text{MM}}$  is the gas phase interaction energy and can be decomposed into  $E_{\text{MM, comp}}$ ,  $E_{\text{MM, rec}}$  and  $E_{\text{MM, lig}}$ . Solvation free energy is evaluated by the sum of the electrostatic solvation free energy and nonpolar

solvation free energy. The electrostatic solvation free energy,  $\Delta G_{PB}$ , was solved by the Poisson Boltzmann (PB) equation, while the nonpolar solvation free energy varies proportionally with the solvation accessible surface area (SASA), leading to by equation 3 and 4.

$$\Delta G_{solv} = \Delta G_{PB} + \Delta G_{np} \quad (3)$$

$$\Delta G_{np} = \gamma \text{ SASA} + b \quad (4)$$

In order to get the compromise between efficiency and accuracy, entropy contribution term was omitted for  $\Delta G_{bind}$  in equation 2, since the calculations of the entropy contribution is extremely time-consuming for large protein-ligand systems. The default parameters were adopted, with  $\gamma = 0.0072$  kcal/(Å<sup>2</sup>) and  $b = 0$  kcal/mol. The charges of Mg<sup>2+</sup> and Zn<sup>2+</sup> were assigned 2.0 for PB calculations, and their bond radii were used for SA calculations.



## 8. $^1\text{H}$ NMR and $^{13}\text{C}$ NMR spectra of the targeted compounds.

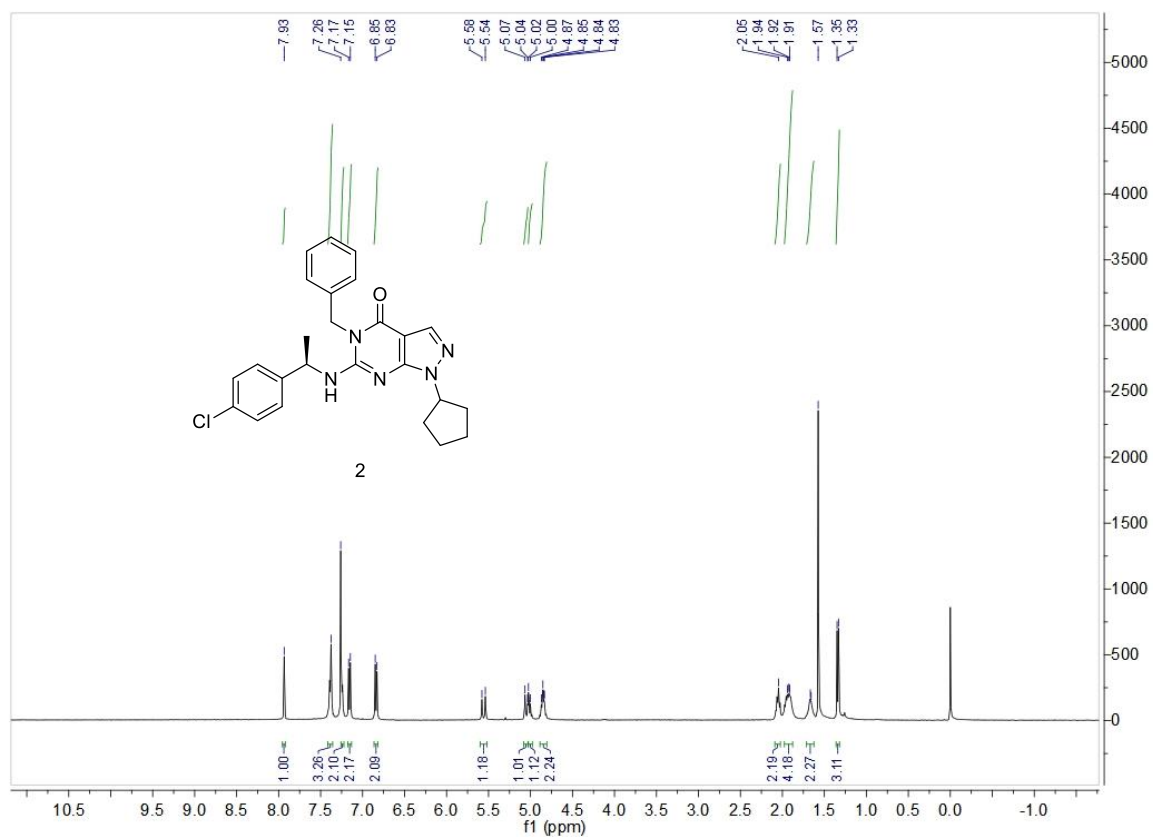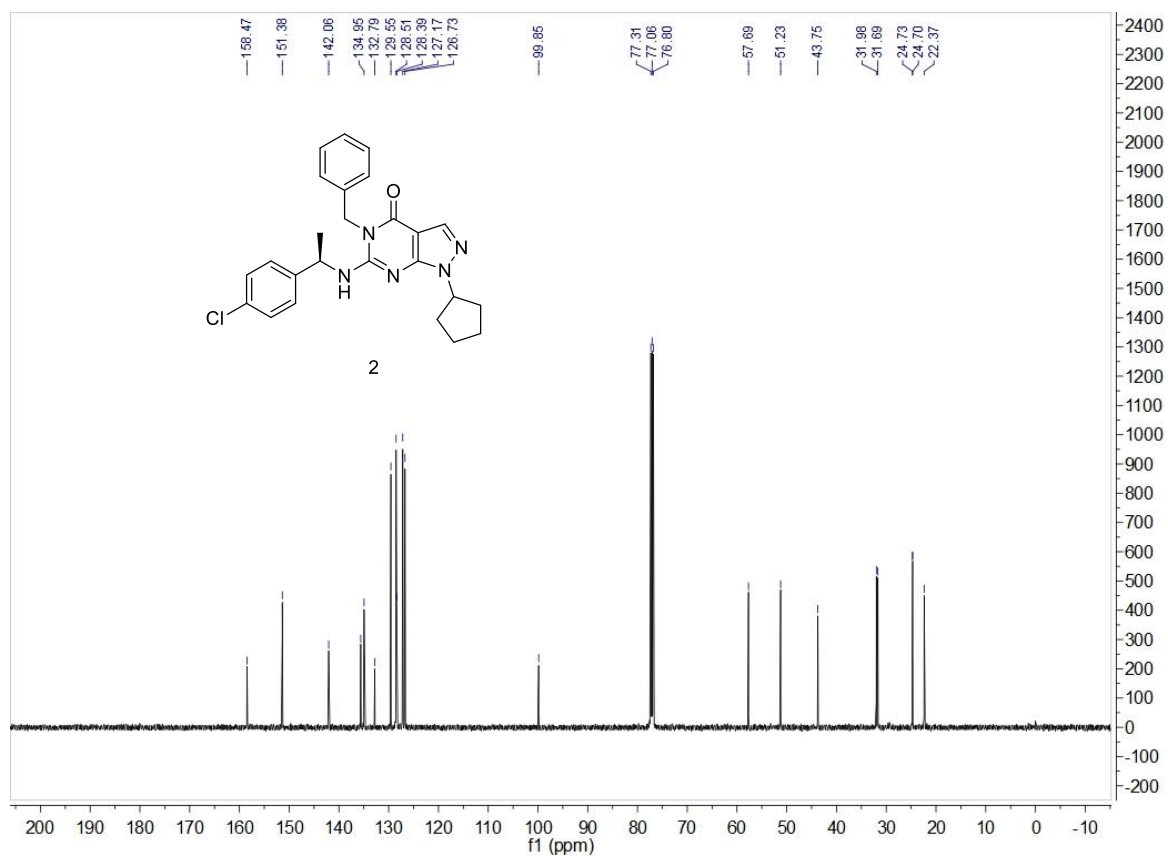

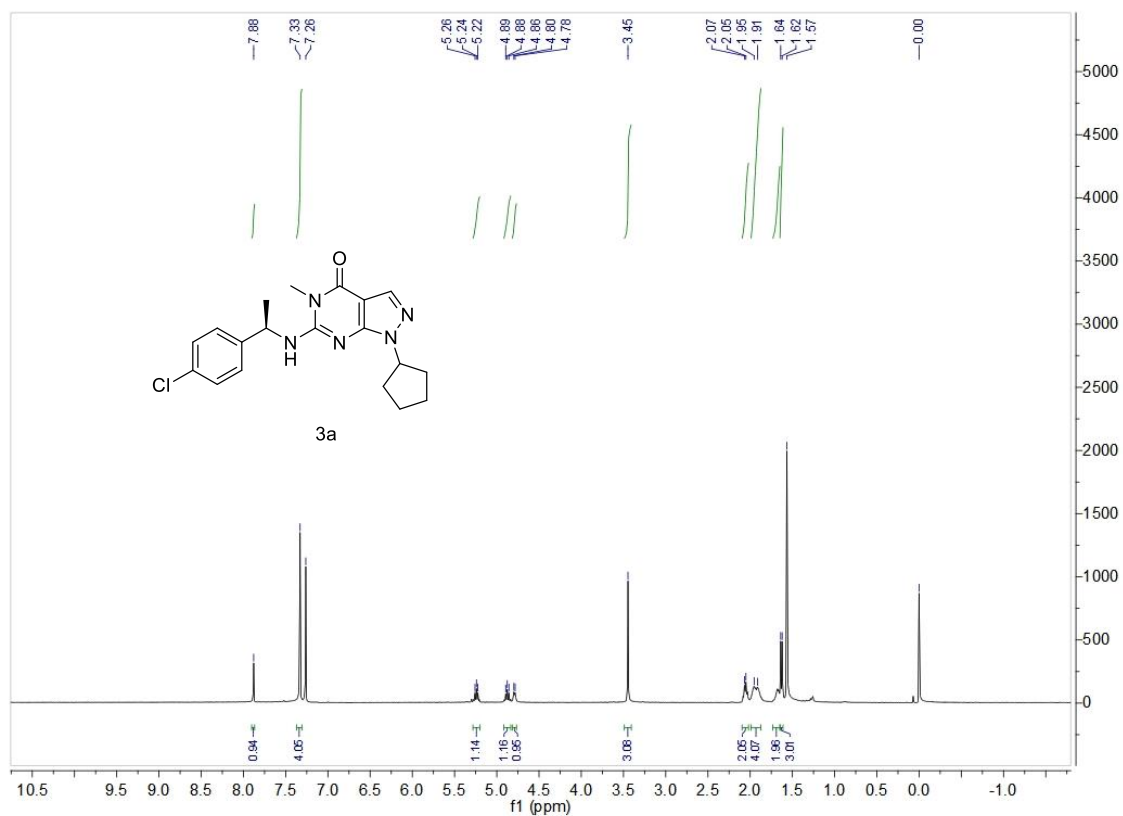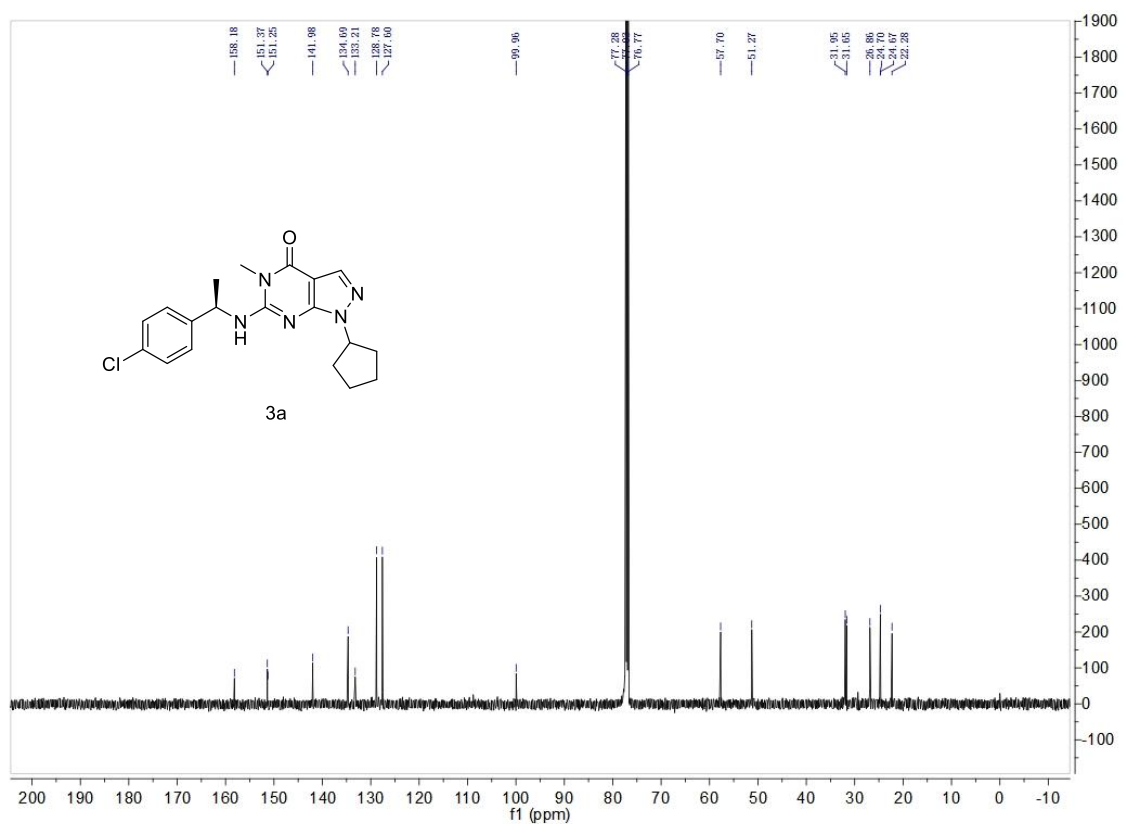

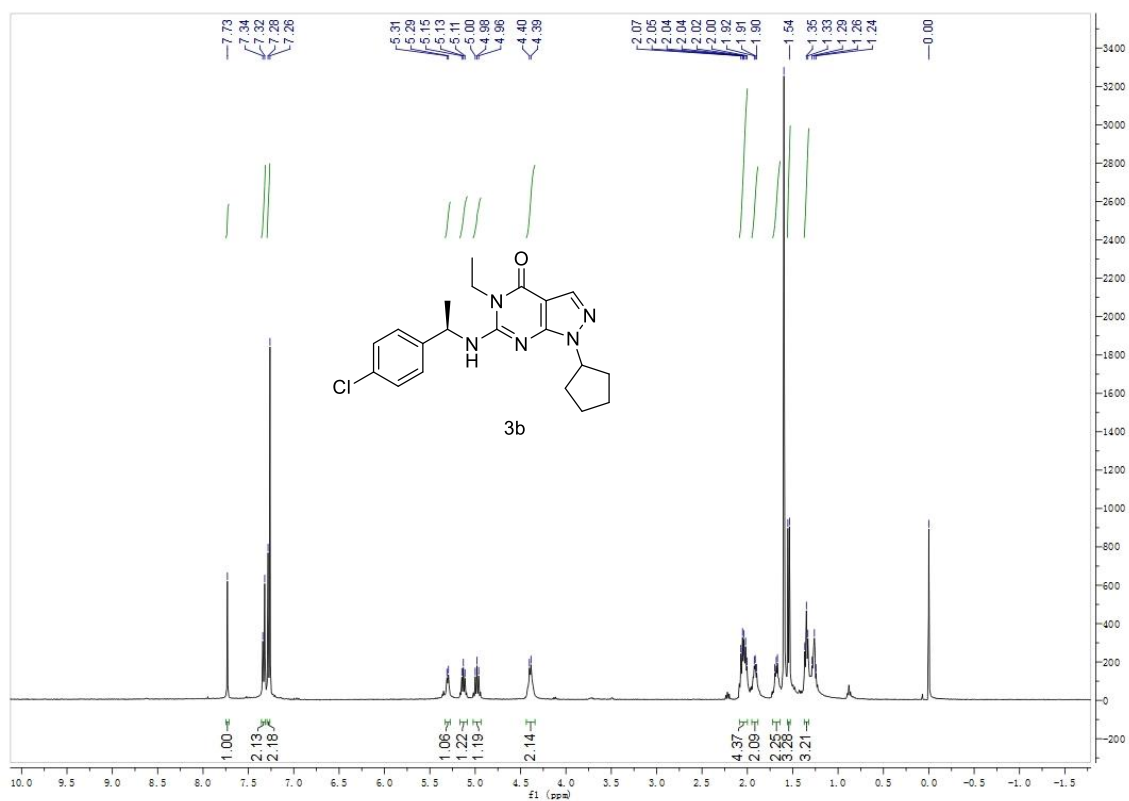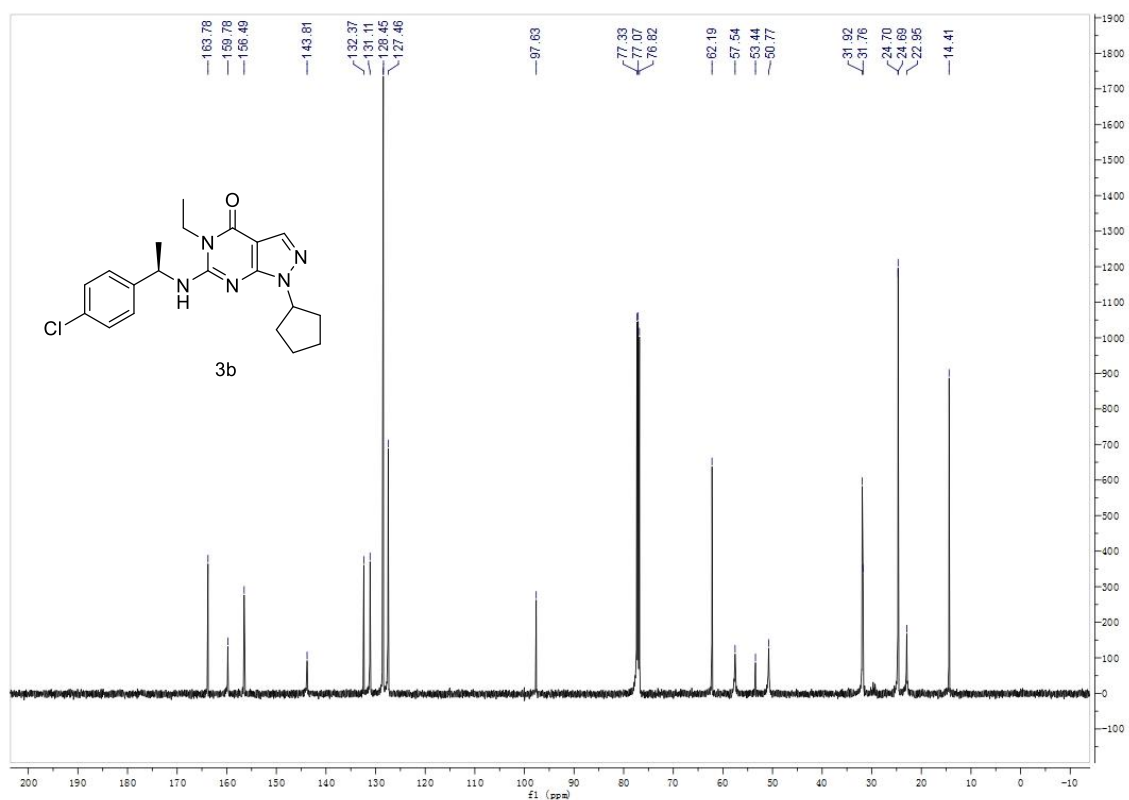

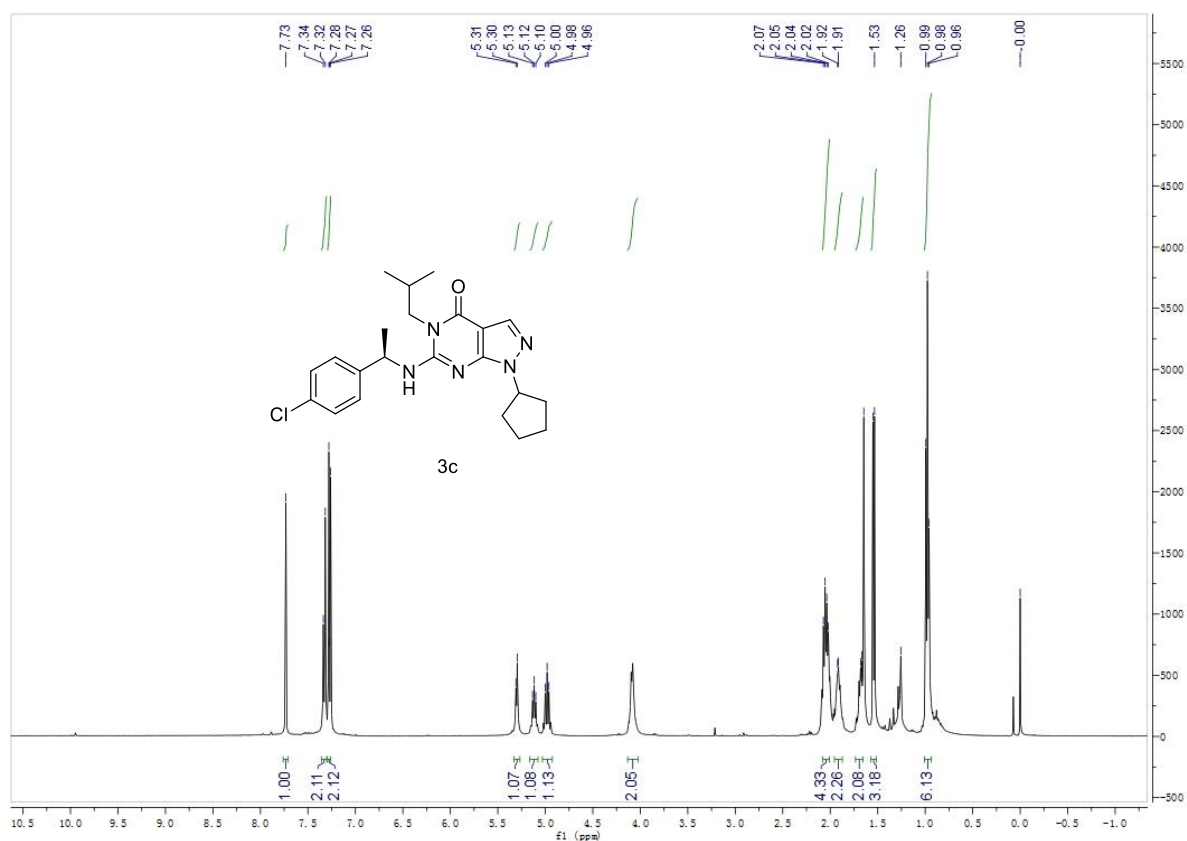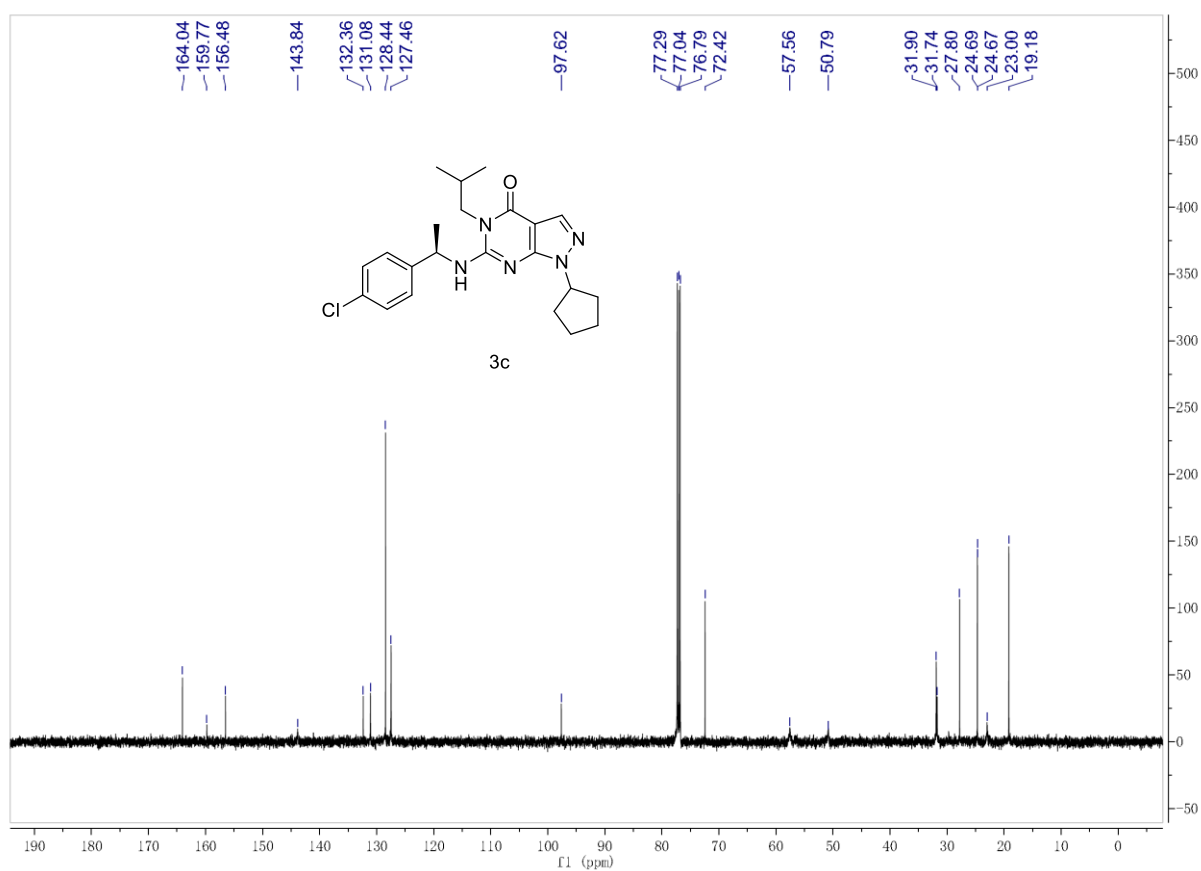

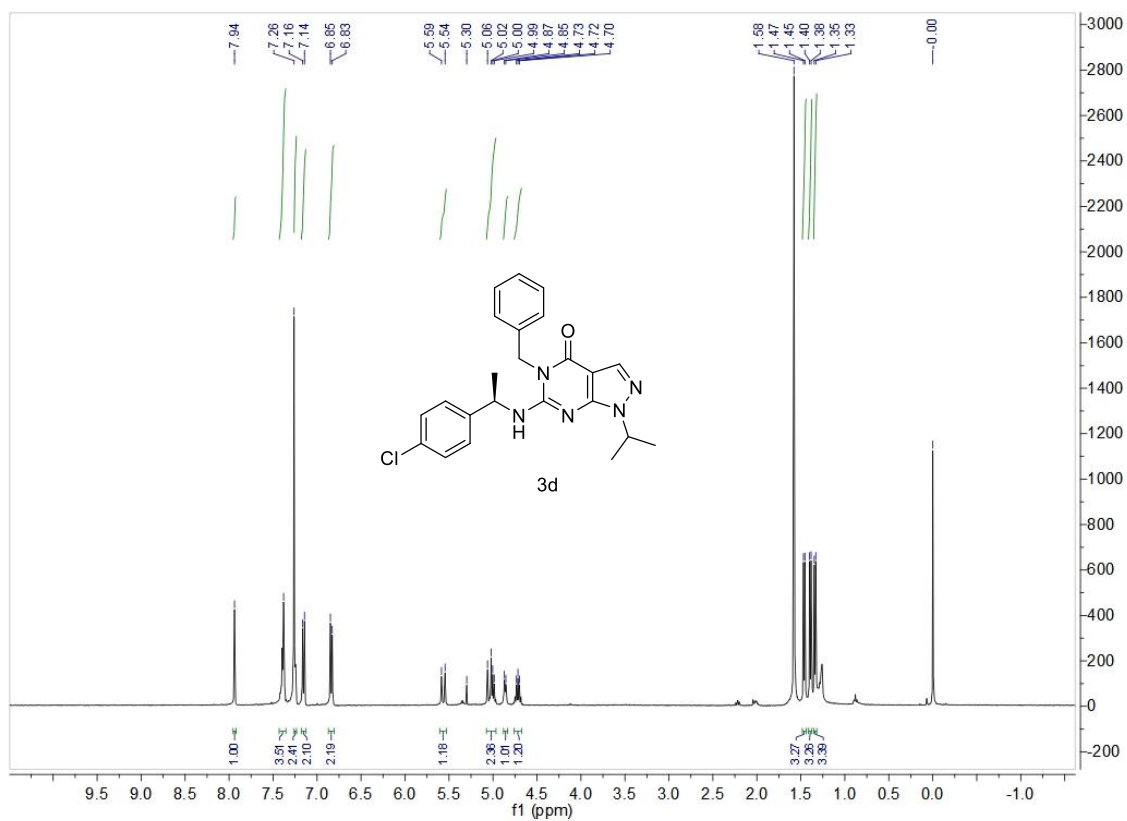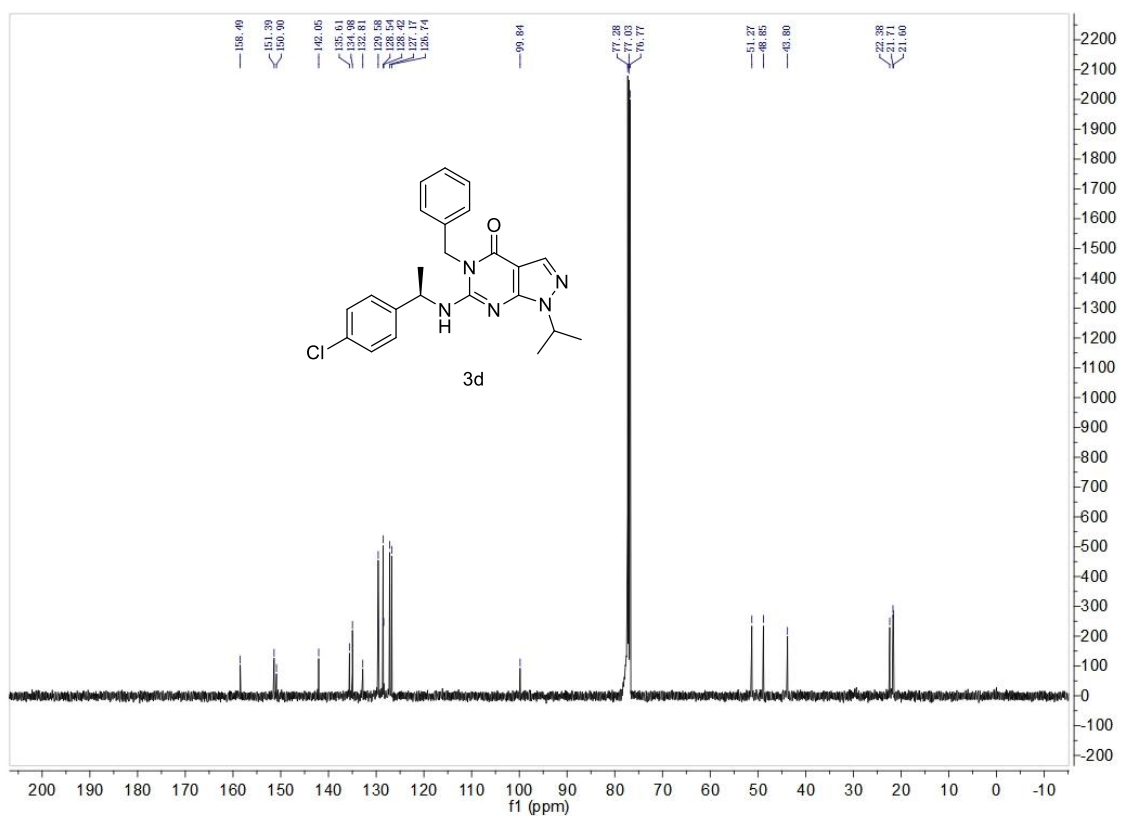

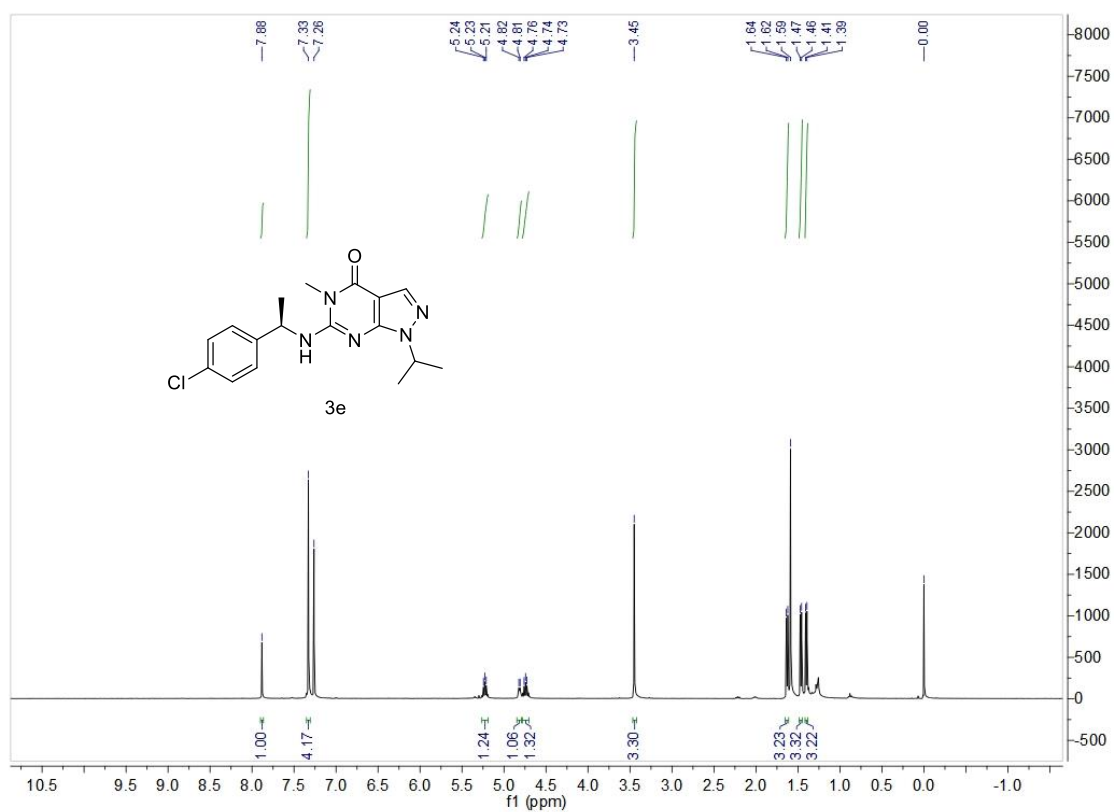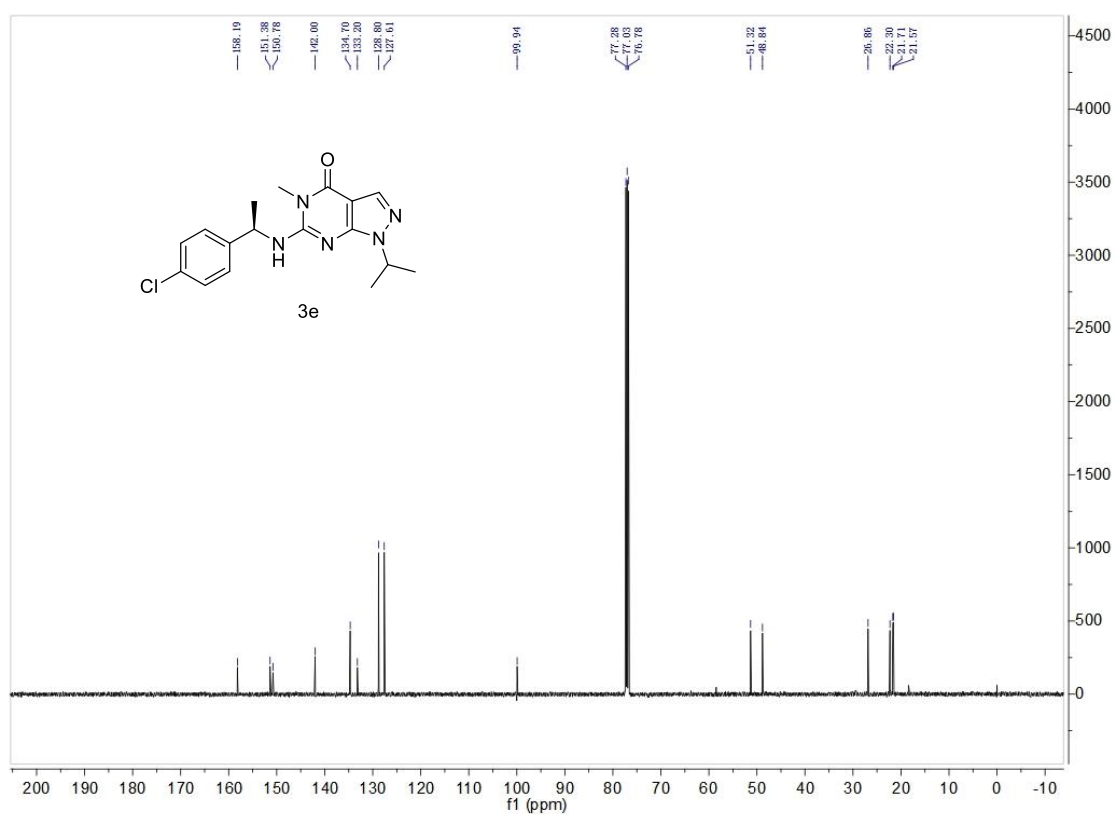



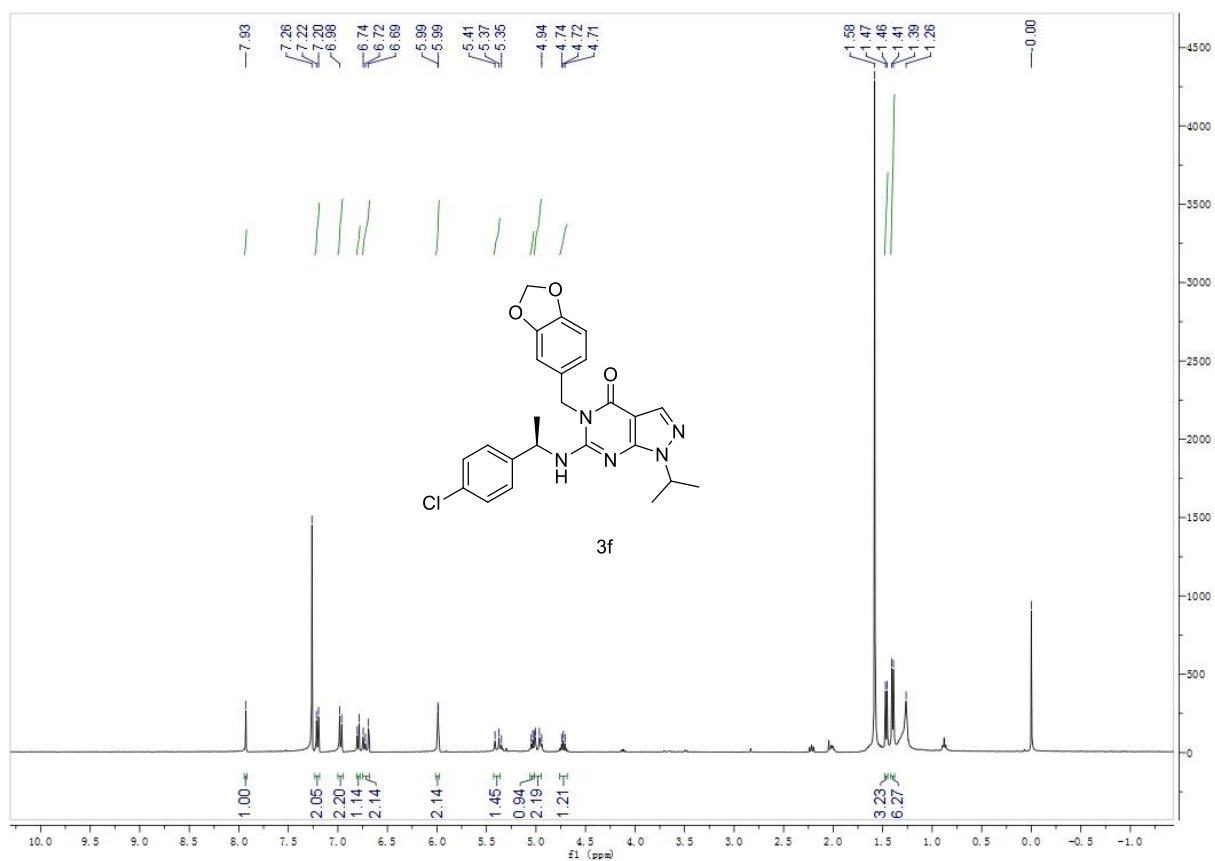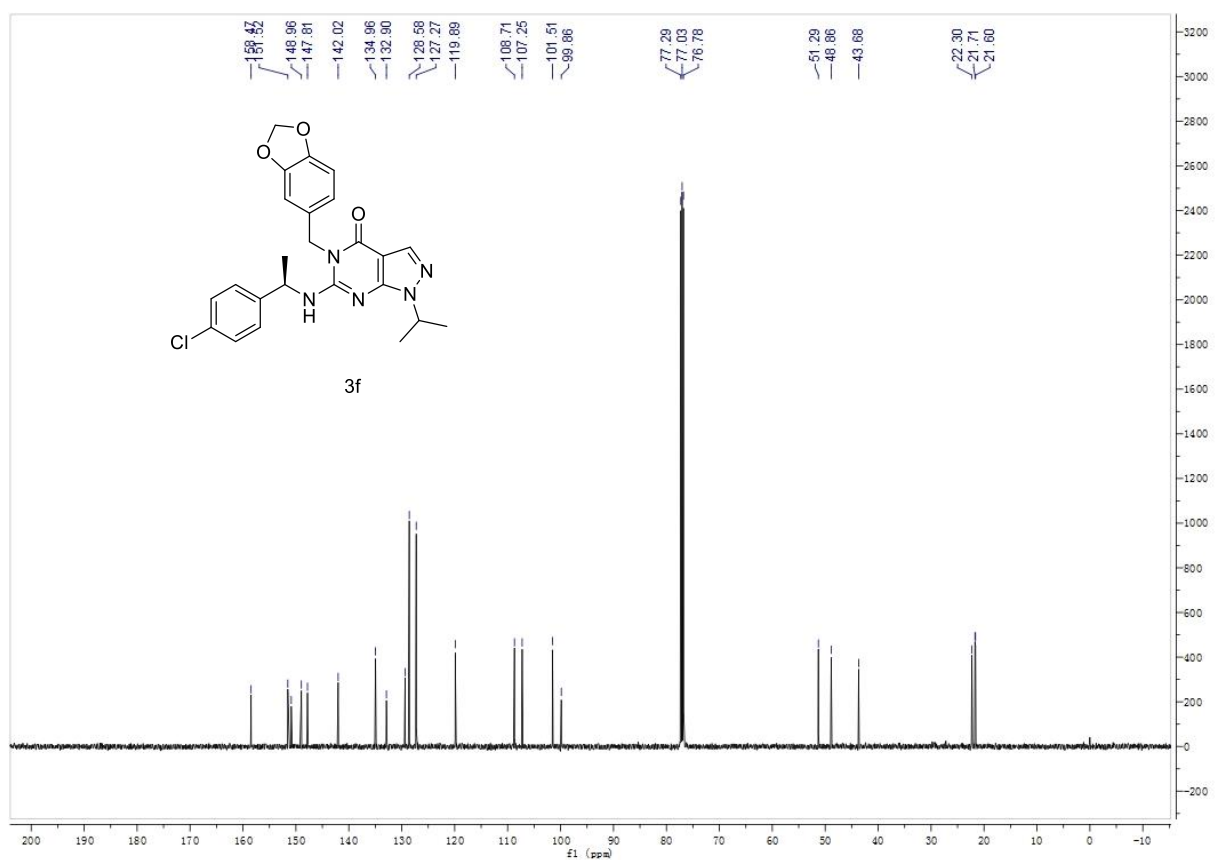

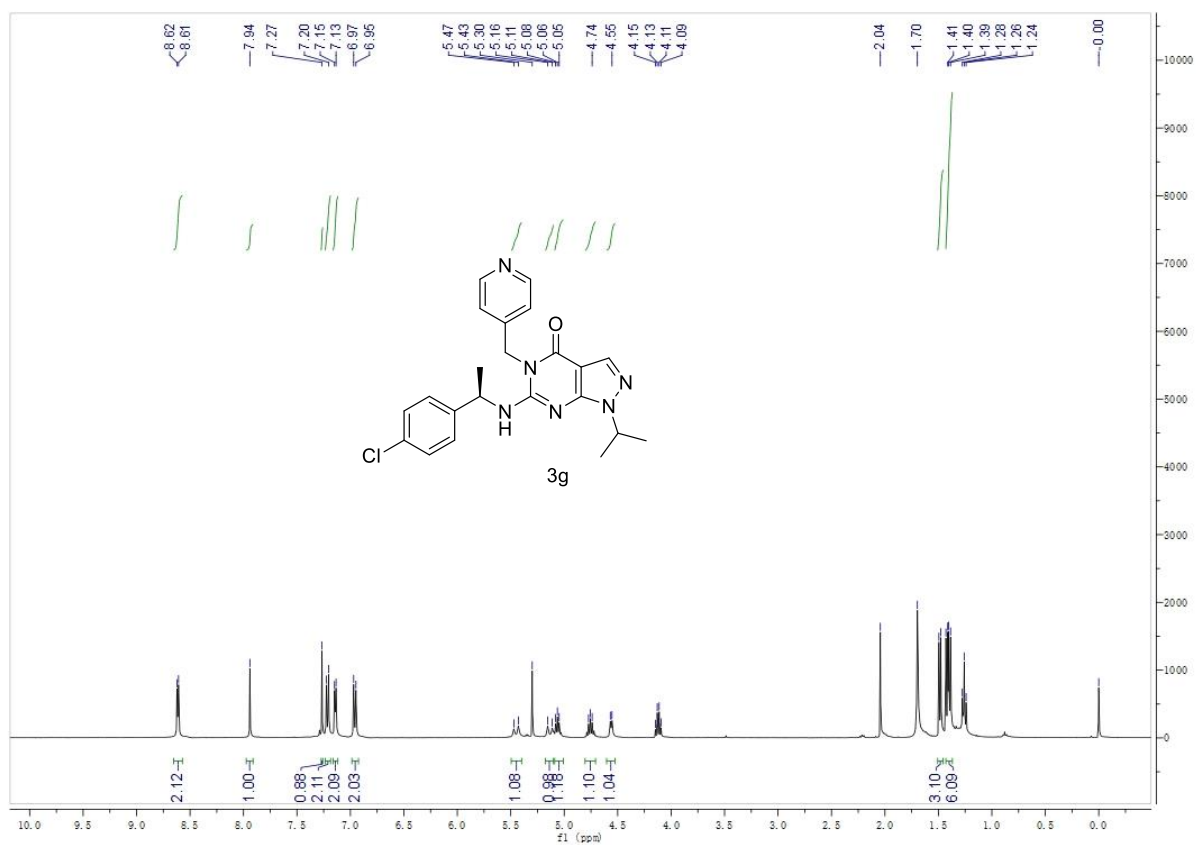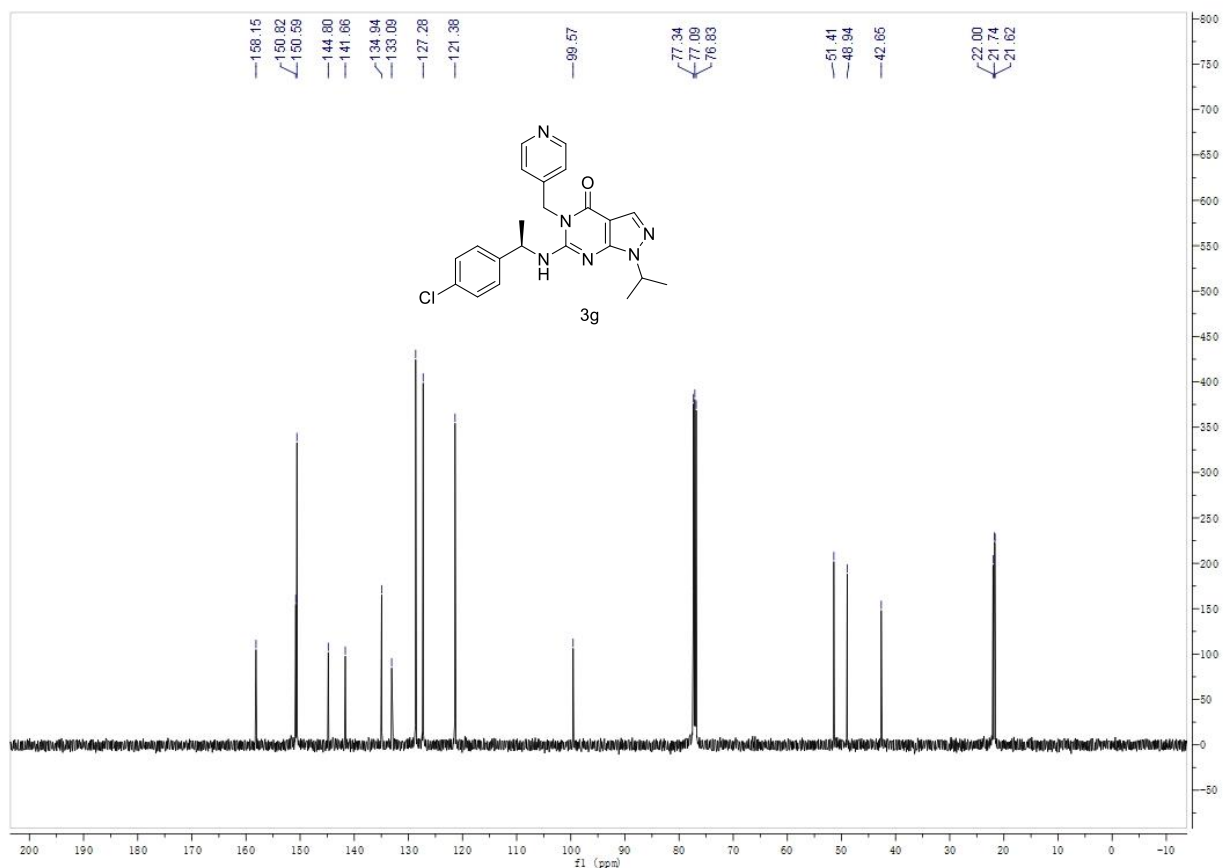

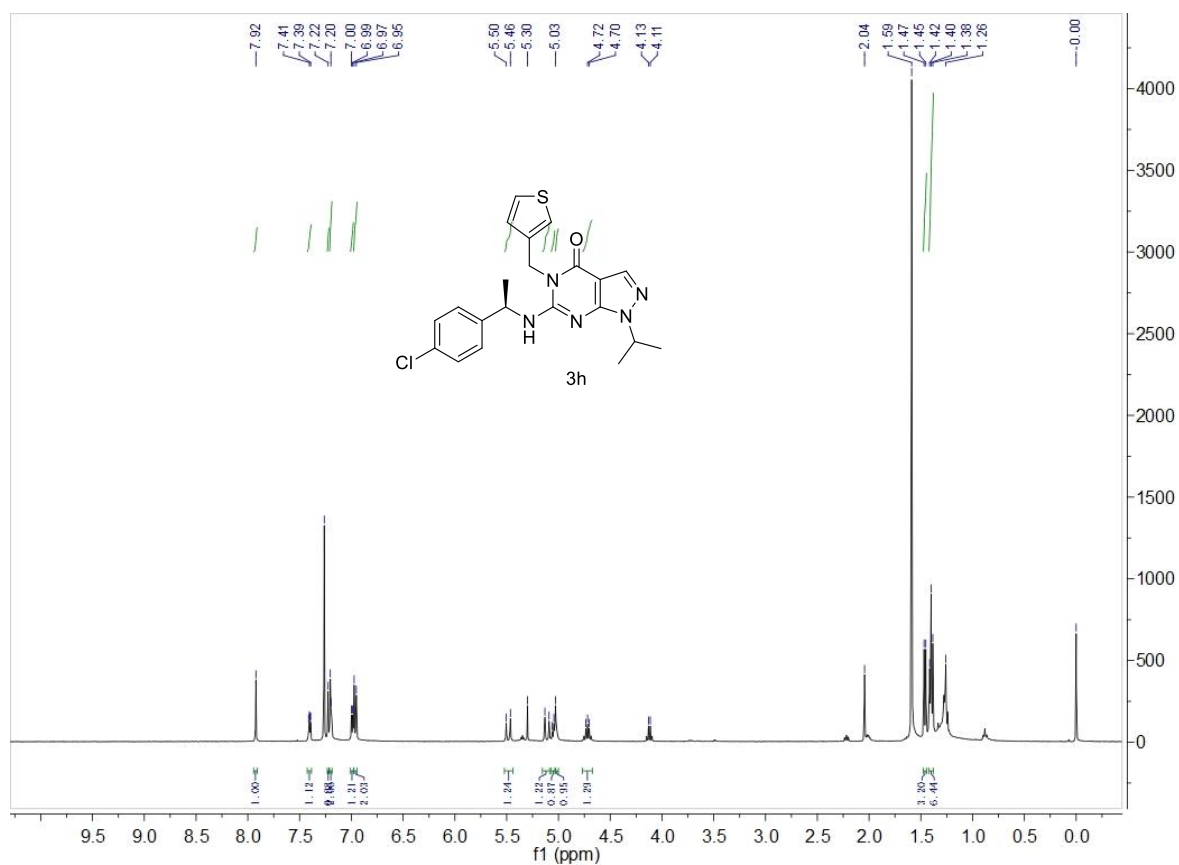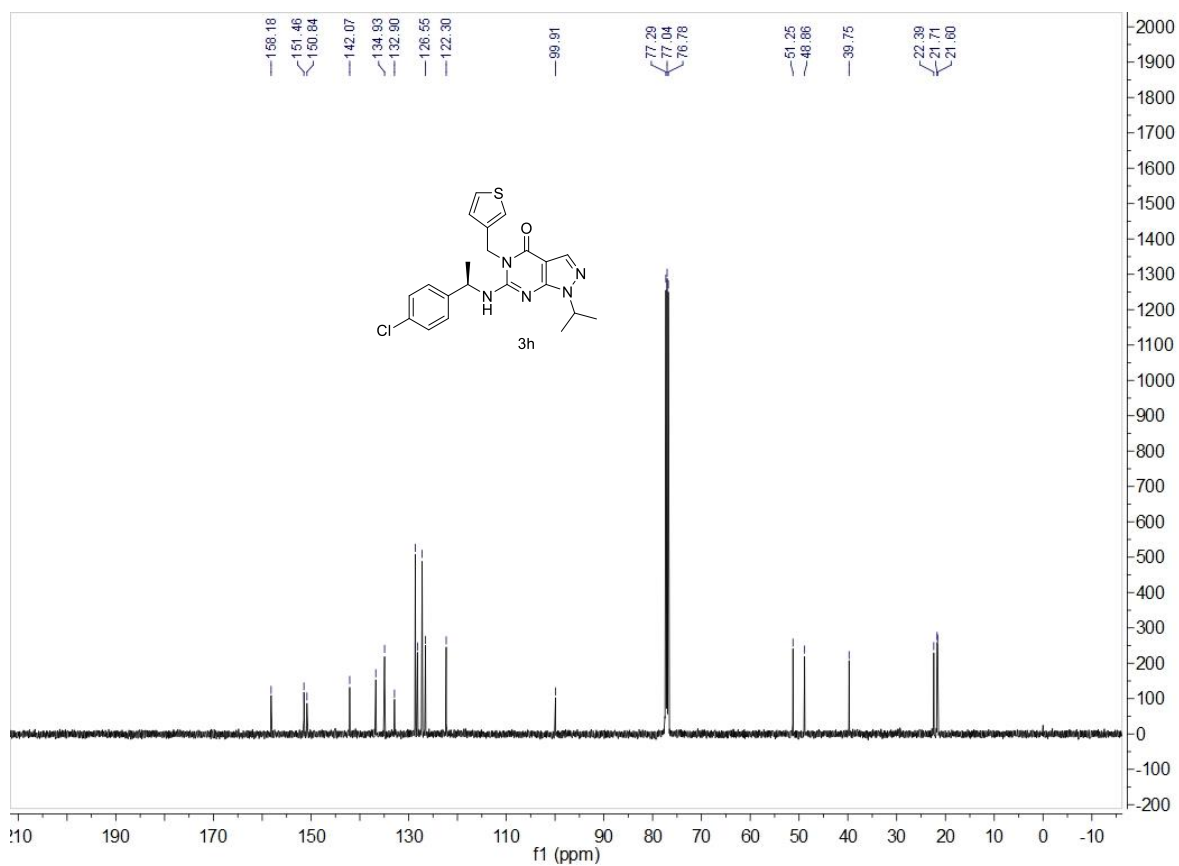

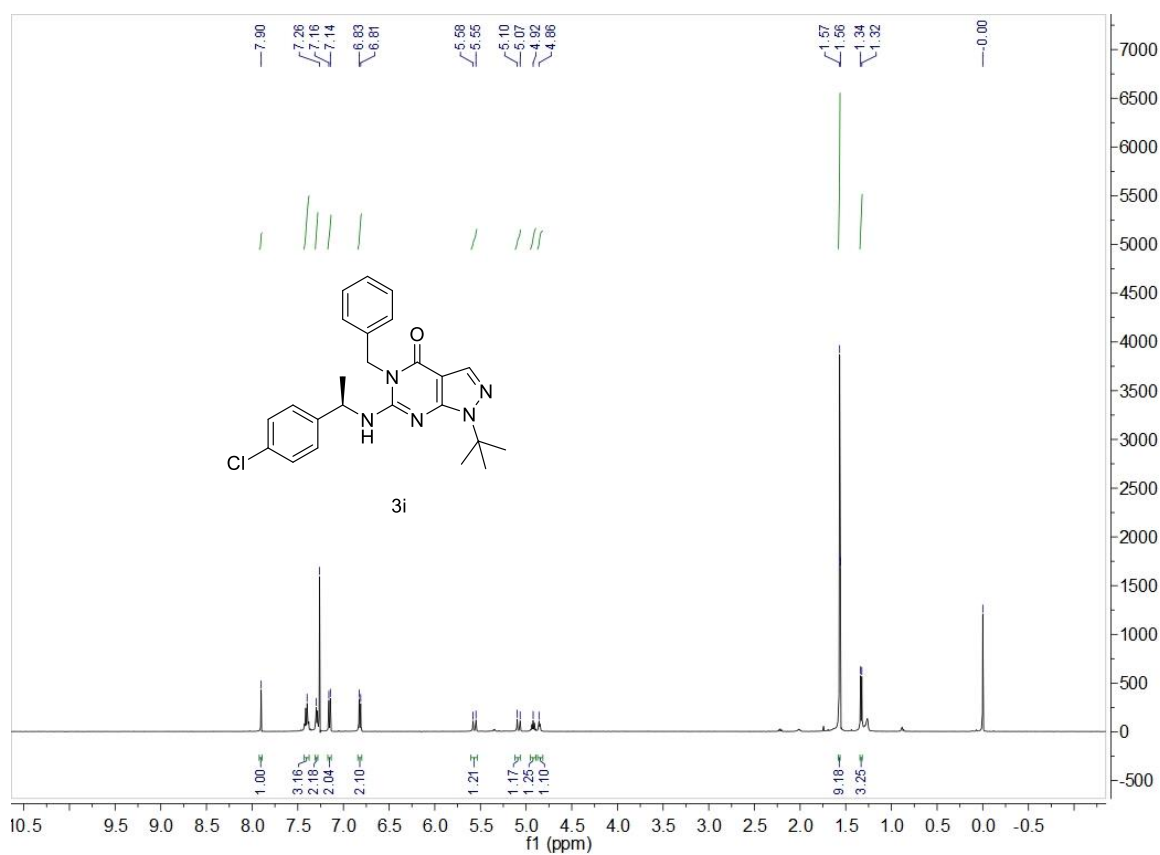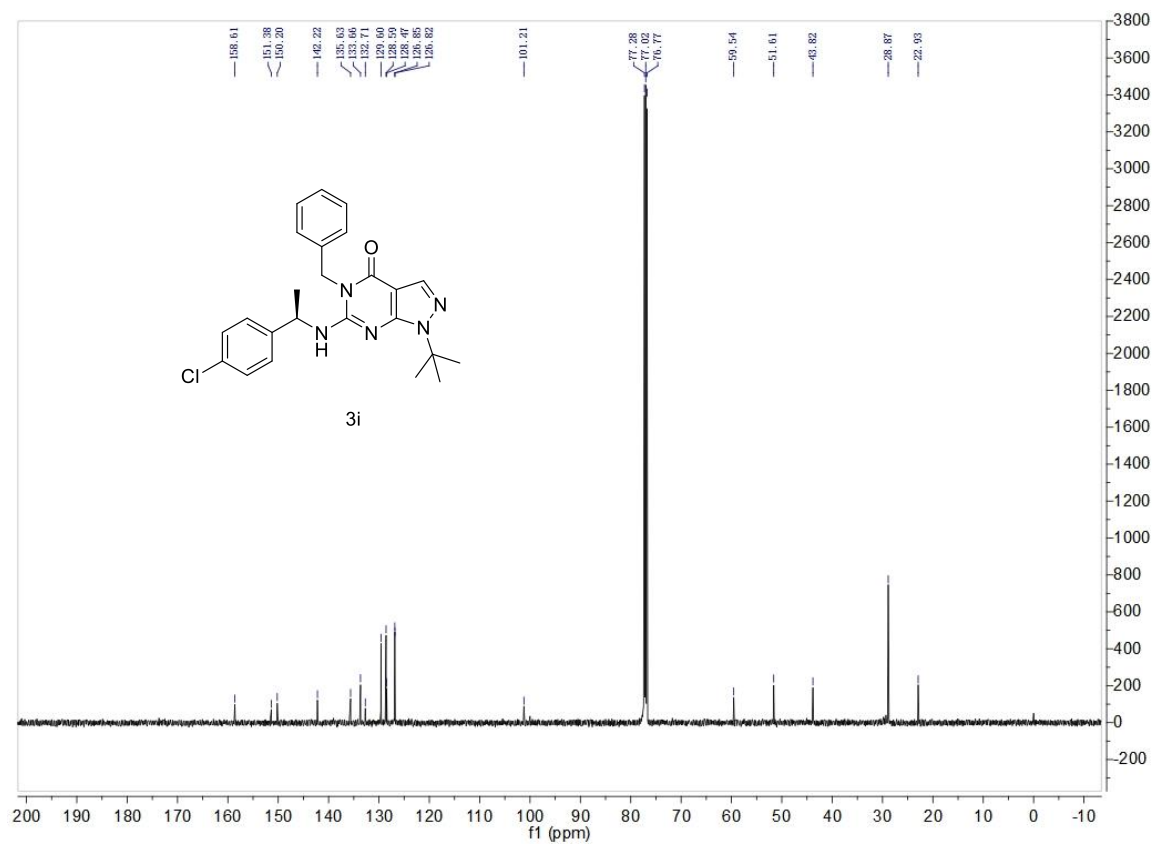

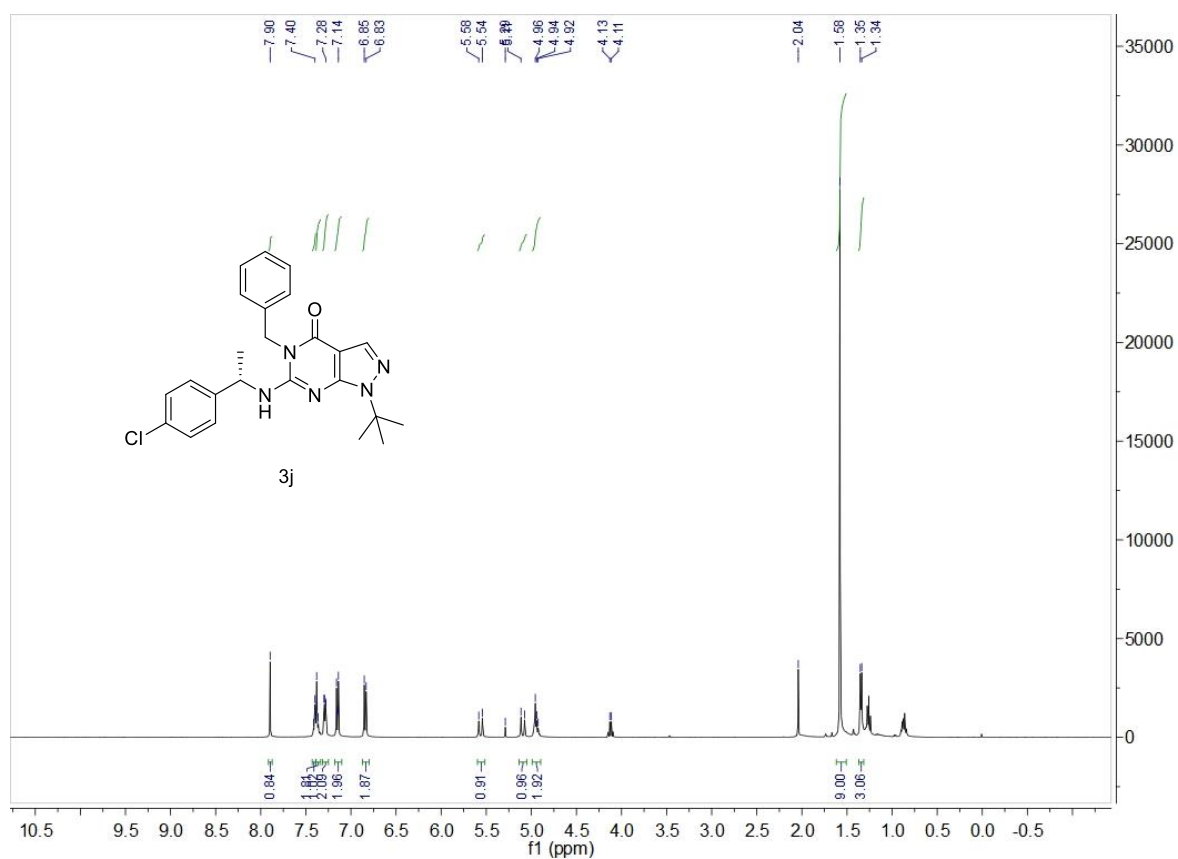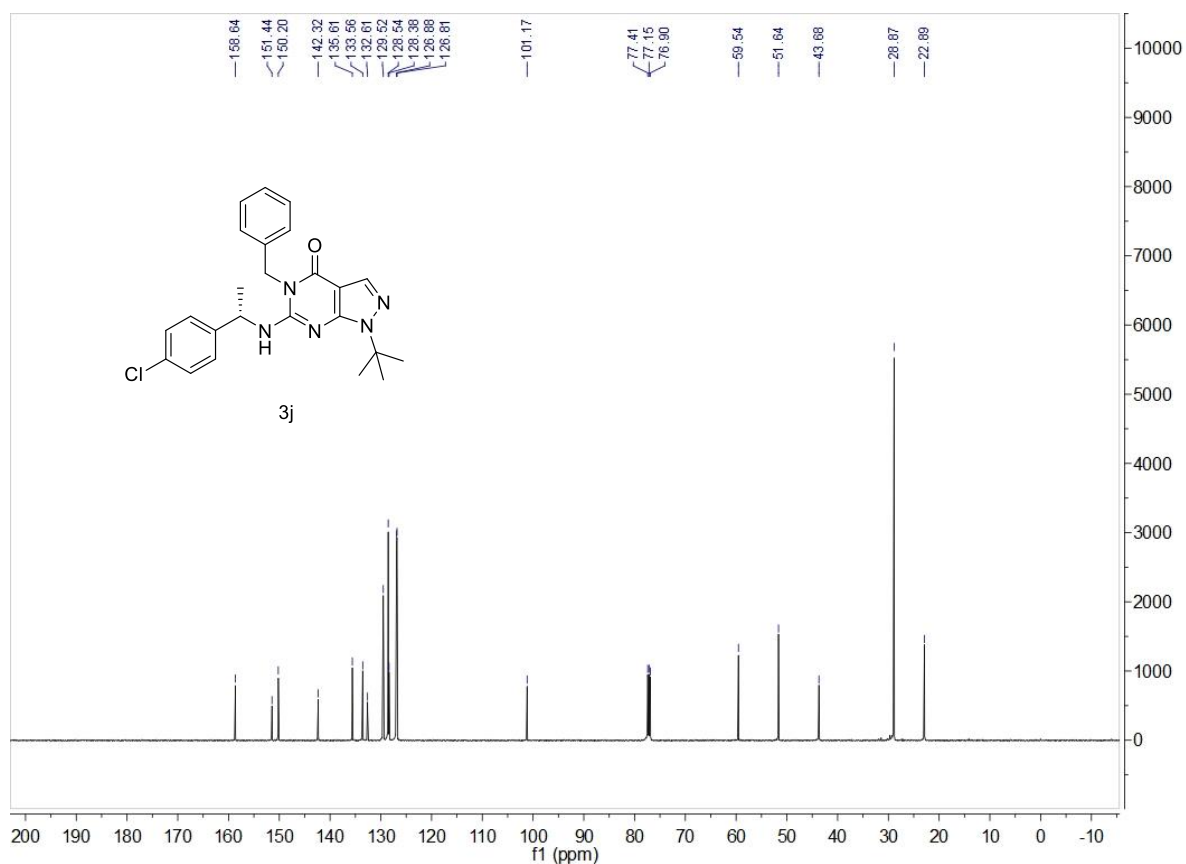

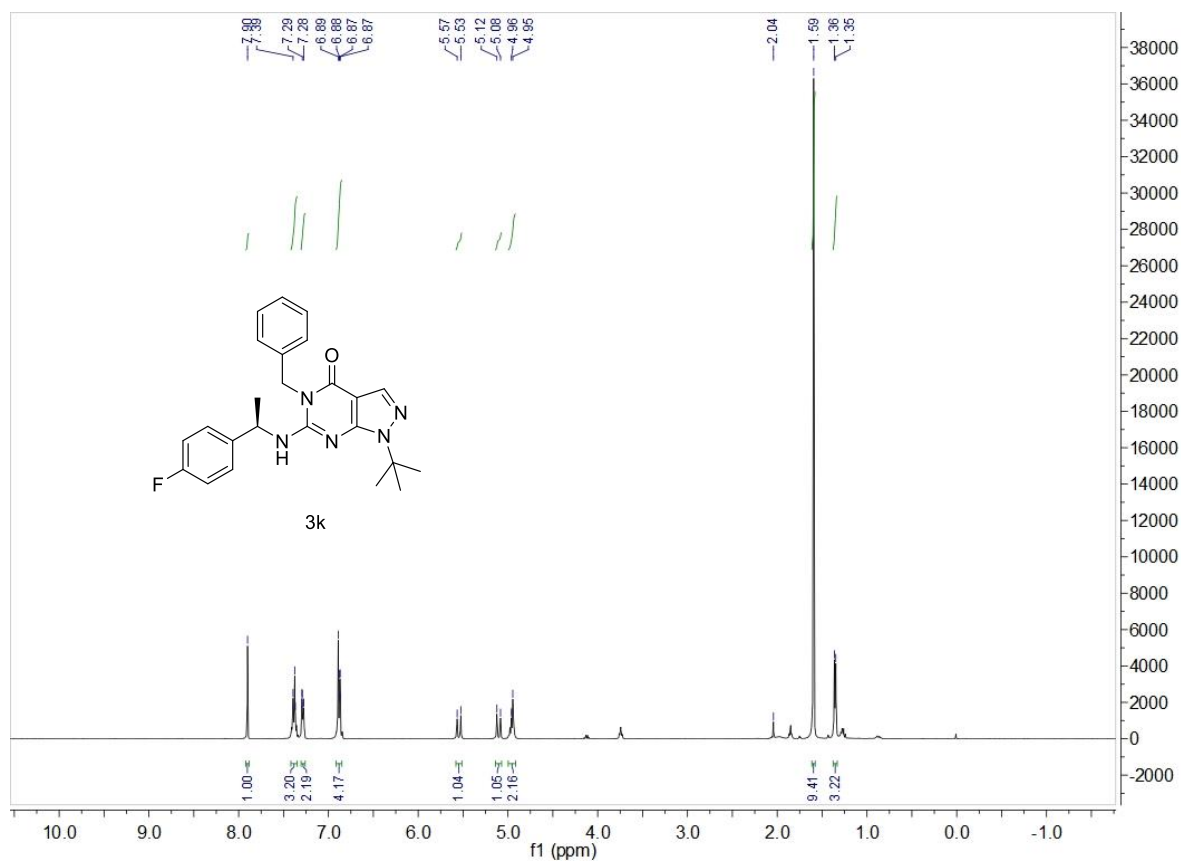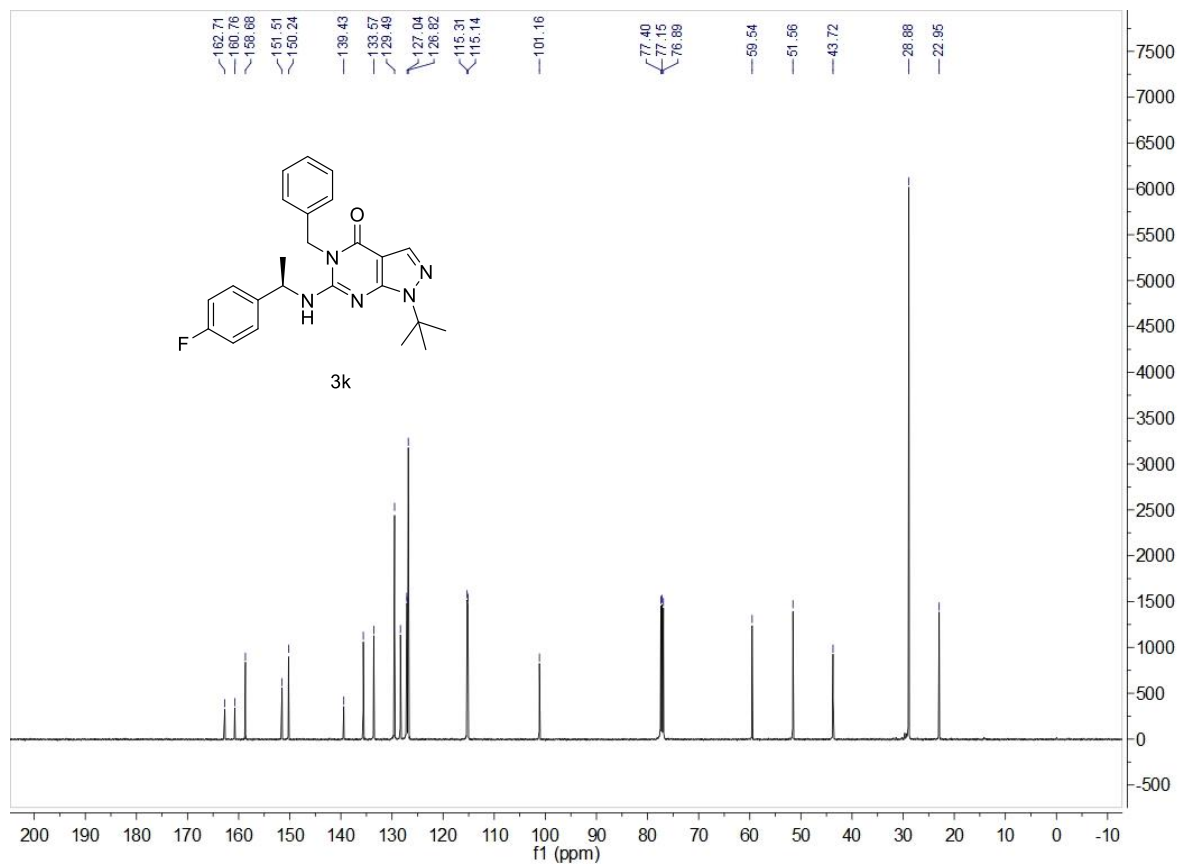



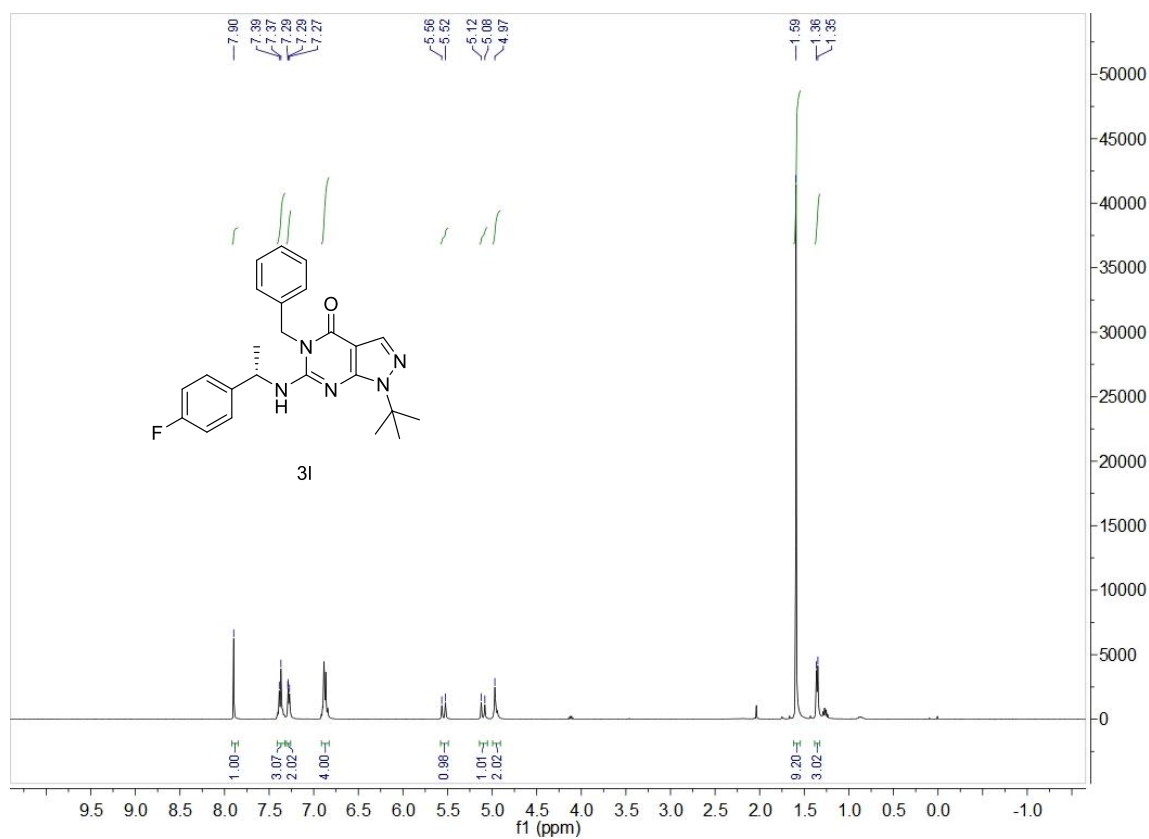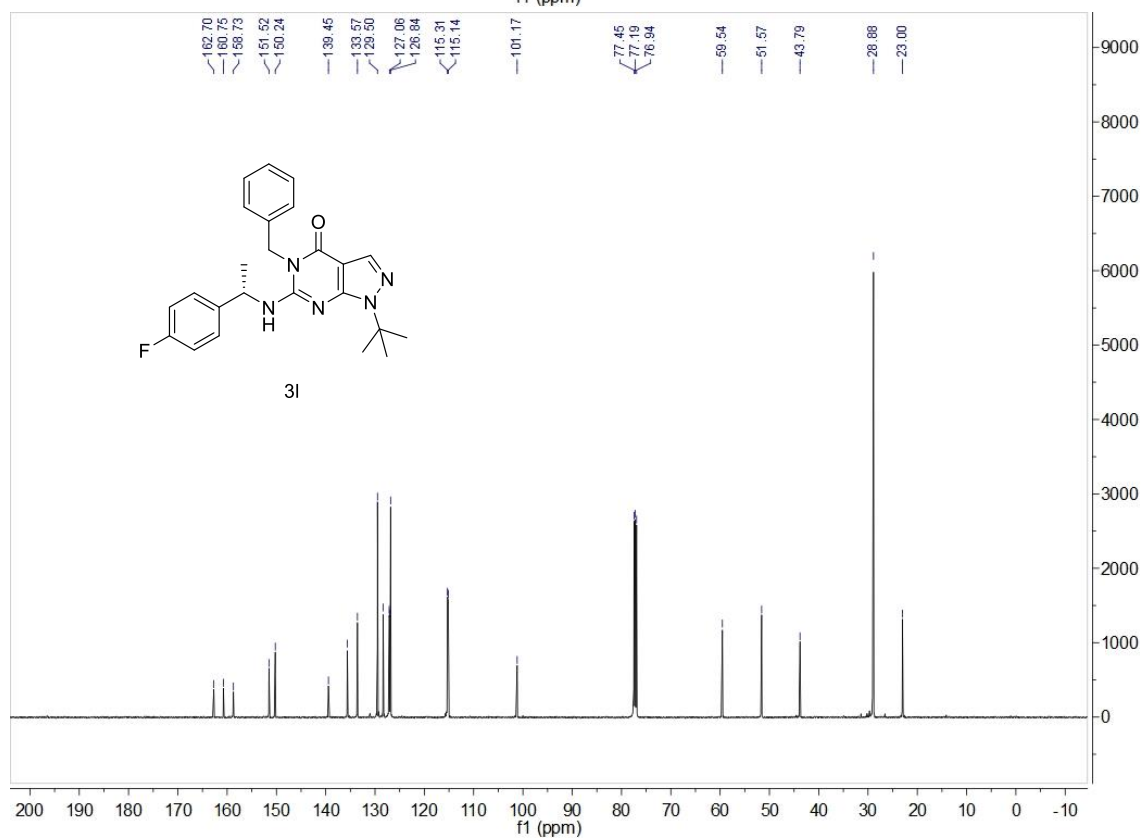

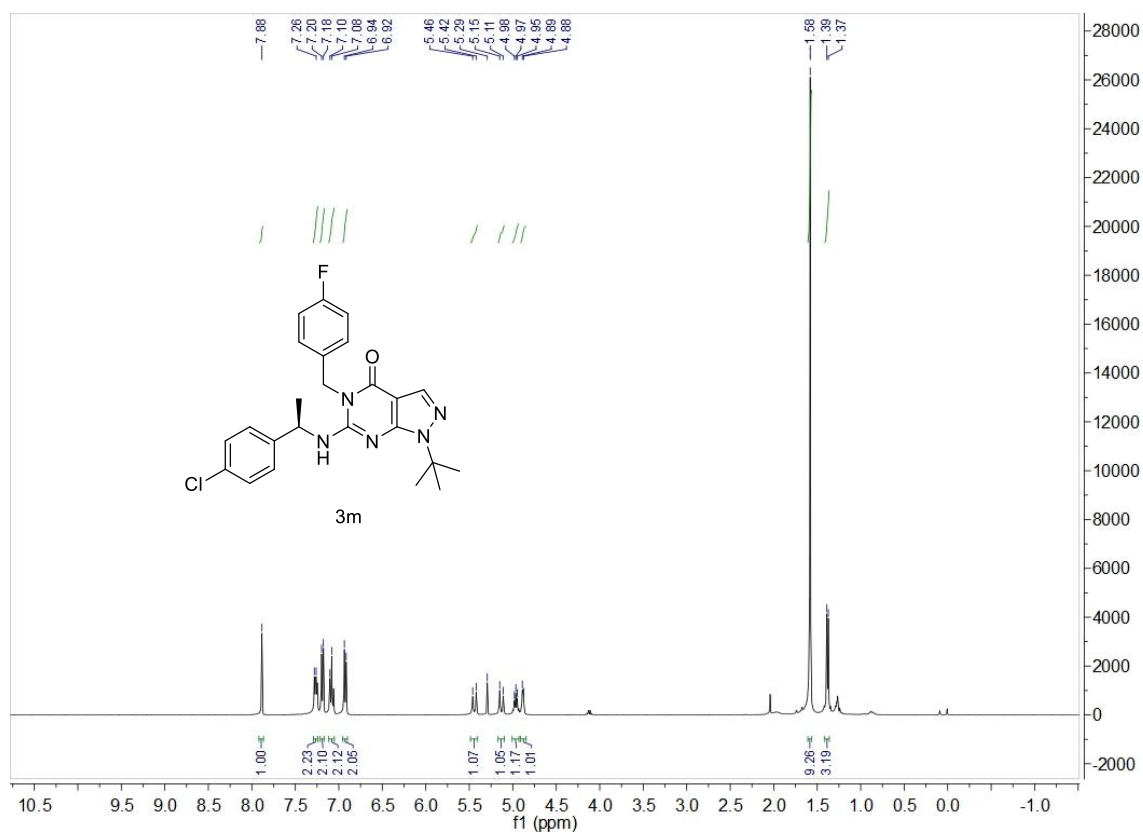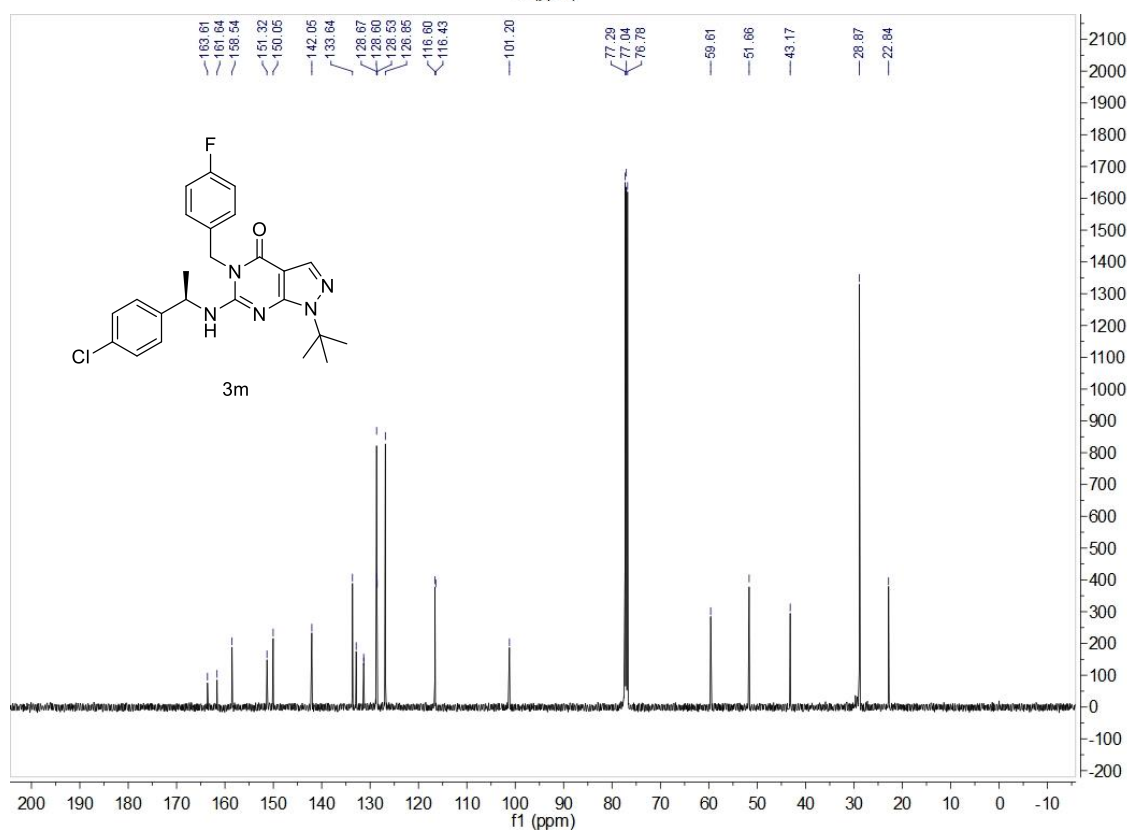

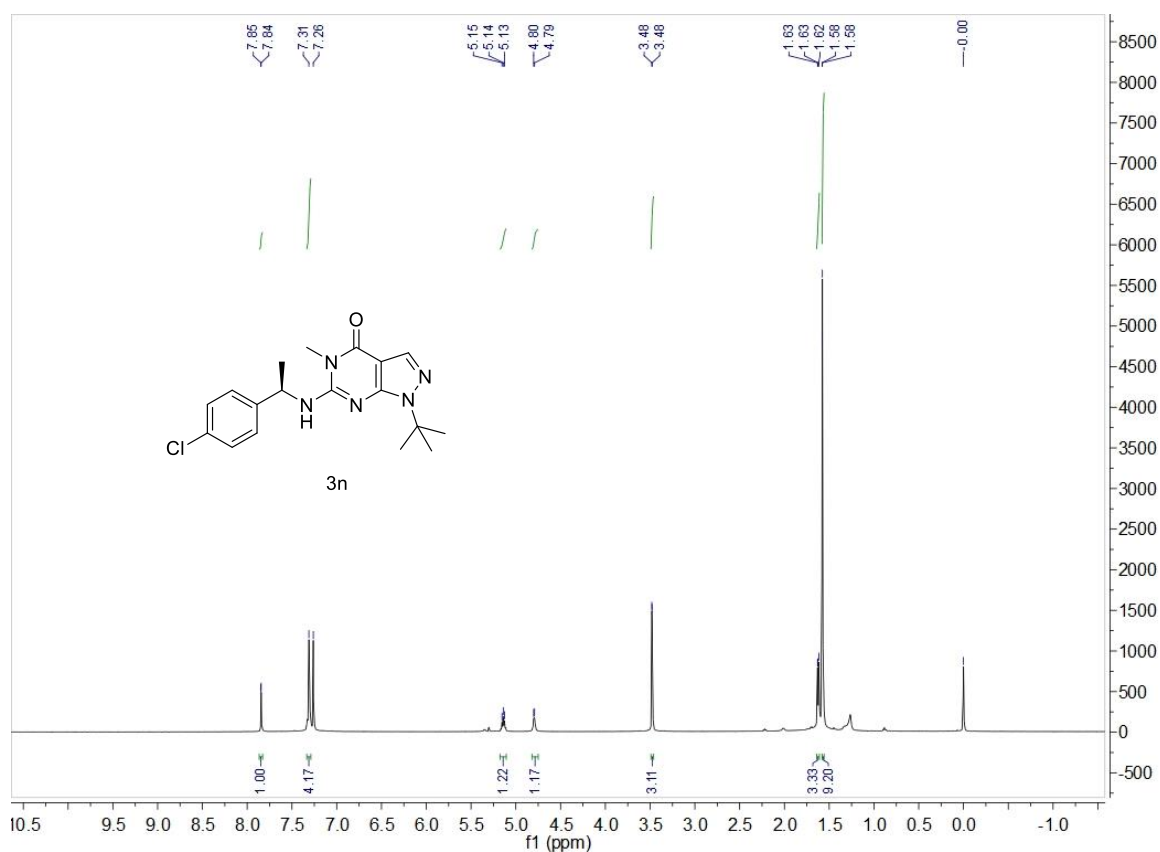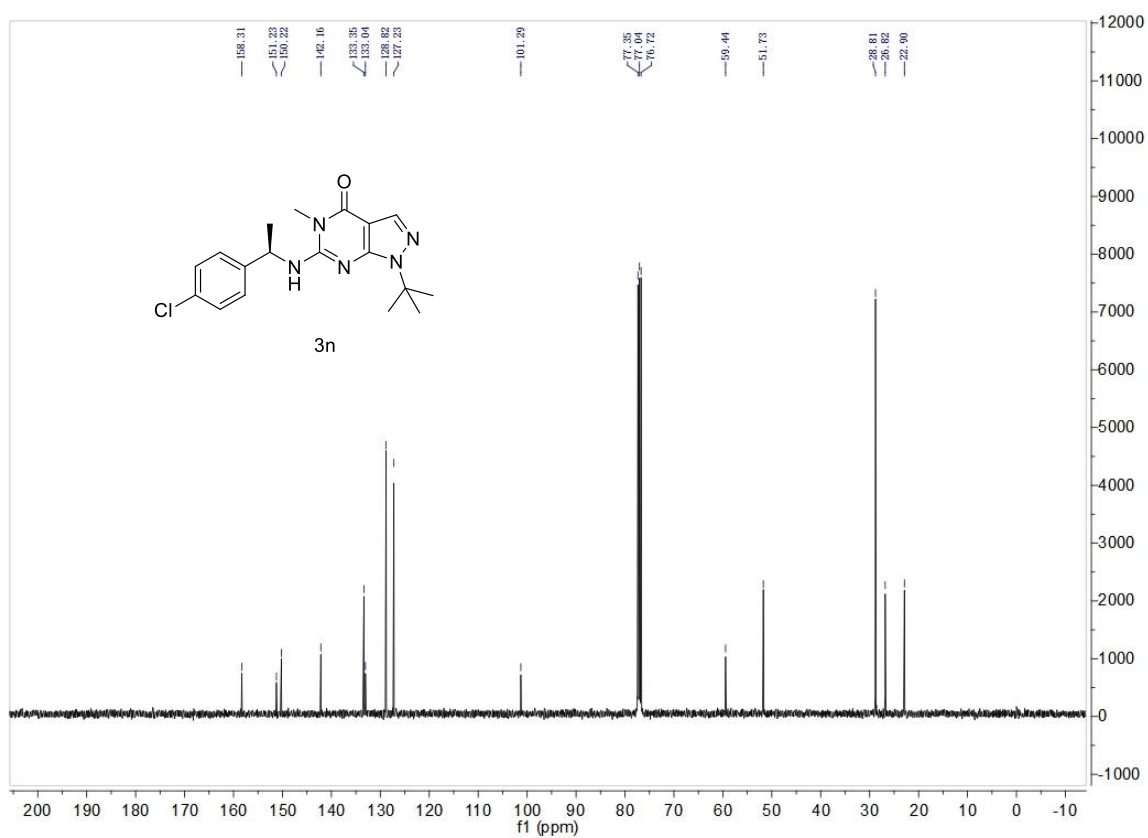

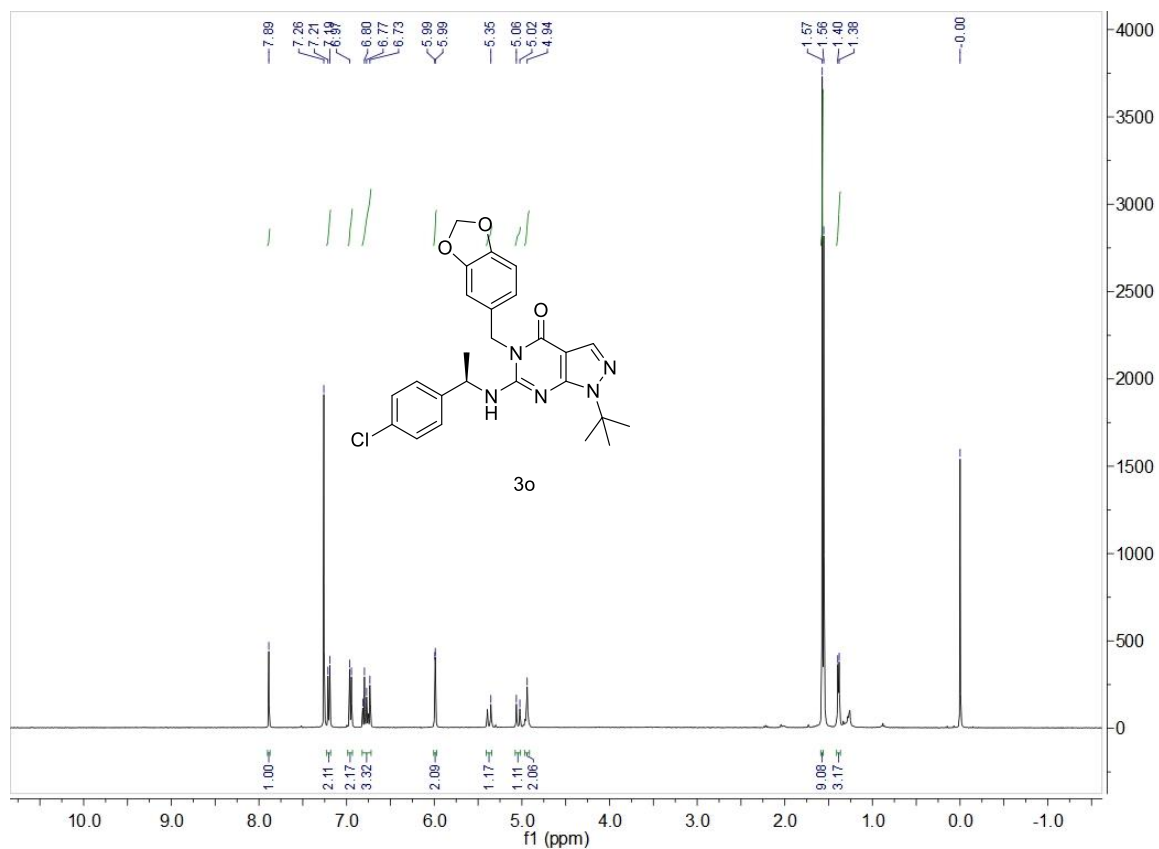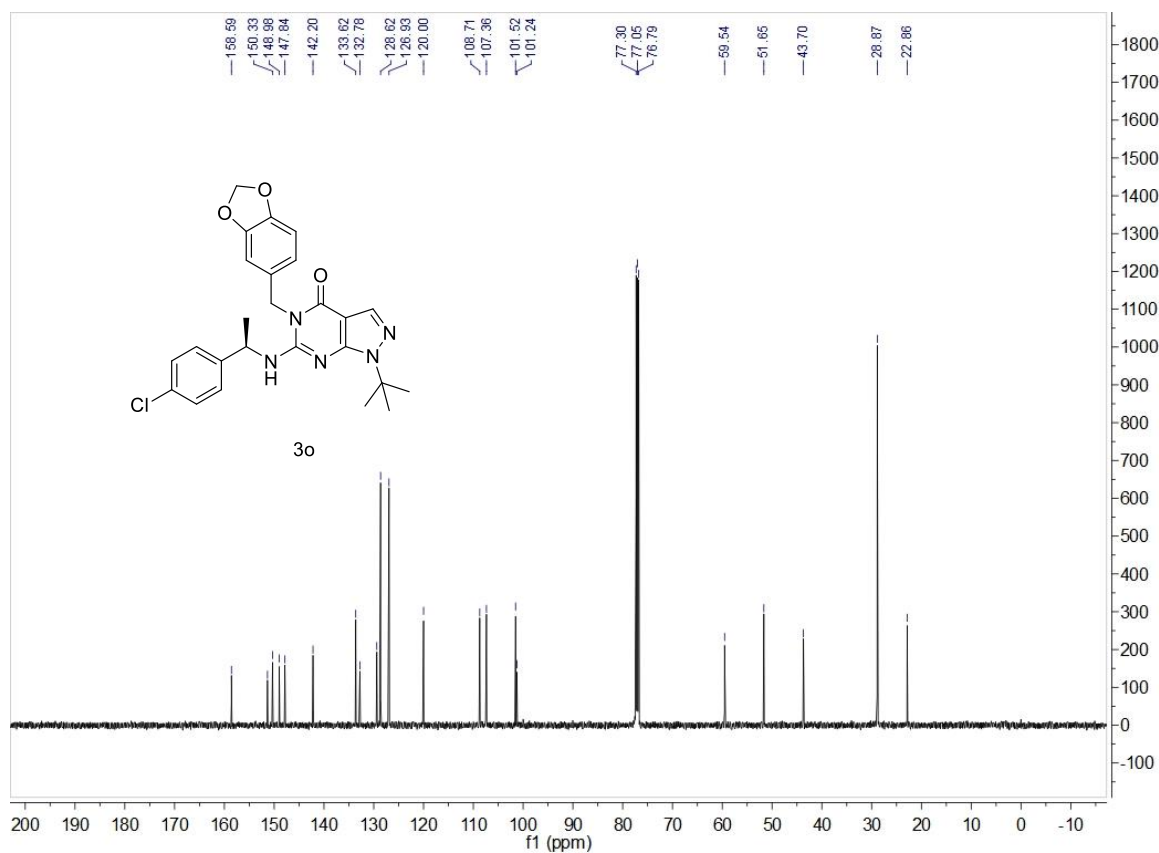

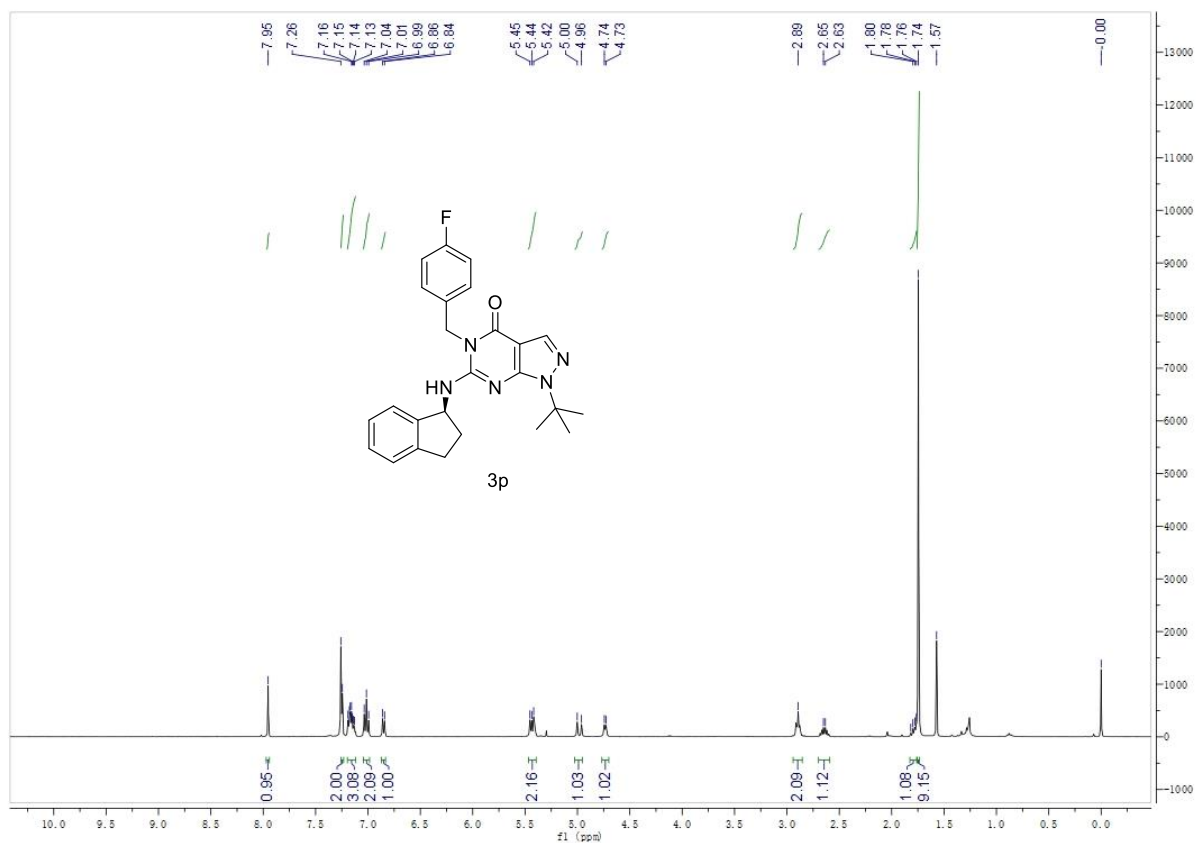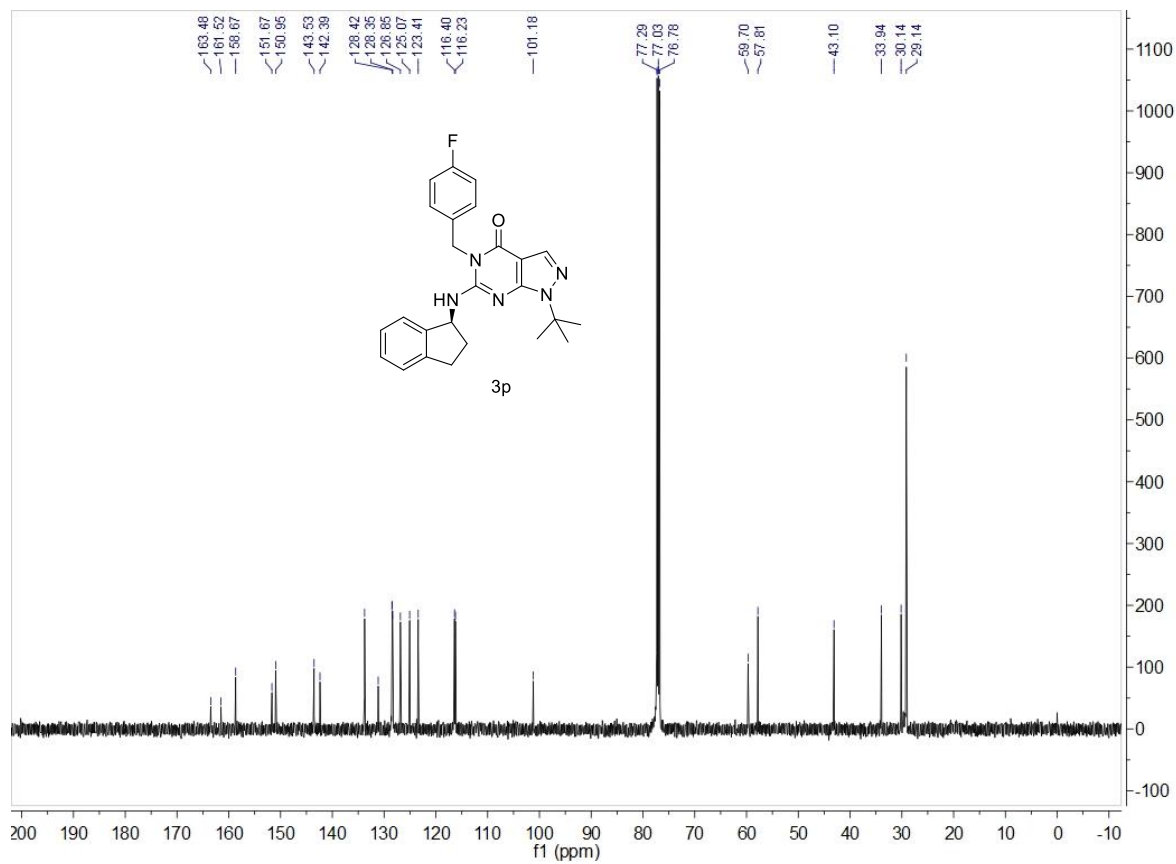

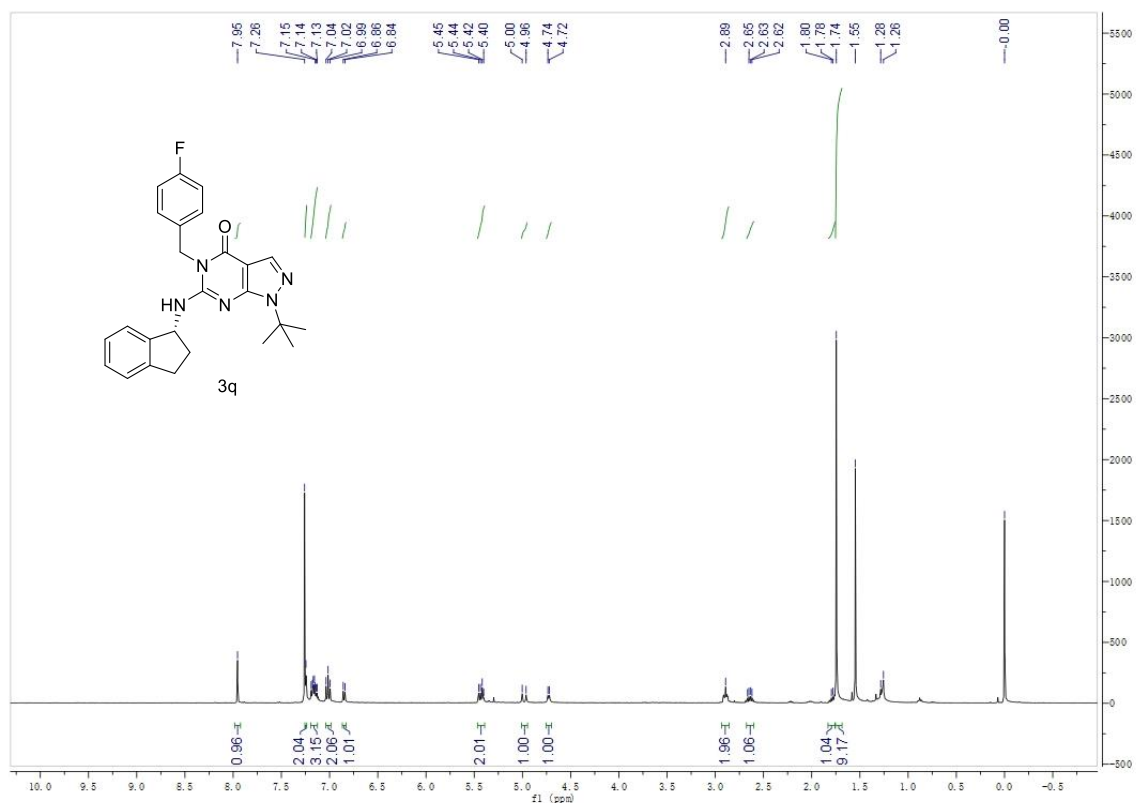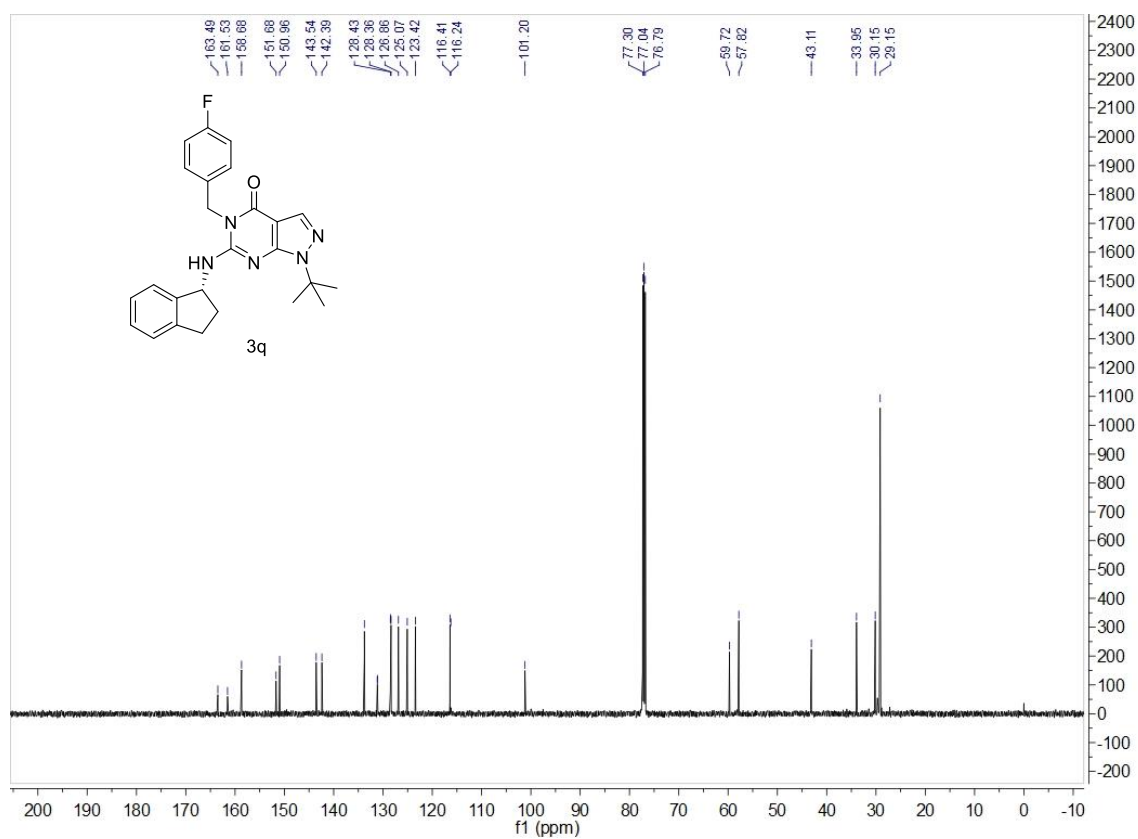



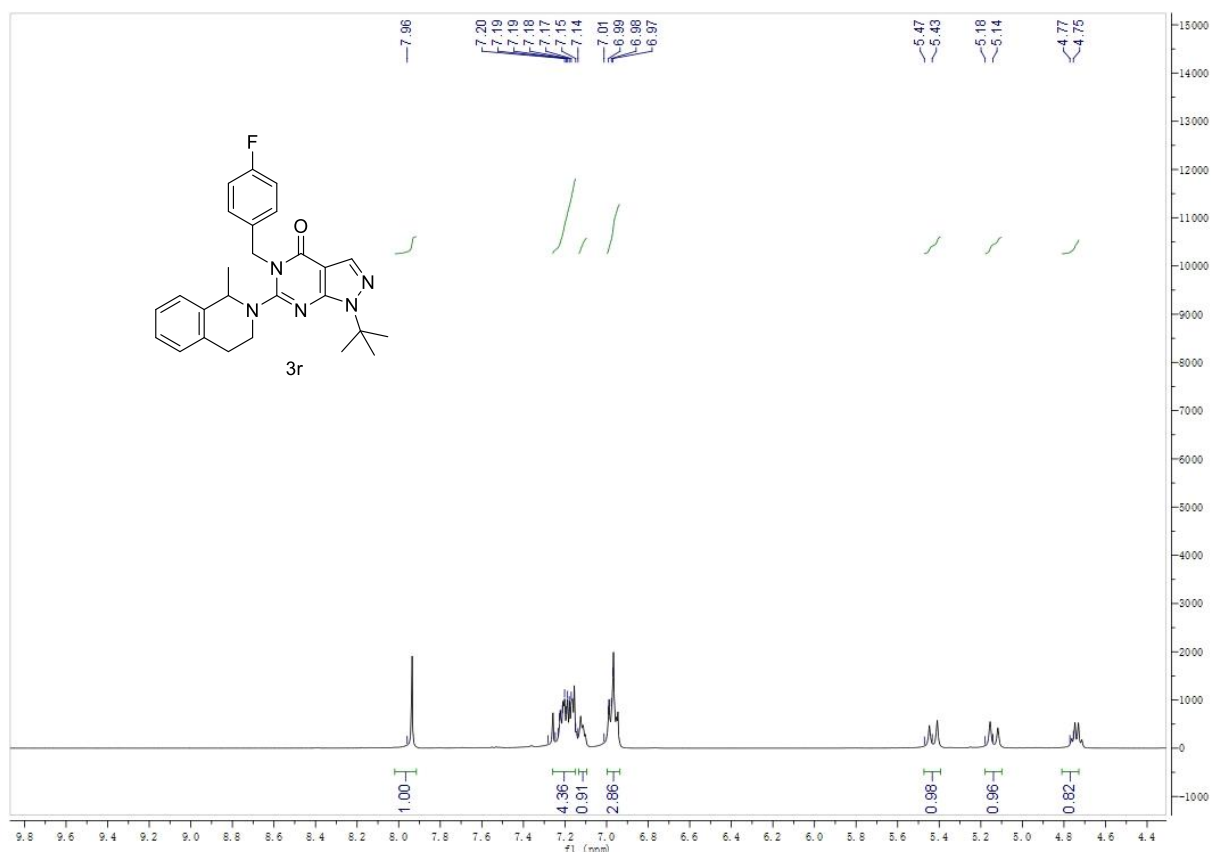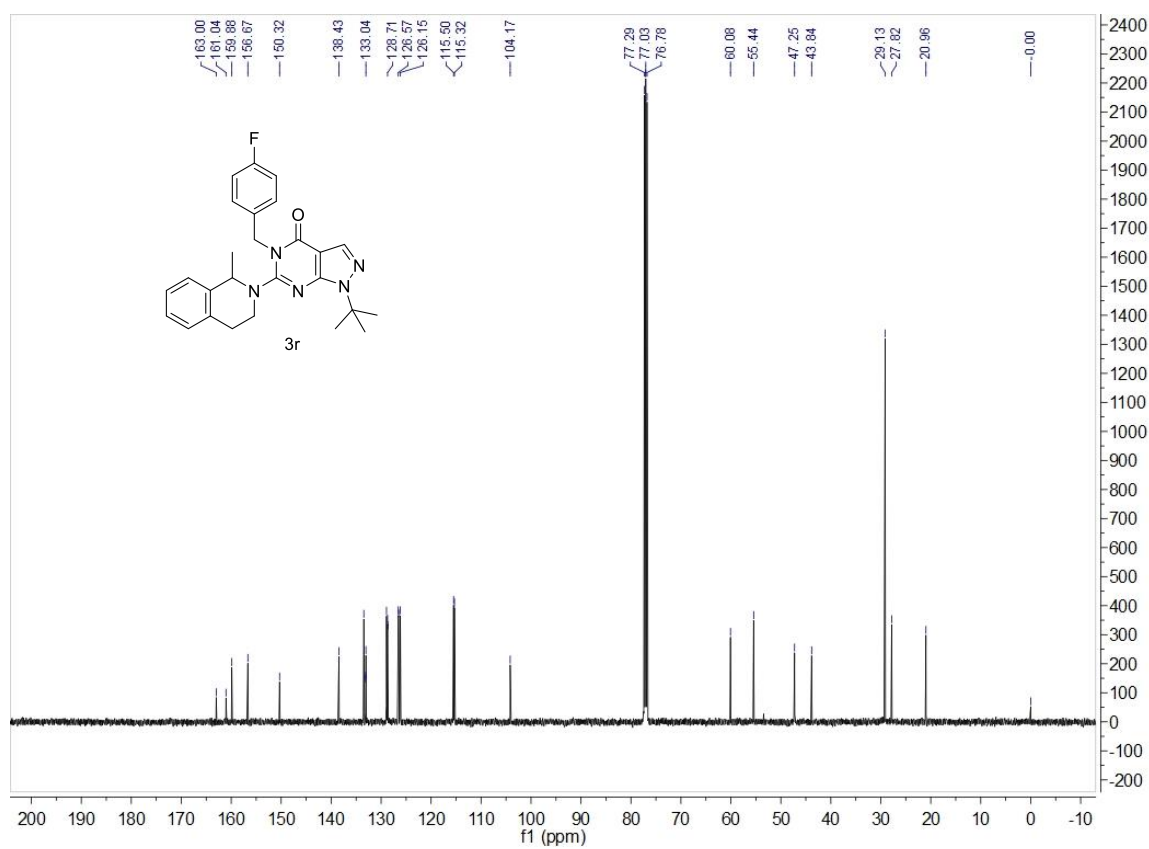

## 9. The HRMS spectrums of the target compounds.

| Elmt | Val. | Min | Max | Elmt | Val. | Min | Max | Elmt | Val. | Min | Max | Use Adduct |
|------|------|-----|-----|------|------|-----|-----|------|------|-----|-----|------------|
| H    | 1    | 0   | 30  | N    | 3    | 0   | 10  | S    | 2    | 0   | 0   | H          |
| 2H   | 1    | 0   | 0   | O    | 2    | 0   | 5   | Cl   | 1    | 1   | 5   | HCOO       |
| B    | 3    | 0   | 0   | F    | 1    | 0   | 0   | Br   | 1    | 0   | 0   | CH3COO     |
| C    | 4    | 0   | 30  | P    | 3    | 0   | 0   | Pd   | 2    | 0   | 0   | Cl         |

Error Margin (ppm): 100  
 HC Ratio: unlimited  
 Max Isotopes: all  
 MSn Iso RI (%): 75.00

DBE Range: -2.0 - 200.0  
 Apply N Rule: no  
 Isotope RI (%): 1.00  
 MSn Logic Mode: AND

Electron Ions: both  
 Use MSn Info: no  
 Isotope Res: 10000  
 Max Results: 500

Event#: 2 MS(E-) Ret. Time : 1.027 Scan#: 156

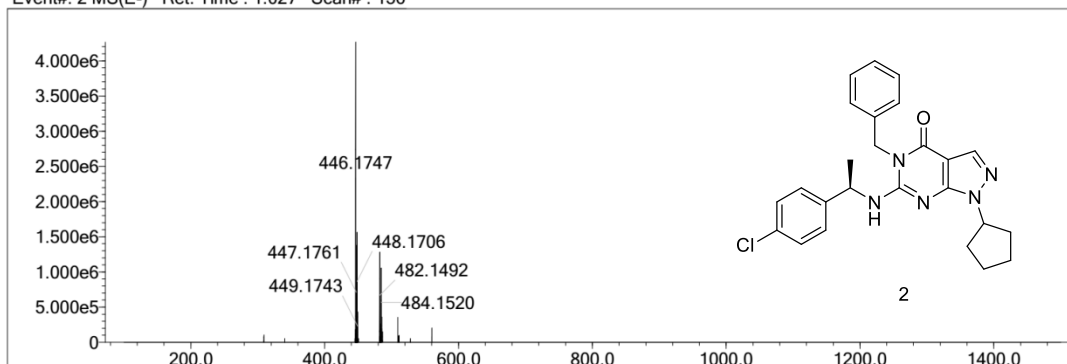

Measured region for 446.1747 m/z

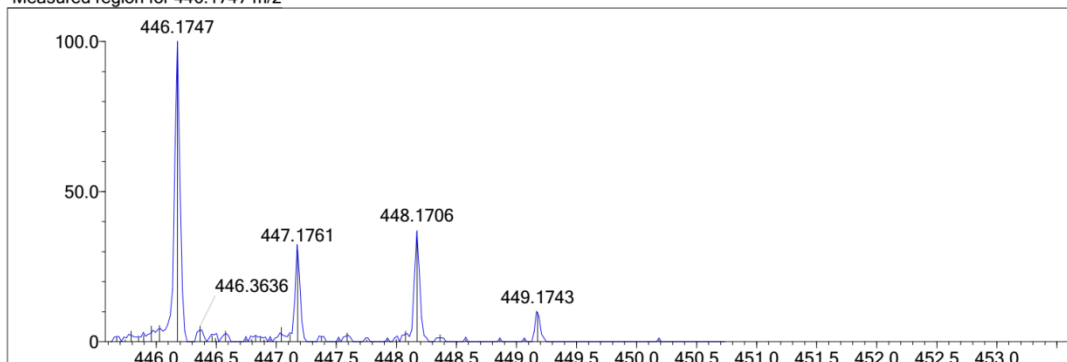

C25 H26 N5 O Cl [M-H]- : Predicted region for 446.1753 m/z

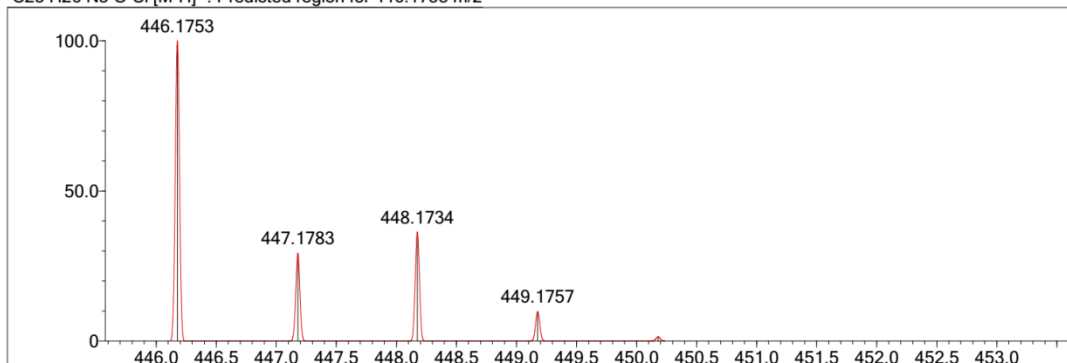

| Rank | Score | Formula (M)     | Ion    | Meas. m/z | Pred. m/z | Df. (mDa) | Df. (ppm) | Iso   | DBE  |
|------|-------|-----------------|--------|-----------|-----------|-----------|-----------|-------|------|
| 1    | 87.54 | C25 H26 N5 O Cl | [M-H]- | 446.1747  | 446.1753  | -0.6      | -1.34     | 88.29 | 15.0 |

| Elmt | Val. | Min | Max | Elmt | Val. | Min | Max | Elmt | Val. | Min | Max | Use Adduct |
|------|------|-----|-----|------|------|-----|-----|------|------|-----|-----|------------|
| H    | 1    | 0   | 30  | N    | 3    | 0   | 10  | S    | 2    | 0   | 0   | H          |
| 2H   | 1    | 0   | 0   | O    | 2    | 0   | 5   | Cl   | 1    | 1   | 5   | HCOO       |
| B    | 3    | 0   | 0   | F    | 1    | 0   | 0   | Br   | 1    | 0   | 0   | CH3COO     |
| C    | 4    | 0   | 30  | P    | 3    | 0   | 0   | Pd   | 2    | 0   | 0   | Cl         |

Error Margin (ppm): 100  
 HC Ratio: unlimited  
 Max Isotopes: all  
 MSn Iso RI (%): 75.00

DBE Range: -2.0 - 200.0  
 Apply N Rule: no  
 Isotope RI (%): 1.00  
 MSn Logic Mode: AND

Electron Ions: both  
 Use MSn Info: no  
 Isotope Res: 10000  
 Max Results: 500

Event#: 2 MS(E-) Ret. Time : 0.987 Scan#: 150

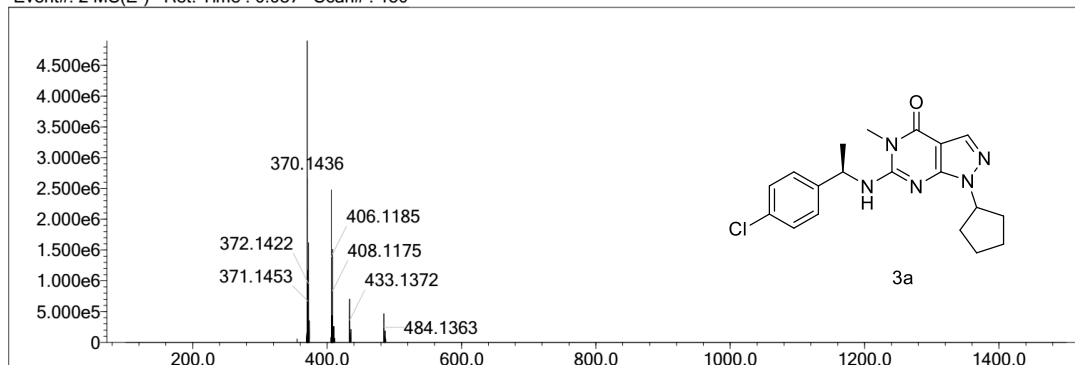

Measured region for 370.1436 m/z

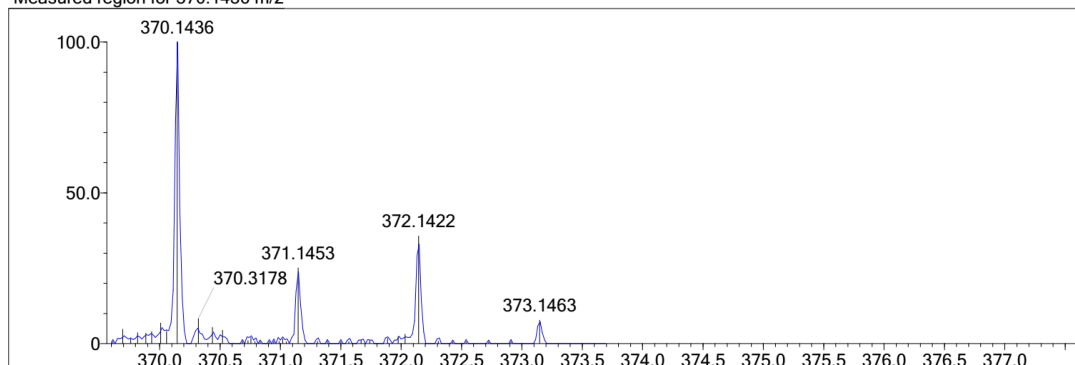

C19 H22 N5 O Cl [M-H]<sup>-</sup> : Predicted region for 370.1440 m/z

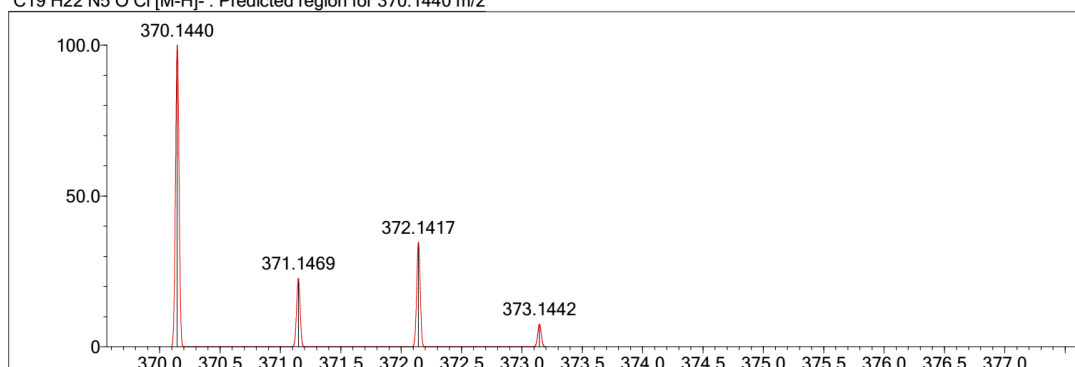

| Rank | Score | Formula (M)     | Ion                | Meas. m/z | Pred. m/z | Df. (mDa) | Df. (ppm) | Iso   | DBE  |
|------|-------|-----------------|--------------------|-----------|-----------|-----------|-----------|-------|------|
| 1    | 93.26 | C19 H22 N5 O Cl | [M-H] <sup>-</sup> | 370.1436  | 370.1440  | -0.4      | -1.08     | 93.45 | 11.0 |

| Elmt | Val. | Min | Max | Elmt | Val. | Min | Max | Elmt | Val. | Min | Max | Use Adduct |
|------|------|-----|-----|------|------|-----|-----|------|------|-----|-----|------------|
| H    | 1    | 0   | 30  | N    | 3    | 0   | 10  | S    | 2    | 0   | 0   | H          |
| 2H   | 1    | 0   | 0   | O    | 2    | 0   | 5   | Cl   | 1    | 1   | 5   | HCOO       |
| B    | 3    | 0   | 0   | F    | 1    | 0   | 0   | Br   | 1    | 0   | 0   | CH3COO     |
| C    | 4    | 0   | 30  | P    | 3    | 0   | 0   | Pd   | 2    | 0   | 0   | Cl         |

Error Margin (ppm): 100  
 HC Ratio: unlimited  
 Max Isotopes: all  
 MSn Iso RI (%): 75.00

DBE Range: -2.0 - 200.0  
 Apply N Rule: no  
 Isotope RI (%): 1.00  
 MSn Logic Mode: AND

Electron Ions: both  
 Use MSn Info: no  
 Isotope Res: 10000  
 Max Results: 500

Event#: 2 MS(E-) Ret. Time : 1.067 Scan#: 162

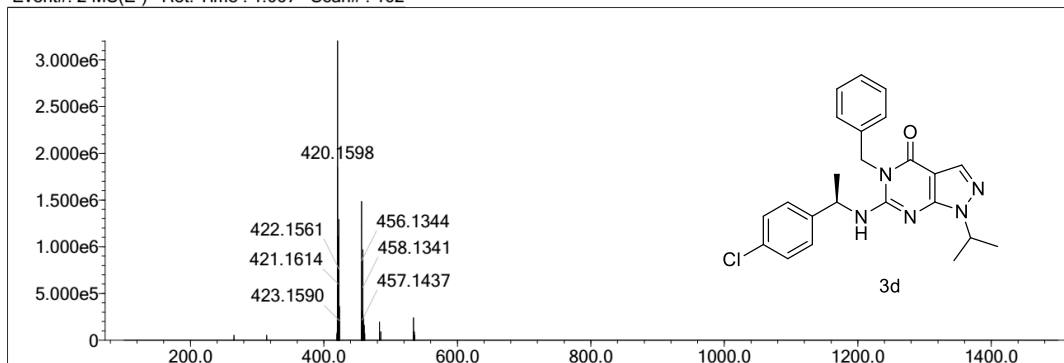

Measured region for 420.1598 m/z

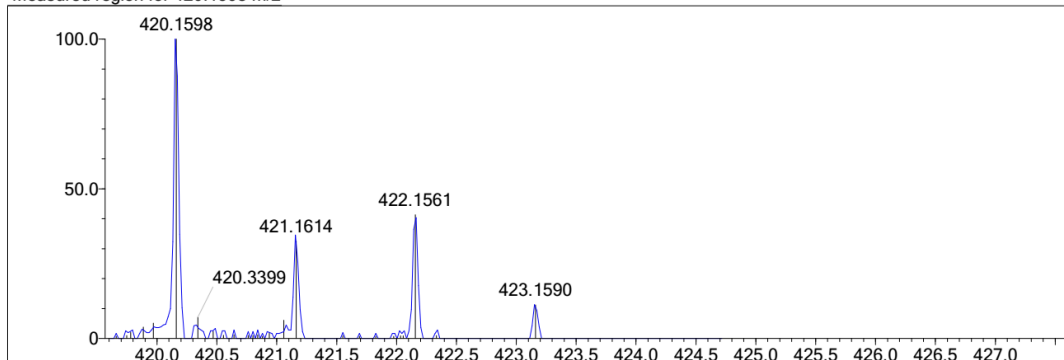

C23 H24 N5 O Cl [M-H]- : Predicted region for 420.1597 m/z

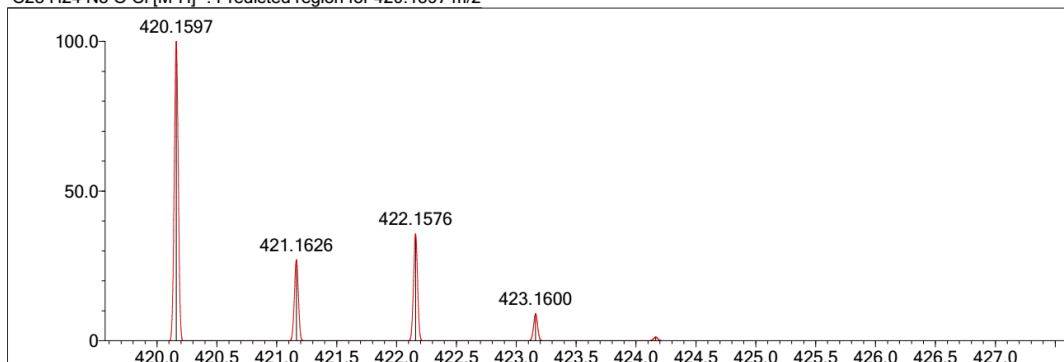

| Rank | Score | Formula (M)     | Ion    | Meas. m/z | Pred. m/z | Df. (mDa) | Df. (ppm) | Iso   | DBE  |
|------|-------|-----------------|--------|-----------|-----------|-----------|-----------|-------|------|
| 1    | 78.05 | C23 H24 N5 O Cl | [M-H]- | 420.1598  | 420.1597  | 0.1       | 0.24      | 78.05 | 14.0 |

| Elmt | Val. | Min | Max | Elmt | Val. | Min | Max | Elmt | Val. | Min | Max | Use Adduct |
|------|------|-----|-----|------|------|-----|-----|------|------|-----|-----|------------|
| H    | 1    | 0   | 30  | N    | 3    | 0   | 10  | S    | 2    | 0   | 0   | H          |
| 2H   | 1    | 0   | 0   | O    | 2    | 0   | 5   | Cl   | 1    | 1   | 5   | HCOO       |
| B    | 3    | 0   | 0   | F    | 1    | 0   | 0   | Br   | 1    | 0   | 0   | CH3COO     |
| C    | 4    | 0   | 30  | P    | 3    | 0   | 0   | Pd   | 2    | 0   | 0   | Cl         |

Error Margin (ppm): 100  
 HC Ratio: unlimited  
 Max Isotopes: all  
 MSn Iso RI (%): 75.00

DBE Range: -2.0 - 200.0  
 Apply N Rule: no  
 Isotope RI (%): 1.00  
 MSn Logic Mode: AND

Electron Ions: both  
 Use MSn Info: no  
 Isotope Res: 10000  
 Max Results: 500

Event#: 2 MS(E-) Ret. Time : 0.840 Scan#: 128

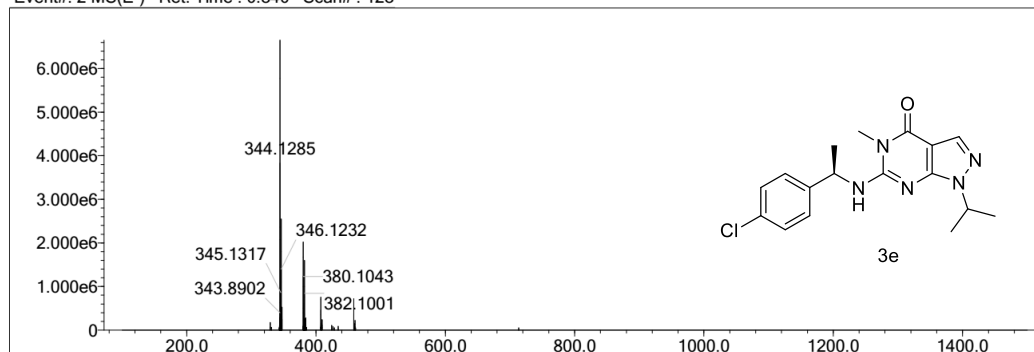

Measured region for 344.1285 m/z

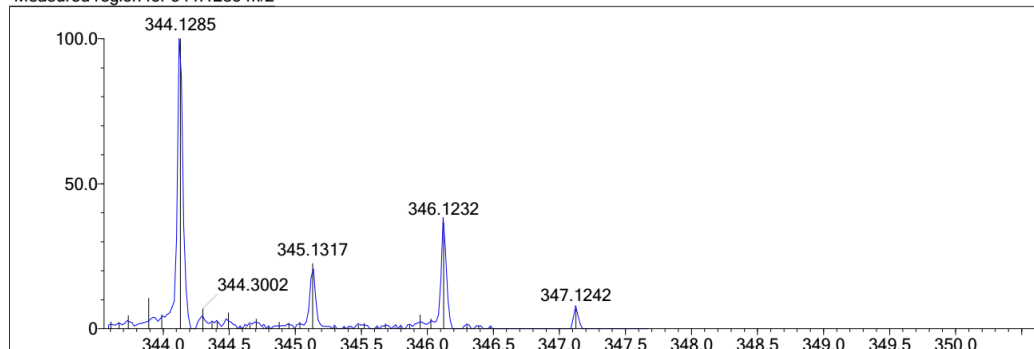

C17 H20 N5 O Cl [M-H]- : Predicted region for 344.1284 m/z

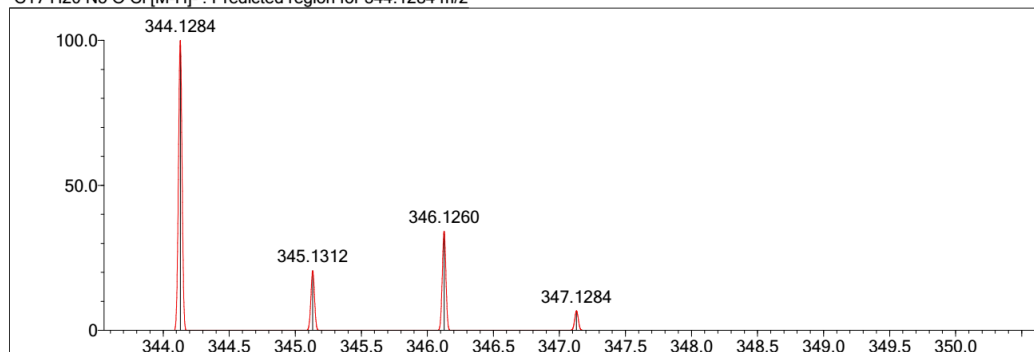

| Rank | Score | Formula (M)     | Ion    | Meas. m/z | Pred. m/z | Df. (mDa) | Df. (ppm) | Iso   | DBE  |
|------|-------|-----------------|--------|-----------|-----------|-----------|-----------|-------|------|
| 3    | 75.88 | C17 H20 N5 O Cl | [M-H]- | 344.1285  | 344.1284  | 0.1       | 0.29      | 75.88 | 10.0 |

| Elmt | Val. | Min | Max | Elmt | Val. | Min | Max | Elmt | Val. | Min | Max | Use Adduct |
|------|------|-----|-----|------|------|-----|-----|------|------|-----|-----|------------|
| H    | 1    | 0   | 30  | N    | 3    | 2   | 10  | S    | 2    | 0   | 0   | H          |
| 2H   | 1    | 0   | 0   | O    | 2    | 2   | 4   | Cl   | 1    | 0   | 5   | HCOO       |
| B    | 3    | 0   | 0   | F    | 1    | 0   | 0   | Br   | 1    | 0   | 0   | CH3COO     |
| C    | 4    | 0   | 30  | P    | 3    | 0   | 0   | Pd   | 2    | 0   | 0   | Cl         |

Error Margin (ppm): 100  
 HC Ratio: unlimited  
 Max Isotopes: all  
 MSn Iso RI (%): 75.00

DBE Range: -2.0 - 200.0  
 Apply N Rule: no  
 Isotope RI (%): 1.00  
 MSn Logic Mode: AND

Electron Ions: both  
 Use MSn Info: no  
 Isotope Res: 10000  
 Max Results: 500

Event#: 2 MS(E-) Ret. Time : 0.893 Scan# : 136

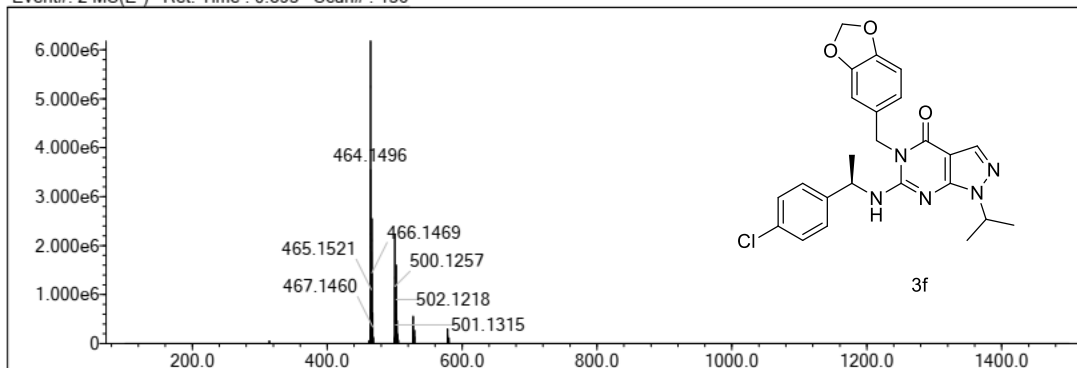

Measured region for 464.1496 m/z

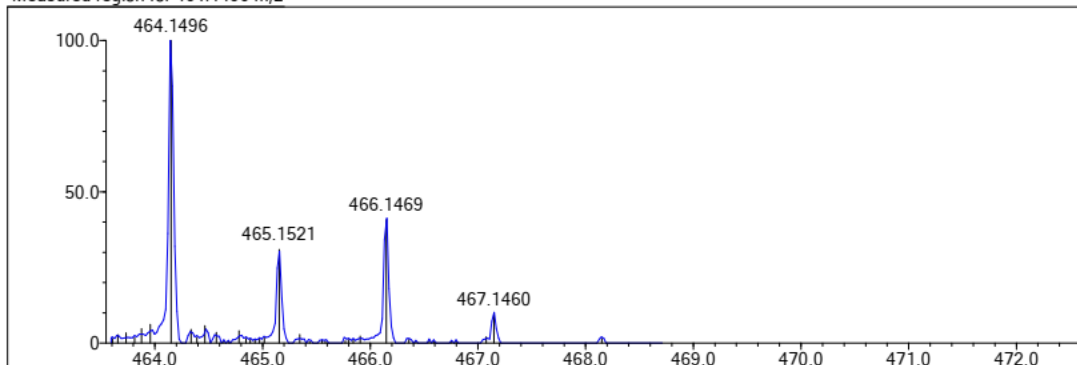

C24 H24 N5 O3 Cl [M-H]- : Predicted region for 464.1495 m/z

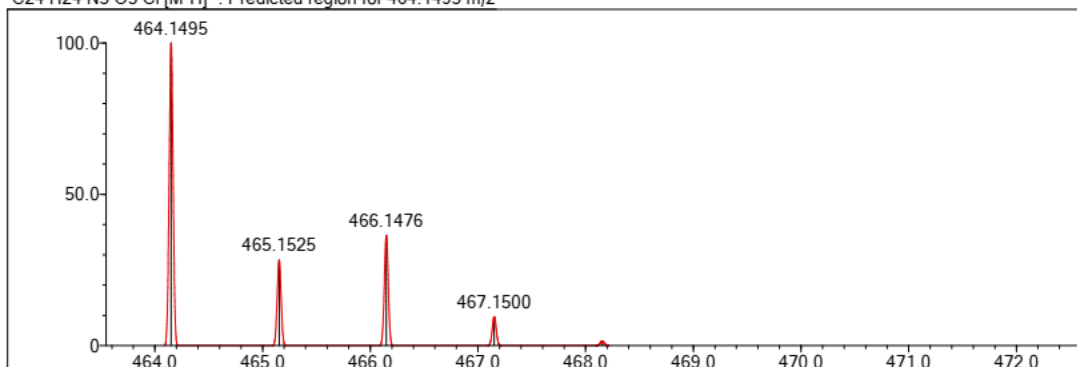

| Rank | Score | Formula (M)      | Ion    | Meas. m/z | Pred. m/z | Df. (mDa) | Df. (ppm) | Iso   | DBE  |
|------|-------|------------------|--------|-----------|-----------|-----------|-----------|-------|------|
| 4    | 81.28 | C24 H24 N5 O3 Cl | [M-H]- | 464.1496  | 464.1495  | 0.1       | 0.22      | 81.28 | 15.0 |



| Elmt | Val. | Min | Max | Elmt | Val. | Min | Max | Elmt | Val. | Min | Max | Use Adduct |
|------|------|-----|-----|------|------|-----|-----|------|------|-----|-----|------------|
| H    | 1    | 0   | 26  | O    | 2    | 0   | 1   | Se   | 2    | 0   | 0   | H          |
| 2H   | 1    | 0   | 0   | F    | 1    | 0   | 0   | Br   | 1    | 0   | 0   |            |
| B    | 3    | 0   | 0   | P    | 3    | 0   | 0   | Pt   | 2    | 0   | 0   |            |
| C    | 4    | 0   | 25  | S    | 2    | 0   | 0   |      |      |     |     |            |
| N    | 3    | 0   | 6   | Cl   | 1    | 0   | 1   |      |      |     |     |            |

Error Margin (ppm): 20  
 HC Ratio: unlimited  
 Max Isotopes: all  
 MSn Iso RI (%): 75.00

DBE Range: not fixed  
 Apply N Rule: no  
 Isotope RI (%): 1.00  
 MSn Logic Mode: AND

Electron Ions: both  
 Use MSn Info: no  
 Isotope Res: 10000  
 Max Results: 200

Event#: 1 MS(E+) Ret. Time : 1.653 Scan#: 249

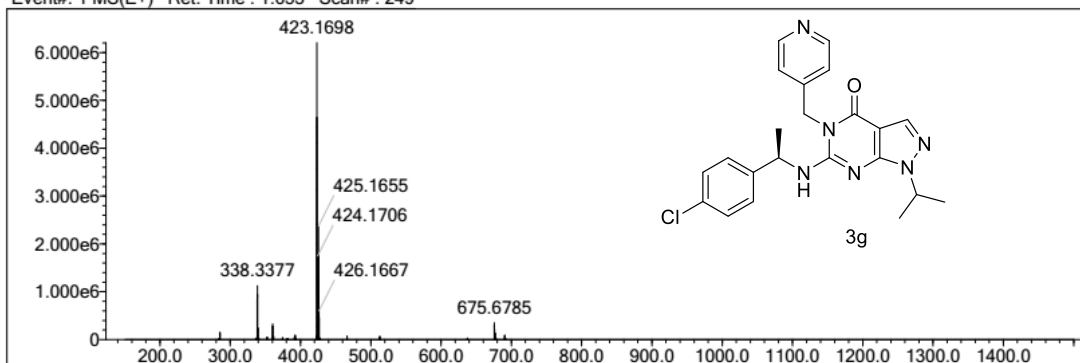

Measured region for 423.1698 m/z

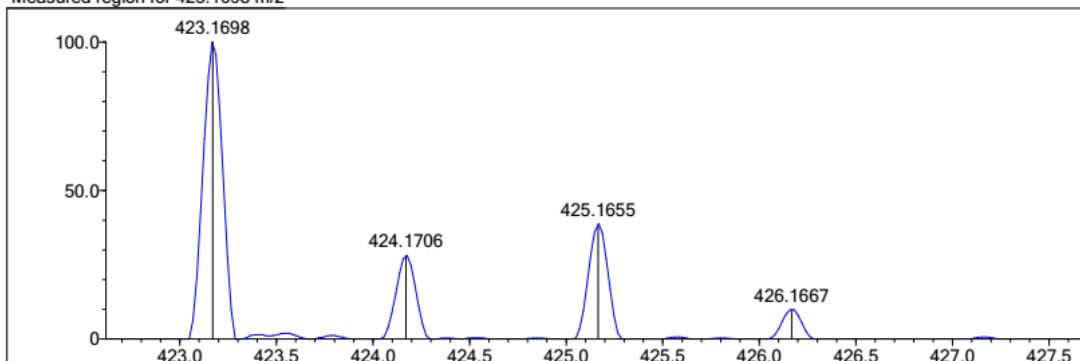

C22 H23 N6 O Cl [M+H]<sup>+</sup> : Predicted region for 423.1695 m/z

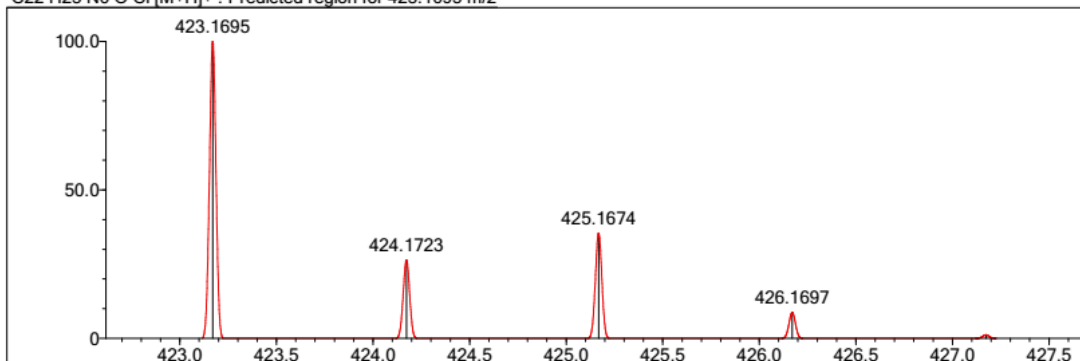

| Rank | Score | Formula (M)     | Ion                | Meas. m/z | Pred. m/z | Df. (mDa) | Df. (ppm) | Iso   | DBE  |
|------|-------|-----------------|--------------------|-----------|-----------|-----------|-----------|-------|------|
| 1    | 81.59 | C22 H23 N6 O Cl | [M+H] <sup>+</sup> | 423.1698  | 423.1695  | 0.3       | 0.71      | 81.59 | 14.0 |

| Elmt | Val. | Min | Max | Elmt | Val. | Min | Max | Elmt | Val. | Min | Max | Use Adduct |
|------|------|-----|-----|------|------|-----|-----|------|------|-----|-----|------------|
| H    | 1    | 0   | 25  | O    | 2    | 0   | 1   | Se   | 2    | 0   | 0   | H          |
| 2H   | 1    | 0   | 0   | F    | 1    | 0   | 0   | Br   | 1    | 0   | 0   | Na         |
| B    | 3    | 0   | 0   | P    | 3    | 0   | 0   | Pt   | 2    | 0   | 0   |            |
| C    | 4    | 0   | 25  | S    | 2    | 0   | 1   |      |      |     |     |            |
| N    | 3    | 0   | 6   | Cl   | 1    | 0   | 1   |      |      |     |     |            |

Error Margin (ppm): 20

HC Ratio: unlimited

Max Isotopes: all

MSn Iso RI (%): 75.00

DBE Range: not fixed

Apply N Rule: no

Isotope RI (%): 1.00

MSn Logic Mode: AND

Electron Ions: both

Use MSn Info: no

Isotope Res: 10000

Max Results: 200

Event#: 1 MS(E+) Ret. Time : 2.280 Scan#: 343

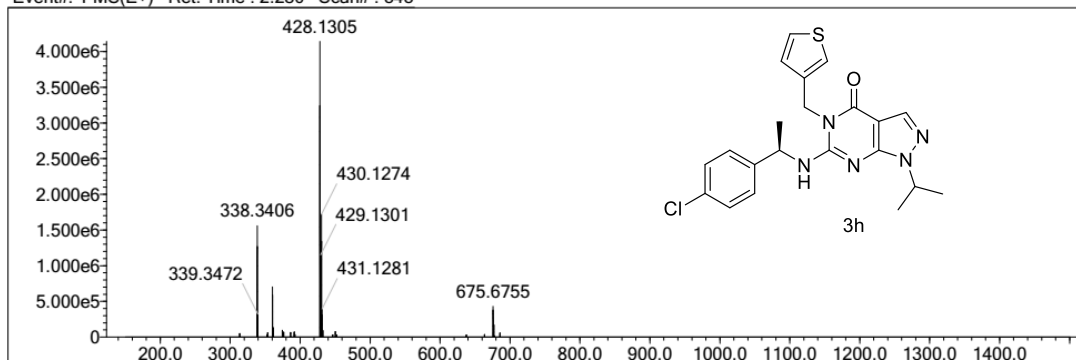

Measured region for 428.1305 m/z

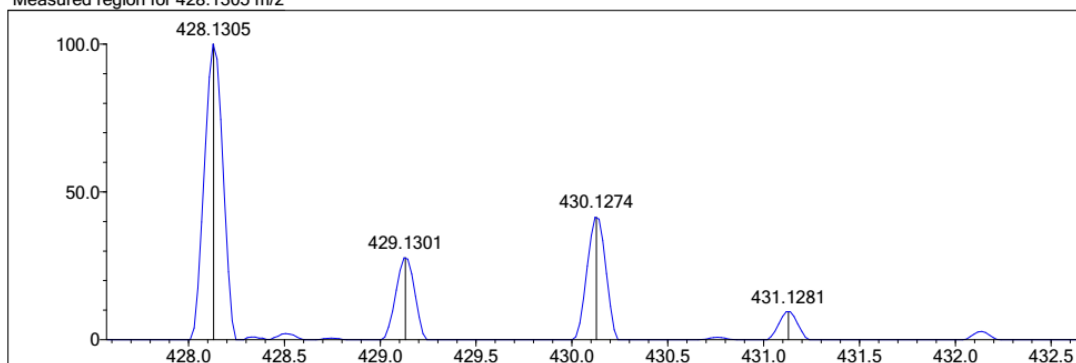

C21 H22 N5 O S Cl [M+H]<sup>+</sup> : Predicted region for 428.1306 m/z

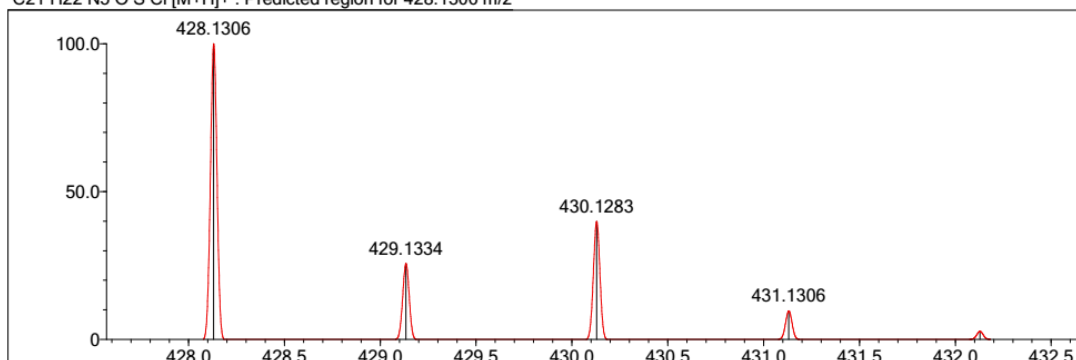

| Rank | Score | Formula (M)       | Ion                | Meas. m/z | Pred. m/z | Df. (mDa) | Df. (ppm) | Iso   | DBE  |
|------|-------|-------------------|--------------------|-----------|-----------|-----------|-----------|-------|------|
| 1    | 90.69 | C21 H22 N5 O S Cl | [M+H] <sup>+</sup> | 428.1305  | 428.1306  | -0.1      | -0.23     | 90.69 | 13.0 |

Data File: \\Deep-20160624\\data1\\WuYiNuo\\LML\\LWLM1959.lcd

| Elmt | Val. | Min | Max | Elmt | Val. | Min | Max | Elmt | Val. | Min | Max | Use Adduct |
|------|------|-----|-----|------|------|-----|-----|------|------|-----|-----|------------|
| H    | 1    | 0   | 30  | N    | 3    | 0   | 10  | S    | 2    | 0   | 0   | H          |
| 2H   | 1    | 0   | 0   | O    | 2    | 0   | 5   | Cl   | 1    | 1   | 5   | HCOO       |
| B    | 3    | 0   | 0   | F    | 1    | 0   | 0   | Br   | 1    | 0   | 0   | CH3COO     |
| C    | 4    | 0   | 30  | P    | 3    | 0   | 0   | Pd   | 2    | 0   | 0   | Cl         |

Error Margin (ppm): 100  
 HC Ratio: unlimited  
 Max Isotopes: all  
 MSn Iso RI (%): 75.00

DBE Range: -2.0 - 200.0  
 Apply N Rule: no  
 Isotope RI (%): 1.00  
 MSn Logic Mode: AND

Electron Ions: both  
 Use MSn Info: no  
 Isotope Res: 10000  
 Max Results: 500

Event#: 2 MS(E-) Ret. Time : 1.040 Scan#: 158

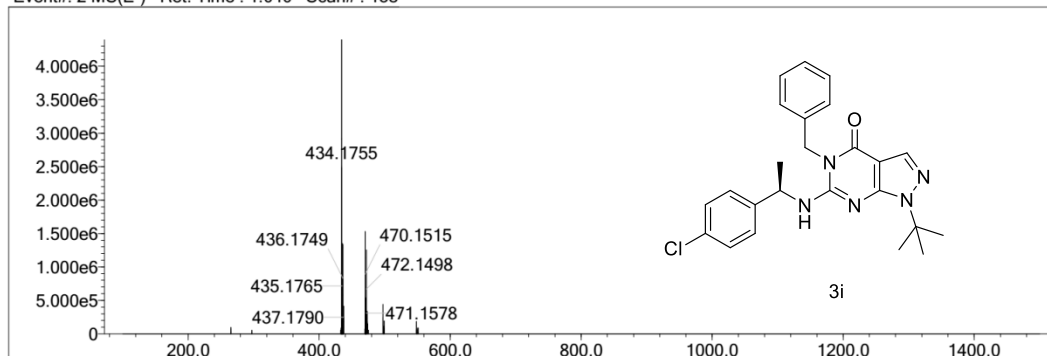

Measured region for 434.1755 m/z

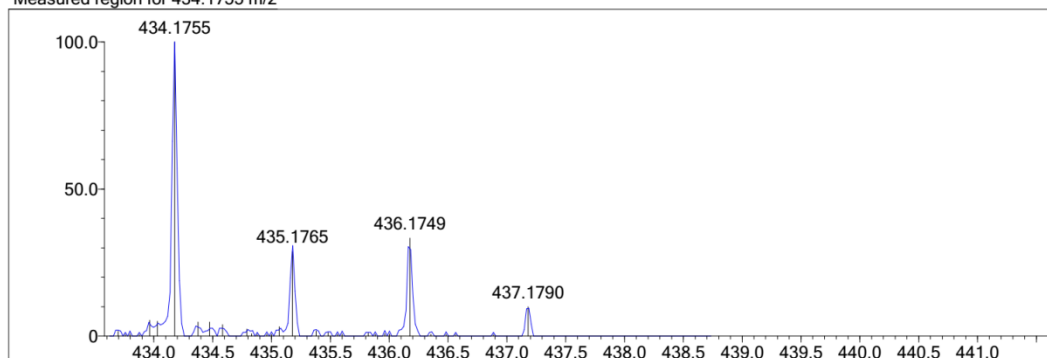

C24 H26 N5 O Cl [M-H]- : Predicted region for 434.1753 m/z

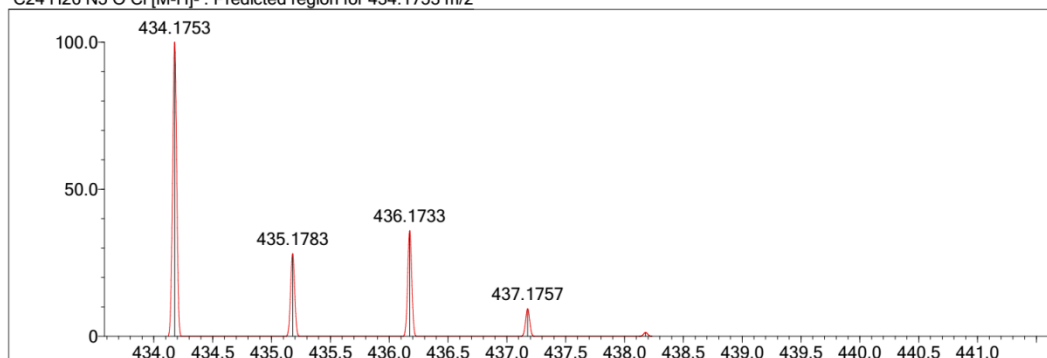

| Rank | Score | Formula (M)     | Ion    | Meas. m/z | Pred. m/z | Df. (mDa) | Df. (ppm) | Iso   | DBE  |
|------|-------|-----------------|--------|-----------|-----------|-----------|-----------|-------|------|
| 1    | 83.07 | C24 H26 N5 O Cl | [M-H]- | 434.1755  | 434.1753  | 0.2       | 0.46      | 83.07 | 14.0 |

| Elmt | Val. | Min | Max | Elmt | Val. | Min | Max | Elmt | Val. | Min | Max | Use Adduct |
|------|------|-----|-----|------|------|-----|-----|------|------|-----|-----|------------|
| H    | 1    | 0   | 51  | O    | 2    | 0   | 5   | Br   | 1    | 0   | 0   | H          |
| 2H   | 1    | 0   | 0   | F    | 1    | 0   | 5   | Pd   | 2    | 0   | 0   |            |
| B    | 3    | 0   | 0   | P    | 3    | 0   | 0   | I    | 3    | 0   | 0   |            |
| C    | 4    | 0   | 40  | S    | 2    | 0   | 0   |      |      |     |     |            |
| N    | 3    | 1   | 10  | Cl   | 1    | 0   | 5   |      |      |     |     |            |

Error Margin (ppm): 20  
 HC Ratio: unlimited  
 Max Isotopes: all  
 MSn Iso RI (%): 75.00

DBE Range: -2.0 - 200.0  
 Apply N Rule: no  
 Isotope RI (%): 1.00  
 MSn Logic Mode: AND

Electron Ions: both  
 Use MSn Info: no  
 Isotope Res: 10000  
 Max Results: 500

Event#: 2 MS(E-) Ret. Time : 0.987 Scan#: 150

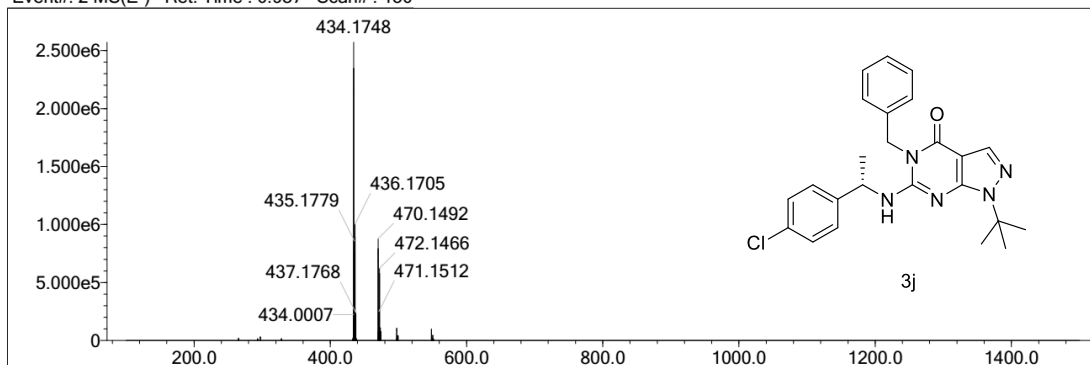

Measured region for 434.1748 m/z

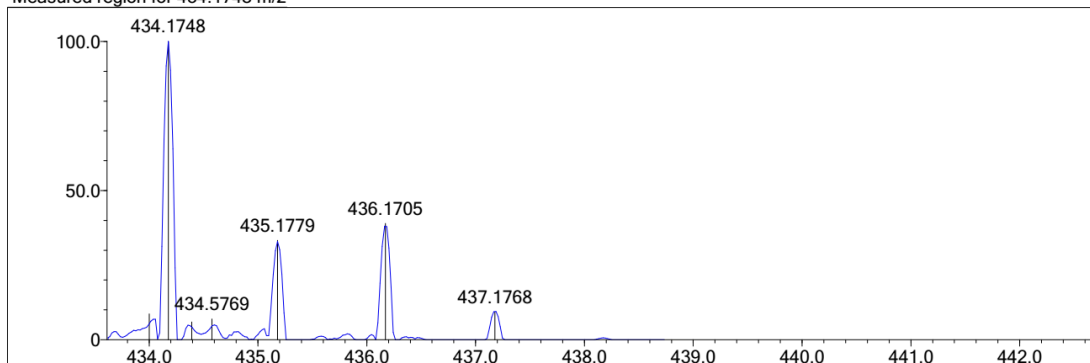

C24 H26 N5 O Cl [M-H]<sup>-</sup> : Predicted region for 434.1753 m/z

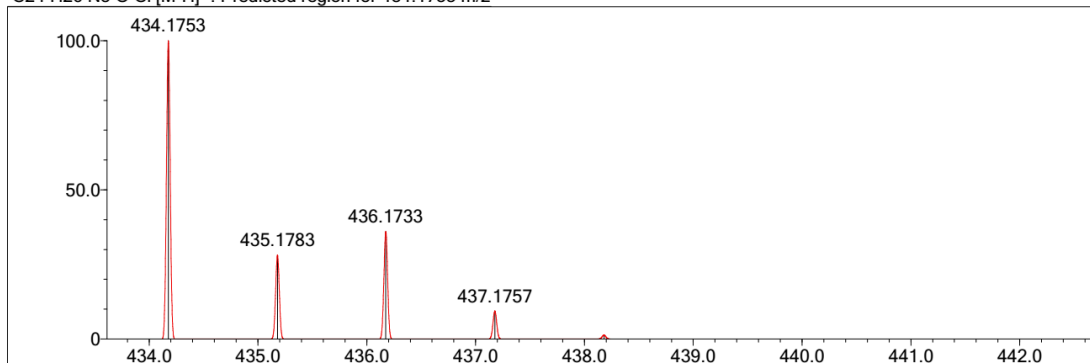

| Rank | Score | Formula (M)     | Ion                | Meas. m/z | Pred. m/z | Df. (mDa) | Df. (ppm) | Iso   | DBE  |
|------|-------|-----------------|--------------------|-----------|-----------|-----------|-----------|-------|------|
| 1    | 87.59 | C24 H26 N5 O Cl | [M-H] <sup>-</sup> | 434.1748  | 434.1753  | -0.5      | -1.15     | 87.92 | 14.0 |

| Elmt | Val. | Min | Max | Elmt | Val. | Min | Max | Elmt | Val. | Min | Max | Use Adduct |
|------|------|-----|-----|------|------|-----|-----|------|------|-----|-----|------------|
| H    | 1    | 0   | 51  | O    | 2    | 0   | 5   | Br   | 1    | 0   | 0   | H          |
| 2H   | 1    | 0   | 0   | F    | 1    | 0   | 5   | Pd   | 2    | 0   | 0   |            |
| B    | 3    | 0   | 0   | P    | 3    | 0   | 0   | I    | 3    | 0   | 0   |            |
| C    | 4    | 0   | 40  | S    | 2    | 0   | 0   |      |      |     |     |            |
| N    | 3    | 1   | 10  | Cl   | 1    | 0   | 5   |      |      |     |     |            |

Error Margin (ppm): 20  
 HC Ratio: unlimited  
 Max Isotopes: all  
 MSn Iso RI (%): 75.00

DBE Range: -2.0 - 200.0  
 Apply N Rule: no  
 Isotope RI (%): 1.00  
 MSn Logic Mode: AND

Electron Ions: both  
 Use MSn Info: no  
 Isotope Res: 10000  
 Max Results: 500

Event#: 2 MS(E-) Ret. Time : 0.880 Scan#: 134

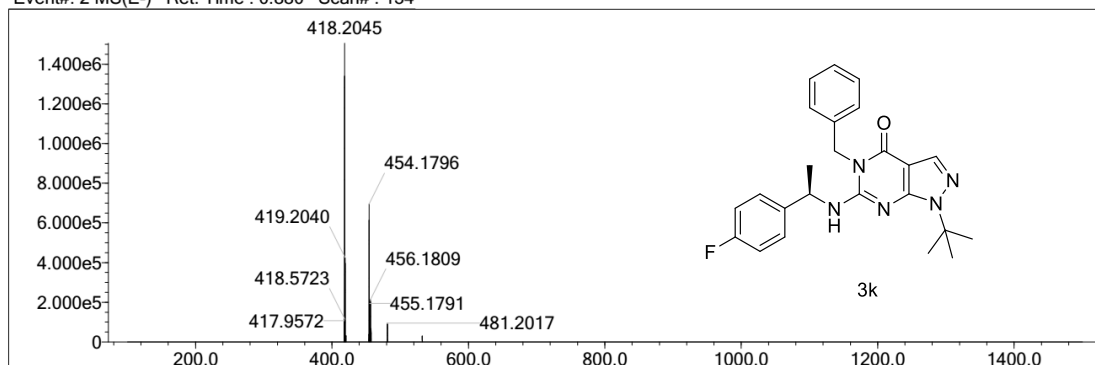

Measured region for 418.2045 m/z

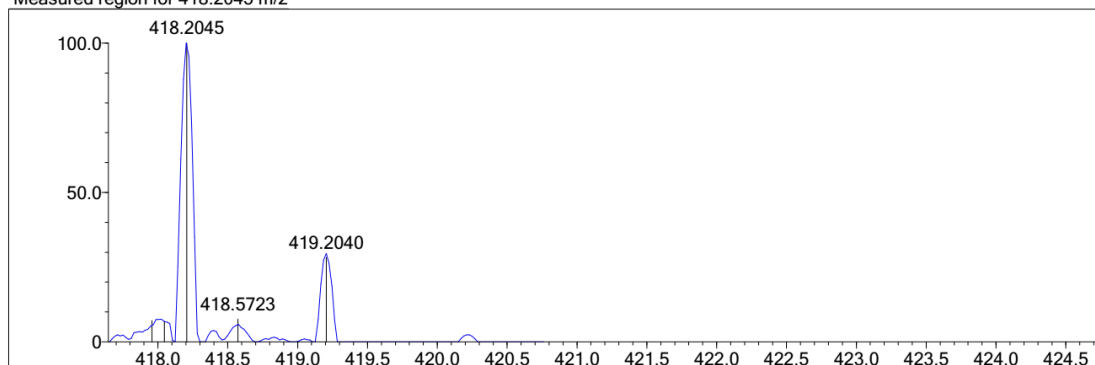

C24 H26 N5 O F [M-H]- : Predicted region for 418.2049 m/z

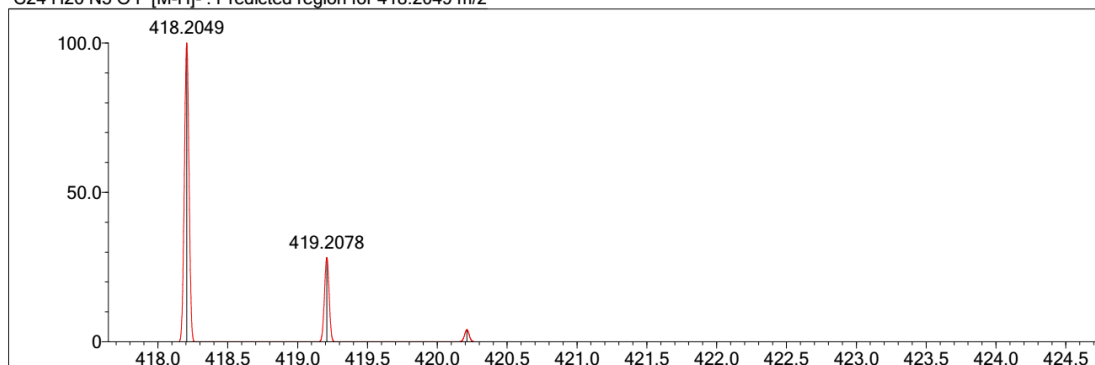

| Rank | Score | Formula (M)    | Ion    | Meas. m/z | Pred. m/z | Df. (mDa) | Df. (ppm) | Iso   | DBE  |
|------|-------|----------------|--------|-----------|-----------|-----------|-----------|-------|------|
| 1    | 85.31 | C24 H26 N5 O F | [M-H]- | 418.2045  | 418.2049  | -0.4      | -0.96     | 85.31 | 14.0 |

| Elmt | Val. | Min | Max | Elmt | Val. | Min | Max | Elmt | Val. | Min | Max | Use Adduct |
|------|------|-----|-----|------|------|-----|-----|------|------|-----|-----|------------|
| H    | 1    | 0   | 51  | O    | 2    | 0   | 5   | Br   | 1    | 0   | 0   | H          |
| 2H   | 1    | 0   | 0   | F    | 1    | 0   | 5   | Pd   | 2    | 0   | 0   |            |
| B    | 3    | 0   | 0   | P    | 3    | 0   | 0   | I    | 3    | 0   | 0   |            |
| C    | 4    | 0   | 40  | S    | 2    | 0   | 0   |      |      |     |     |            |
| N    | 3    | 1   | 10  | Cl   | 1    | 0   | 0   |      |      |     |     |            |

Error Margin (ppm): 20  
 HC Ratio: unlimited  
 Max Isotopes: all  
 MSn Iso RI (%): 75.00

DBE Range: -2.0 - 200.0  
 Apply N Rule: no  
 Isotope RI (%): 1.00  
 MSn Logic Mode: AND

Electron Ions: both  
 Use MSn Info: no  
 Isotope Res: 10000  
 Max Results: 500

Event#: 2 MS(E-) Ret. Time : 0.960 Scan#: 146

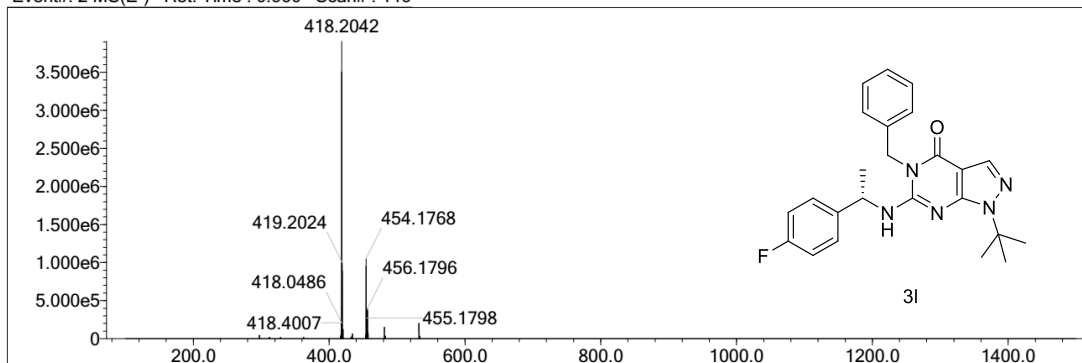

Measured region for 418.2042 m/z

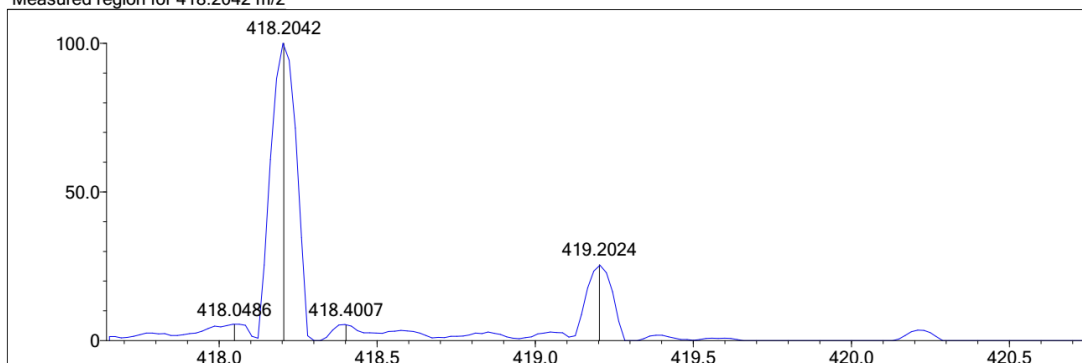

C24 H26 N5 O F [M-H]-: Predicted region for 418.2049 m/z

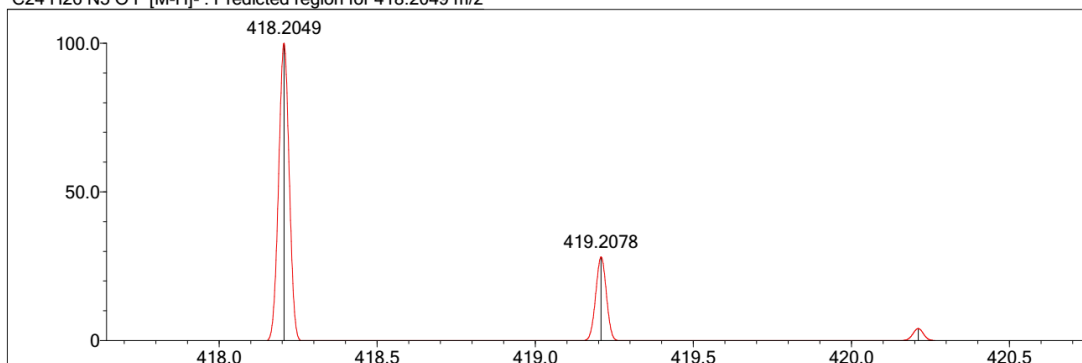

| Rank | Score | Formula (M)    | Ion    | Meas. m/z | Pred. m/z | Df. (mDa) | Df. (ppm) | Iso   | DBE  |
|------|-------|----------------|--------|-----------|-----------|-----------|-----------|-------|------|
| 3    | 87.64 | C24 H26 N5 O F | [M-H]- | 418.2042  | 418.2049  | -0.7      | -1.67     | 89.13 | 14.0 |

| Elmt | Val. | Min | Max | Elmt | Val. | Min | Max | Elmt | Val. | Min | Max | Use Adduct |
|------|------|-----|-----|------|------|-----|-----|------|------|-----|-----|------------|
| H    | 1    | 0   | 51  | O    | 2    | 0   | 5   | Br   | 1    | 0   | 0   | H          |
| 2H   | 1    | 0   | 0   | F    | 1    | 0   | 5   | Pd   | 2    | 0   | 0   |            |
| B    | 3    | 0   | 0   | P    | 3    | 0   | 0   | I    | 3    | 0   | 0   |            |
| C    | 4    | 0   | 40  | S    | 2    | 0   | 0   |      |      |     |     |            |
| N    | 3    | 1   | 10  | Cl   | 1    | 0   | 5   |      |      |     |     |            |

Error Margin (ppm): 20

HC Ratio: unlimited

Max Isotopes: all

MSn Iso RI (%): 75.00

DBE Range: -2.0 - 200.0

Apply N Rule: no

Isotope RI (%): 1.00

MSn Logic Mode: AND

Electron Ions: both

Use MSn Info: no

Isotope Res: 10000

Max Results: 500

Event#: 2 MS(E-) Ret. Time : 1.453 Scan#: 220

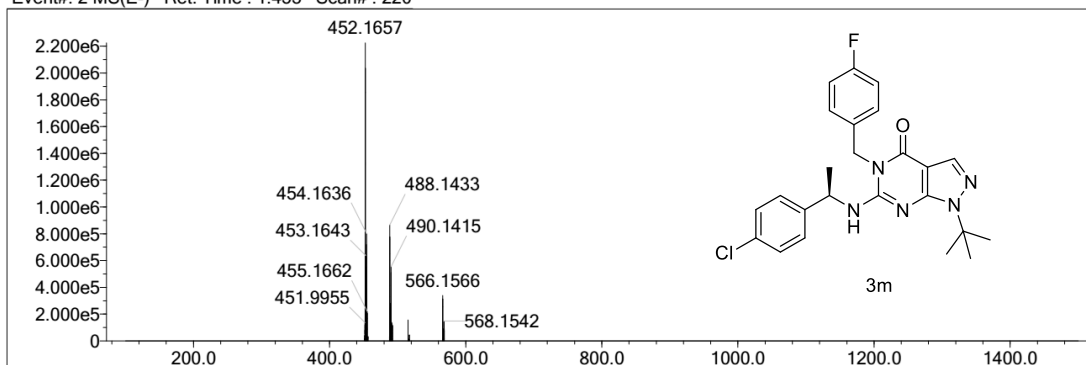

Measured region for 452.1657 m/z

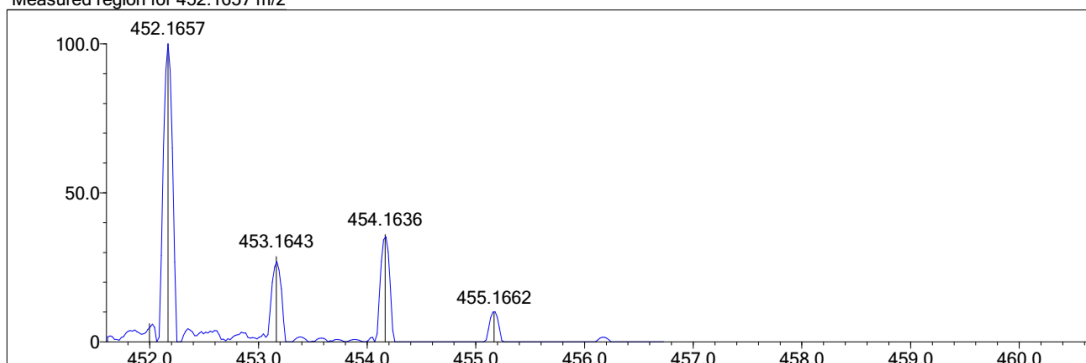

C24 H25 N5 O F Cl [M-H]- : Predicted region for 452.1659 m/z

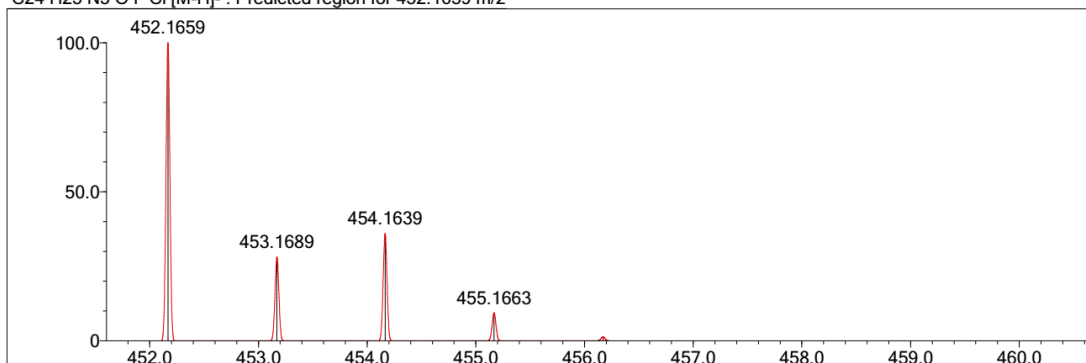

| Rank | Score | Formula (M)       | Ion    | Meas. m/z | Pred. m/z | Df. (mDa) | Df. (ppm) | Iso   | DBE  |
|------|-------|-------------------|--------|-----------|-----------|-----------|-----------|-------|------|
| 1    | 99.96 | C24 H25 N5 O F Cl | [M-H]- | 452.1657  | 452.1659  | -0.2      | -0.44     | 99.96 | 14.0 |

| Elmt | Val. | Min | Max | Elmt | Val. | Min | Max | Elmt | Val. | Min | Max | Use Adduct |
|------|------|-----|-----|------|------|-----|-----|------|------|-----|-----|------------|
| H    | 1    | 0   | 30  | N    | 3    | 0   | 10  | S    | 2    | 0   | 0   | H          |
| 2H   | 1    | 0   | 0   | O    | 2    | 0   | 5   | Cl   | 1    | 1   | 5   | HCOO       |
| B    | 3    | 0   | 0   | F    | 1    | 0   | 0   | Br   | 1    | 0   | 0   | CH3COO     |
| C    | 4    | 0   | 30  | P    | 3    | 0   | 0   | Pd   | 2    | 0   | 0   | Cl         |

Error Margin (ppm): 100  
 HC Ratio: unlimited  
 Max Isotopes: all  
 MSn Iso RI (%): 75.00

DBE Range: -2.0 - 200.0  
 Apply N Rule: no  
 Isotope RI (%): 1.00  
 MSn Logic Mode: AND

Electron Ions: both  
 Use MSn Info: no  
 Isotope Res: 10000  
 Max Results: 500

Event#: 2 MS(E-) Ret. Time : 1.027 Scan#: 156

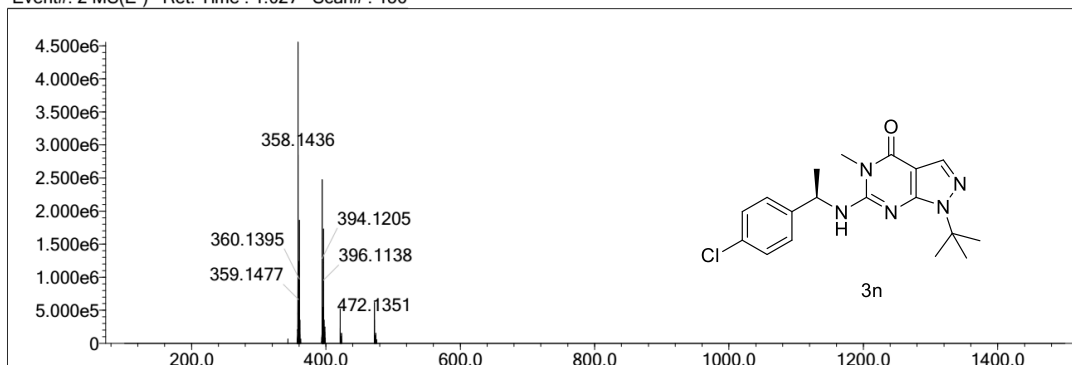

Measured region for 358.1436 m/z

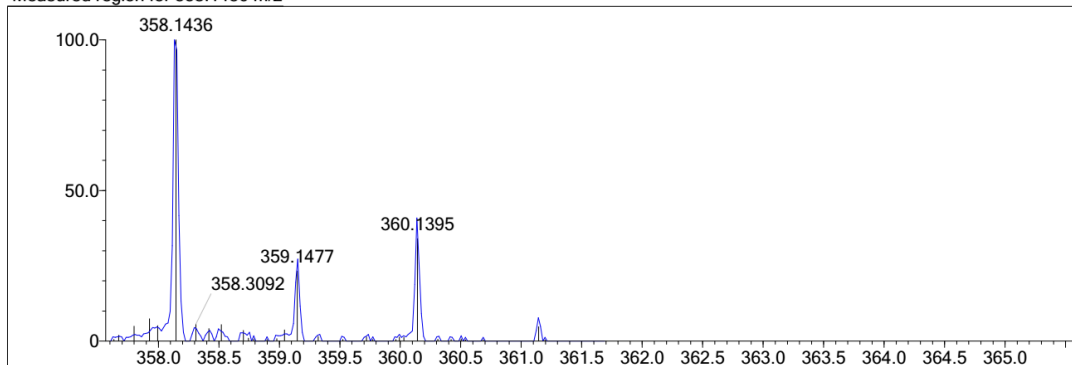

C18 H22 N5 O Cl [M-H]- : Predicted region for 358.1440 m/z

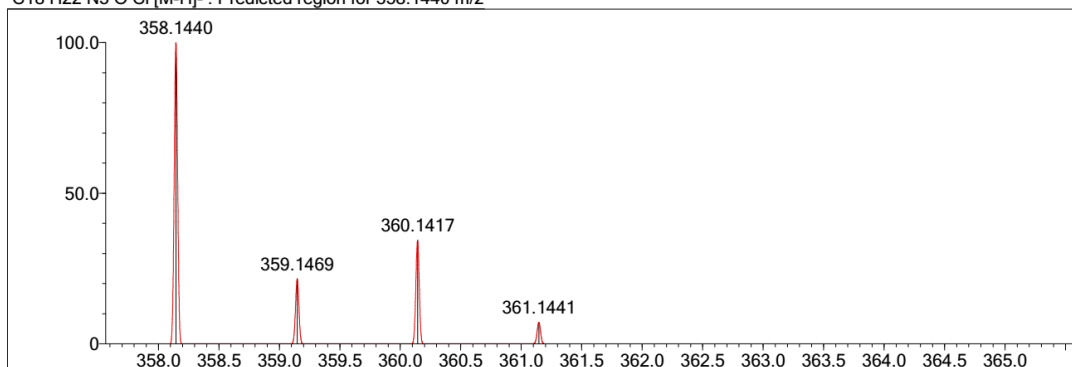

| Rank | Score | Formula (M)     | Ion    | Meas. m/z | Pred. m/z | Df. (mDa) | Df. (ppm) | Iso   | DBE  |
|------|-------|-----------------|--------|-----------|-----------|-----------|-----------|-------|------|
| 1    | 97.56 | C18 H22 N5 O Cl | [M-H]- | 358.1436  | 358.1440  | -0.4      | -1.12     | 97.85 | 10.0 |



| Elmt | Val. | Min | Max | Elmt | Val. | Min | Max | Elmt | Val. | Min | Max | Use Adduct |
|------|------|-----|-----|------|------|-----|-----|------|------|-----|-----|------------|
| H    | 1    | 26  | 26  | F    | 1    | 0   | 0   | Se   | 2    | 0   | 0   | H          |
| 2H   | 1    | 0   | 0   | Si   | 4    | 0   | 0   | Br   | 1    | 0   | 0   | Na         |
| B    | 3    | 0   | 0   | P    | 3    | 0   | 0   | Pd   | 2    | 0   | 0   |            |
| C    | 4    | 25  | 25  | S    | 2    | 0   | 0   | I    | 3    | 0   | 0   |            |
| N    | 3    | 5   | 5   | Cl   | 1    | 1   | 1   | Pt   | 2    | 0   | 0   |            |
| O    | 2    | 3   | 5   | K    | 1    | 0   | 0   |      |      |     |     |            |

Error Margin (ppm): 100  
 HC Ratio: unlimited  
 Max Isotopes: all  
 MSn Iso RI (%): 75.00

DBE Range: not fixed  
 Apply N Rule: yes  
 Isotope RI (%): 1.00  
 MSn Logic Mode: AND

Electron Ions: both  
 Use MSn Info: no  
 Isotope Res: 10000  
 Max Results: 50

Event#: 1 MS(E+) Ret. Time : 0.520 Scan#: 79

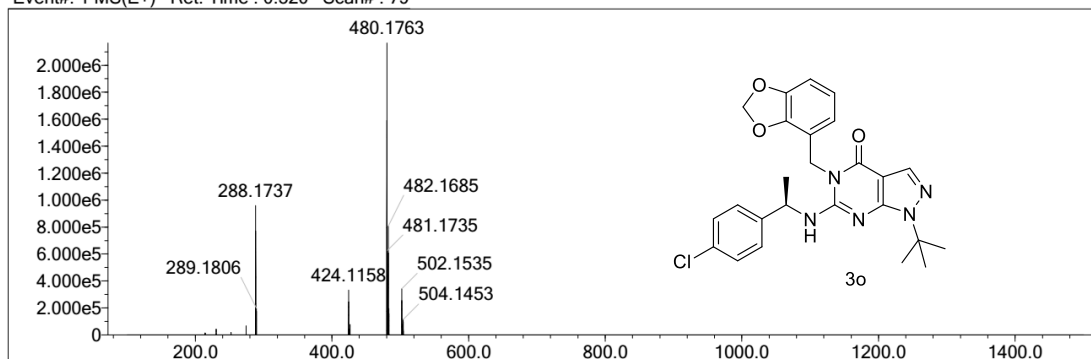

Measured region for 480.1763 m/z

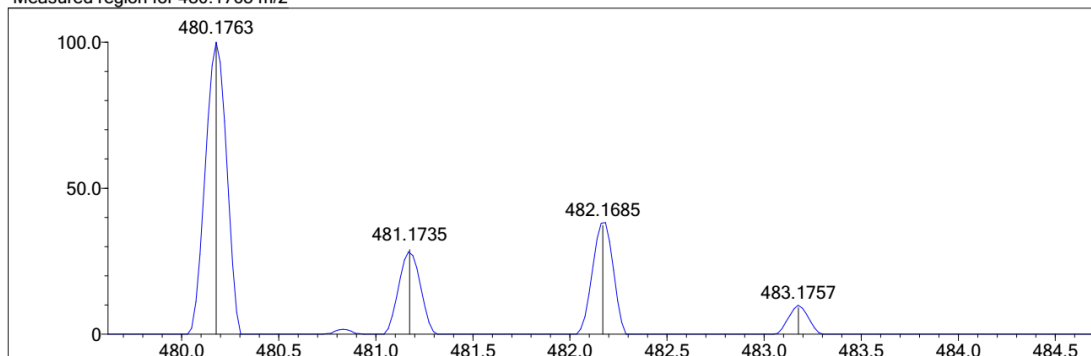

C25 H26 N5 O3 Cl [M+H]<sup>+</sup> : Predicted region for 480.1797 m/z

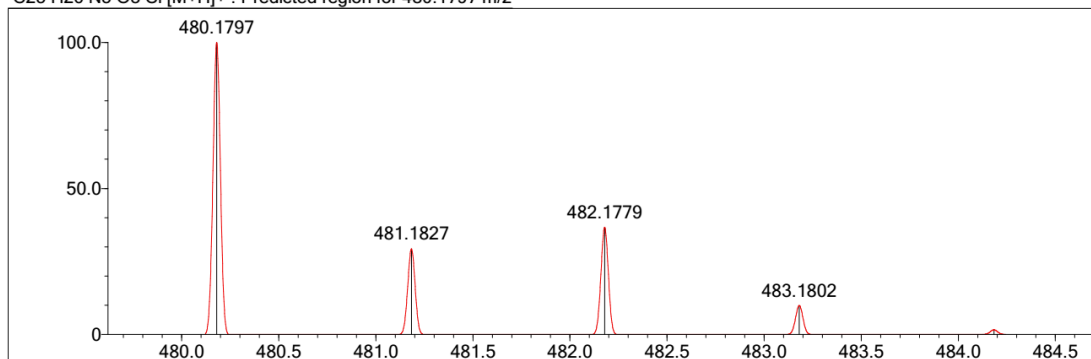

| Rank | Score | Formula (M)      | Ion                | Meas. m/z | Pred. m/z | Df. (mDa) | Df. (ppm) | Iso   | DBE  |
|------|-------|------------------|--------------------|-----------|-----------|-----------|-----------|-------|------|
| 1    | 61.18 | C25 H26 N5 O3 Cl | [M+H] <sup>+</sup> | 480.1763  | 480.1797  | -3.4      | -7.08     | 88.41 | 15.0 |

| Elmt | Val. | Min | Max | Elmt | Val. | Min | Max | Elmt | Val. | Min | Max | Use Adduct |
|------|------|-----|-----|------|------|-----|-----|------|------|-----|-----|------------|
| H    | 1    | 0   | 26  | O    | 2    | 0   | 1   | Se   | 2    | 0   | 0   | H          |
| 2H   | 1    | 0   | 0   | F    | 1    | 0   | 1   | Br   | 1    | 0   | 0   | Na         |
| B    | 3    | 0   | 0   | P    | 3    | 0   | 0   | Pt   | 2    | 0   | 0   |            |
| C    | 4    | 0   | 25  | S    | 2    | 0   | 0   |      |      |     |     |            |
| N    | 3    | 0   | 6   | Cl   | 1    | 0   | 0   |      |      |     |     |            |

Error Margin (ppm): 20

HC Ratio: unlimited

Max Isotopes: all

MSn Iso RI (%): 75.00

DBE Range: not fixed

Apply N Rule: no

Isotope RI (%): 1.00

MSn Logic Mode: AND

Electron Ions: both

Use MSn Info: no

Isotope Res: 10000

Max Results: 200

Event#: 1 MS(E+) Ret. Time : 2.347 Scan#: 353

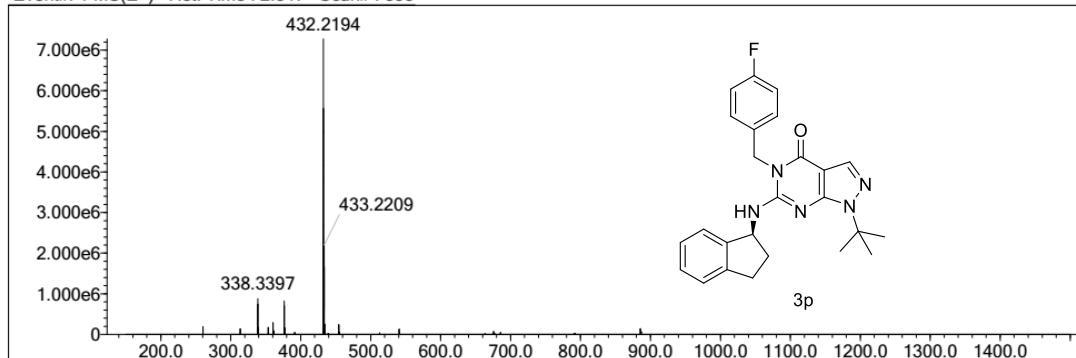

Measured region for 432.2194 m/z

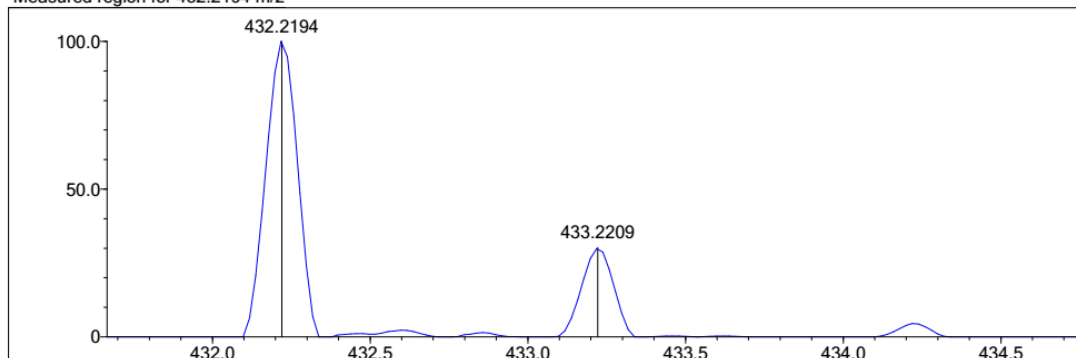

C25 H26 N5 O F [M+H]<sup>+</sup> : Predicted region for 432.2194 m/z

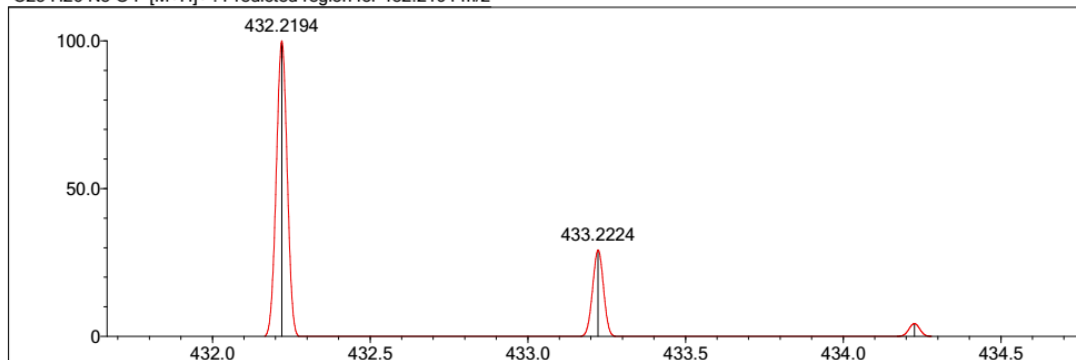

| Rank | Score | Formula (M)    | Ion                | Meas. m/z | Pred. m/z | Df. (mDa) | Df. (ppm) | Iso   | DBE  |
|------|-------|----------------|--------------------|-----------|-----------|-----------|-----------|-------|------|
| 1    | 81.65 | C25 H26 N5 O F | [M+H] <sup>+</sup> | 432.2194  | 432.2194  | -0.0      | 0.00      | 81.65 | 15.0 |

| Elmt | Val. | Min | Max | Elmt | Val. | Min | Max | Elmt | Val. | Min | Max | Use Adduct |
|------|------|-----|-----|------|------|-----|-----|------|------|-----|-----|------------|
| H    | 1    | 0   | 26  | O    | 2    | 0   | 1   | Se   | 2    | 0   | 0   | H          |
| 2H   | 1    | 0   | 0   | F    | 1    | 0   | 1   | Br   | 1    | 0   | 0   | Na         |
| B    | 3    | 0   | 0   | P    | 3    | 0   | 0   | Pt   | 2    | 0   | 0   |            |
| C    | 4    | 0   | 25  | S    | 2    | 0   | 0   |      |      |     |     |            |
| N    | 3    | 0   | 6   | Cl   | 1    | 0   | 0   |      |      |     |     |            |

Error Margin (ppm): 20  
 HC Ratio: unlimited  
 Max Isotopes: all  
 MSn Iso RI (%): 75.00

DBE Range: not fixed  
 Apply N Rule: no  
 Isotope RI (%): 1.00  
 MSn Logic Mode: AND

Electron Ions: both  
 Use MSn Info: no  
 Isotope Res: 10000  
 Max Results: 200

Event#: 1 MS(E+) Ret. Time : 2.320 Scan#: 349

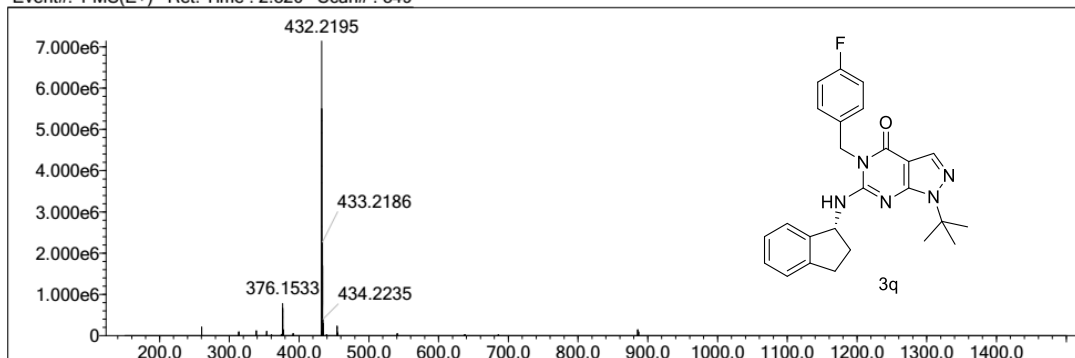

Measured region for 432.2195 m/z

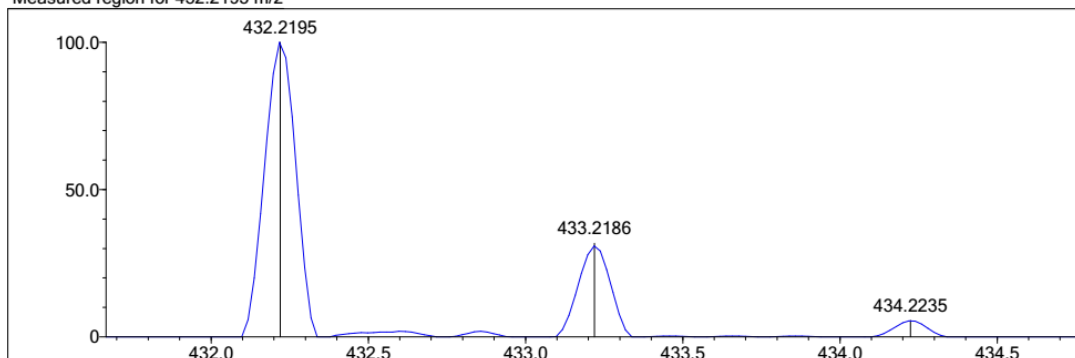

C25 H26 N5 O F [M+H]<sup>+</sup> : Predicted region for 432.2194 m/z

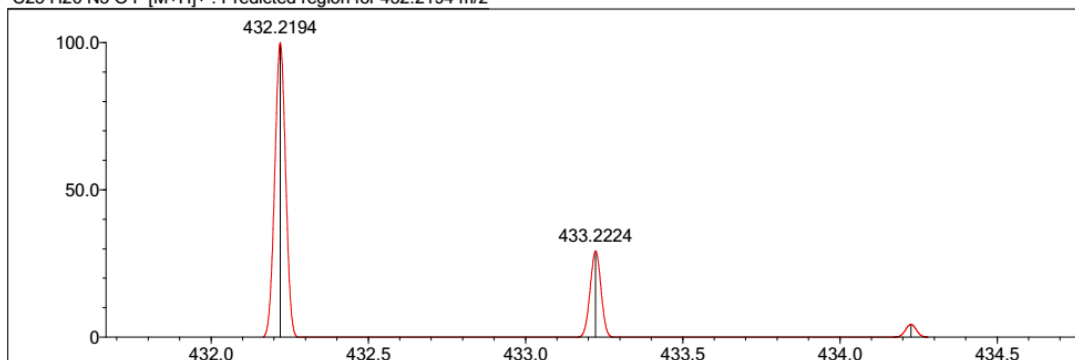

| Rank | Score | Formula (M)    | Ion                | Meas. m/z | Pred. m/z | Df. (mDa) | Df. (ppm) | Iso   | DBE  |
|------|-------|----------------|--------------------|-----------|-----------|-----------|-----------|-------|------|
| 1    | 81.37 | C25 H26 N5 O F | [M+H] <sup>+</sup> | 432.2195  | 432.2194  | 0.1       | 0.23      | 81.37 | 15.0 |

| Elmt | Val. | Min | Max | Elmt | Val. | Min | Max | Elmt | Val. | Min | Max | Use Adduct |
|------|------|-----|-----|------|------|-----|-----|------|------|-----|-----|------------|
| H    | 1    | 0   | 30  | O    | 2    | 0   | 1   | Se   | 2    | 0   | 0   | H          |
| 2H   | 1    | 0   | 0   | F    | 1    | 0   | 1   | Br   | 1    | 0   | 0   | Na         |
| B    | 3    | 0   | 0   | P    | 3    | 0   | 0   | Pt   | 2    | 0   | 0   |            |
| C    | 4    | 0   | 26  | S    | 2    | 0   | 0   |      |      |     |     |            |
| N    | 3    | 0   | 5   | Cl   | 1    | 0   | 0   |      |      |     |     |            |

Error Margin (ppm): 100  
 HC Ratio: unlimited  
 Max Isotopes: all  
 MSn Iso RI (%): 75.00

DBE Range: not fixed  
 Apply N Rule: no  
 Isotope RI (%): 1.00  
 MSn Logic Mode: AND

Electron Ions: both  
 Use MSn Info: no  
 Isotope Res: 10000  
 Max Results: 200

Event#: 1 MS(E+) Ret. Time : 2.000 Scan#: 301

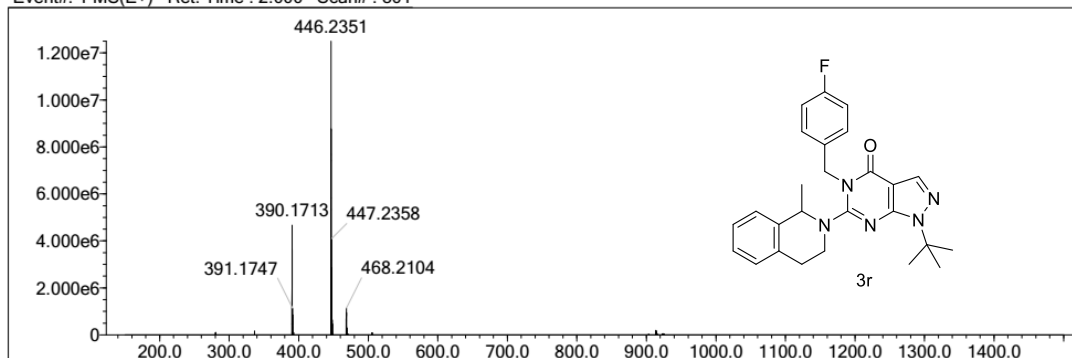

Measured region for 446.2351 m/z

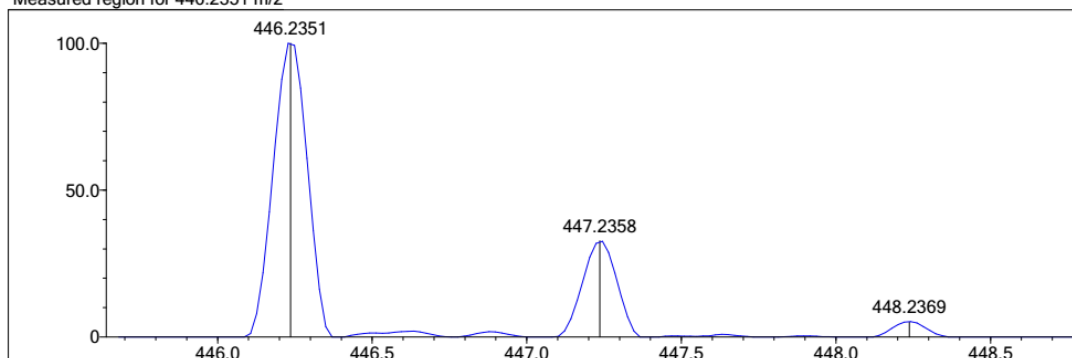

C26 H28 N5 O F [M+H]<sup>+</sup> : Predicted region for 446.2351 m/z

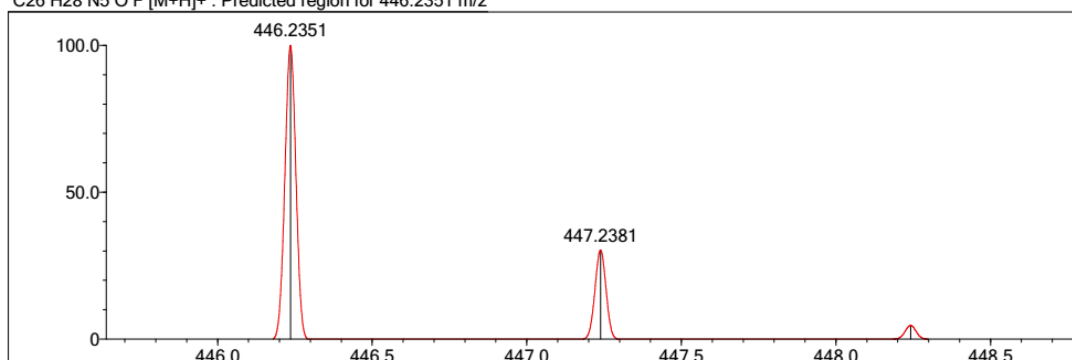

| Rank | Score | Formula (M)    | Ion                | Meas. m/z | Pred. m/z | Df. (mDa) | Df. (ppm) | Iso   | DBE  |
|------|-------|----------------|--------------------|-----------|-----------|-----------|-----------|-------|------|
| 1    | 73.81 | C26 H28 N5 O F | [M+H] <sup>+</sup> | 446.2351  | 446.2351  | 0.0       | 0.00      | 73.81 | 15.0 |

## 10. The purity spectrums of the target compounds.

Compound **2**: UV detection at 254nm; elution, MeOH (100%); T = 25°C; Flow rate = 1.0 mL/min.

Purity: 99.3%

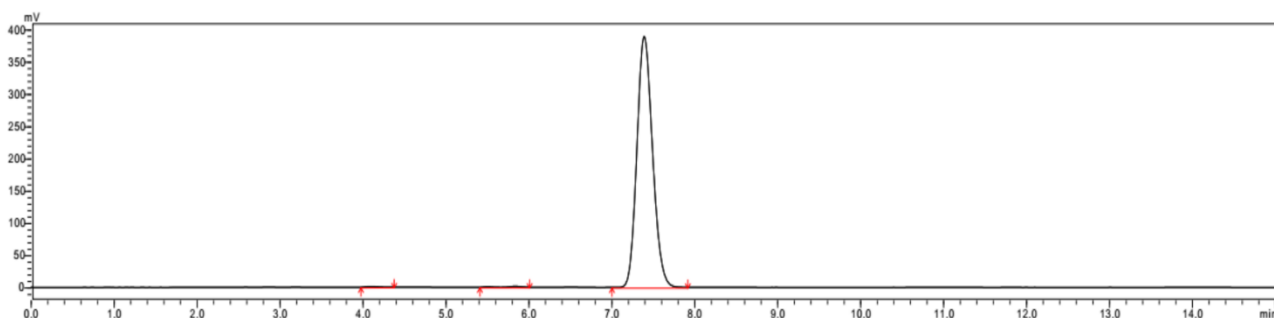

| Peak     | Retention time | Peak area | Peak height | Peak area % |
|----------|----------------|-----------|-------------|-------------|
| 1        | 4.093          | 13178     | 1267        | 0.255       |
| 2        | 5.844          | 22702     | 1481        | 0.44        |
| 3        | 7.396          | 5128863   | 388990      | 99.305      |
| In total |                | 5164743   | 391739      | 100         |

Compound **3a**: UV detection at 254nm; elution, MeOH (100%); T = 25°C; Flow rate = 1.0 mL/min.

Purity: 99.6%

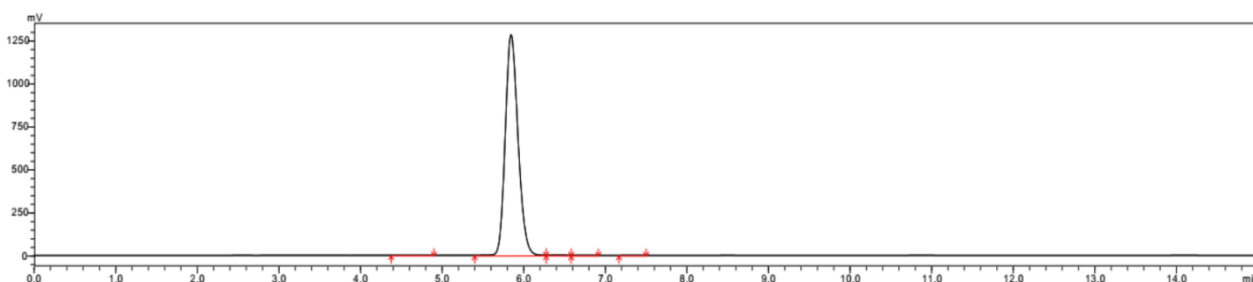

| Peak     | Retention time | Peak area | Peak height | Peak area % |
|----------|----------------|-----------|-------------|-------------|
| 1        | 4.544          | 12325     | 692         | 0.088       |
| 2        | 5.851          | 13927662  | 1283948     | 99.605      |
| 3        | 6.427          | 23056     | 1744        | 0.165       |
| 4        | 6.769          | 11668     | 771         | 0.083       |
| 5        | 7.366          | 8219      | 702         | 0.059       |
| In total |                | 13982930  | 1287858     | 100         |

Compound **3d** : UV detection at 254 nm; elution, MeOH (100%); T = 25°C; Flow rate = 1.0 mL/min.

Purity: 99.7%

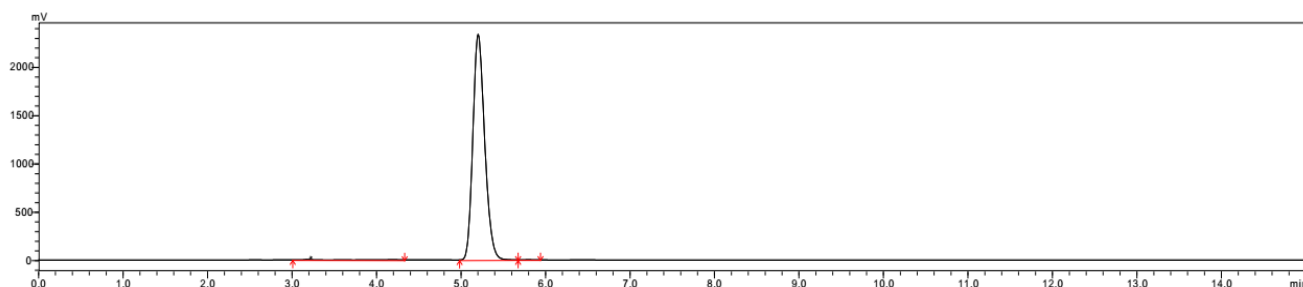

| Peak     | Retention time | Peak area | Peak height | Peak area % |
|----------|----------------|-----------|-------------|-------------|
| 1        | 5.2            | 40996     | 1939        | 0.293       |
| 2        | 5.667          | 13964068  | 1300242     | 99.707      |
| In total |                | 14005065  | 1302181     | 100         |

Compound **3e** : UV detection at 254 nm; elution, MeOH (100%); T = 25°C; Flow rate = 1.0 mL/min.

Purity: 99.7%

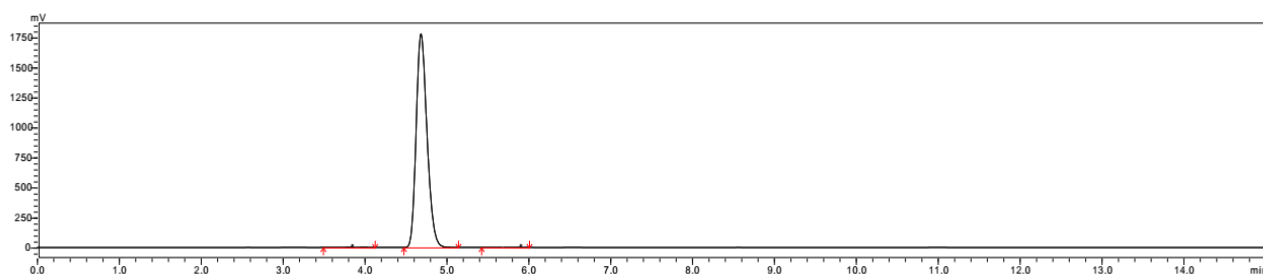

| Peak     | Retention time | Peak area | Peak height | Peak area % |
|----------|----------------|-----------|-------------|-------------|
| 1        | 3.813          | 38101     | 2109        | 0.231       |
| 2        | 4.689          | 16406837  | 1778960     | 99.677      |
| 3        | 5.868          | 15122     | 1360        | 0.092       |
| In total |                | 16460061  | 1782428     | 100         |

Compound **3g** : UV detection at 254 nm; elution, MeOH (100%); T = 25°C; Flow rate = 1.0 mL/min.

Purity: 99.8%

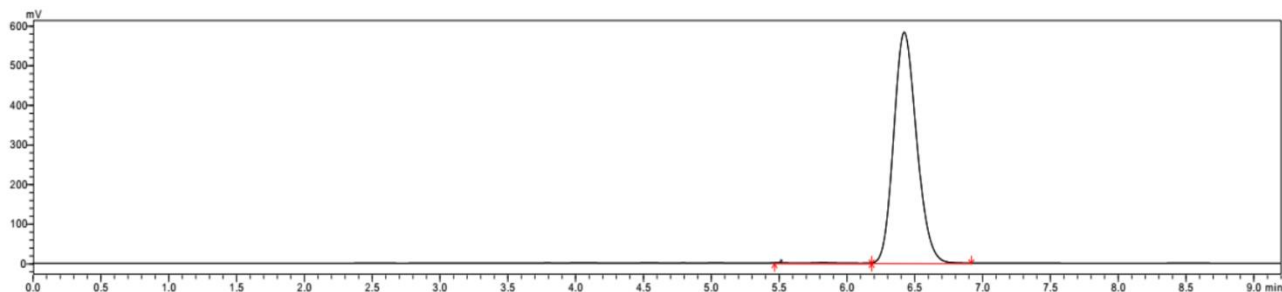

| Peak     | Retention time | Peak area | Peak height | Peak area % |
|----------|----------------|-----------|-------------|-------------|
| 1        | 5.495          | 15330     | 784         | 0.223       |
| 2        | 6.426          | 6855450   | 582573      | 99.777      |
| In total |                | 6870779   | 583357      | 100         |

Compound **3h** : UV detection at 254 nm; elution, MeOH (100%); T = 25°C; Flow rate = 1.0 mL/min.

Purity: 99.4%

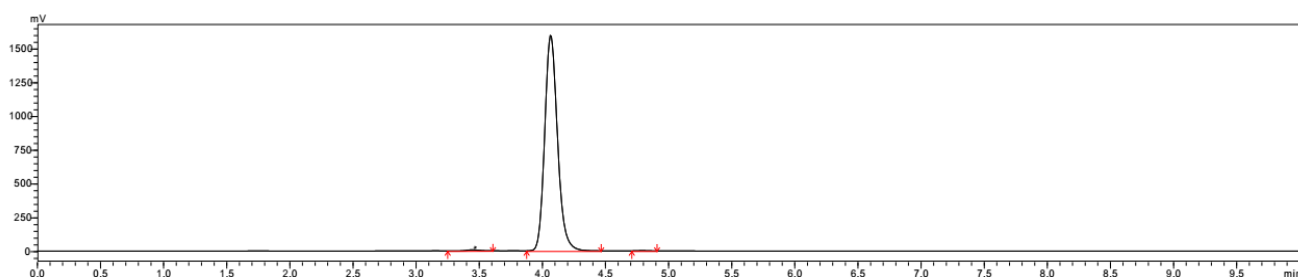

| Peak     | Retention time | Peak area | Peak height | Peak area % |
|----------|----------------|-----------|-------------|-------------|
| 1        | 3.445          | 52224     | 7289        | 0.46        |
| 2        | 4.07           | 11295035  | 1595970     | 99.403      |
| 3        | 4.795          | 15577     | 2264        | 0.137       |
| In total |                | 11362836  | 1605523     | 100         |

Compound **3k** : UV detection at 254 nm; elution, MeOH (100%); T = 25°C; Flow rate = 1.0 mL/min.

Purity: 99.7%

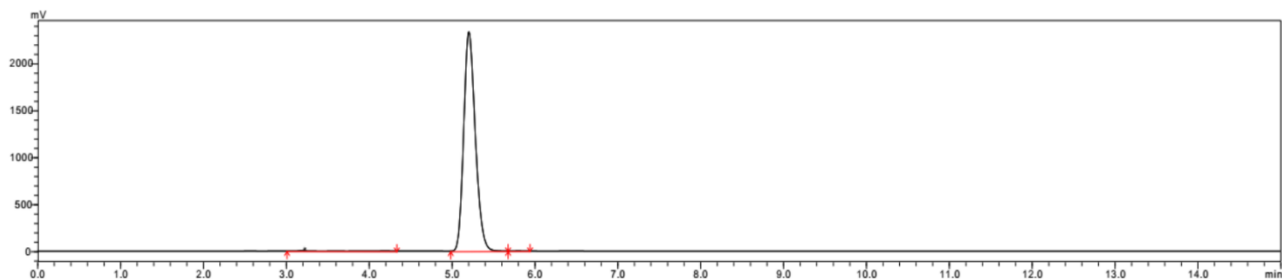

| Peak     | Retention time | Peak area | Peak height | Peak area % |
|----------|----------------|-----------|-------------|-------------|
| 1        | 3.19           | 58088     | 4230        | 0.254       |
| 2        | 5.209          | 22762820  | 2336323     | 99.671      |
| 3        | 5.804          | 17013     | 1723        | 0.074       |
| In total |                | 22837921  | 2342276     | 100         |

Compound **3l** : UV detection at 254 nm; elution, MeOH (100%); T = 25°C; Flow rate = 1.0 mL/min.

Purity: 99.8%

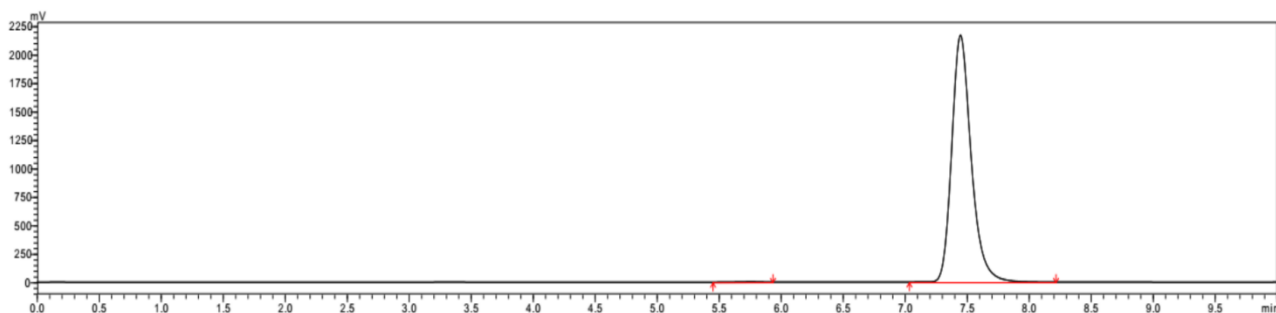

| Peak     | Retention time | Peak area | Peak height | Peak area % |
|----------|----------------|-----------|-------------|-------------|
| 1        | 5.757          | 48562     | 3721        | 0.205       |
| 2        | 7.45           | 23665138  | 2170088     | 99.795      |
| In total |                | 23713700  | 2173809     | 100         |



Compound **3m** : UV detection at 254 nm; elution, MeOH (100%); T = 25°C; Flow rate = 1.0 mL/min.

Purity: 99.4%

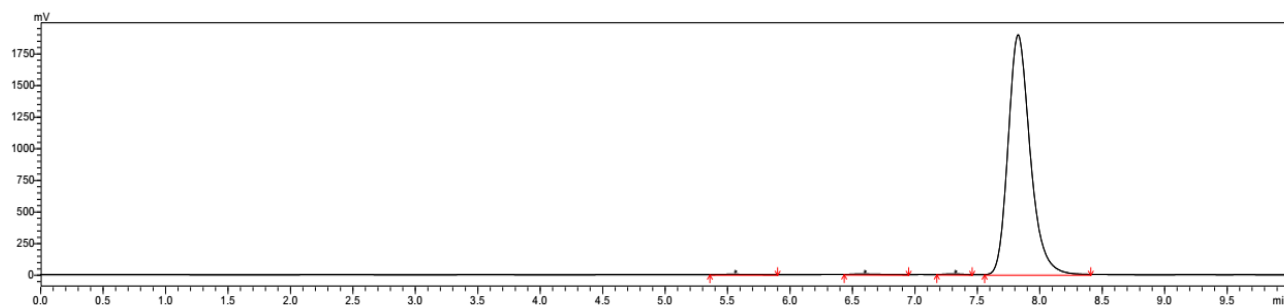

| Peak     | Retention time | Peak area | Peak height | Peak area % |
|----------|----------------|-----------|-------------|-------------|
| 1        | 5.543          | 57660     | 2837        | 0.245       |
| 2        | 6.577          | 53246     | 3599        | 0.227       |
| 3        | 7.305          | 35769     | 4075        | 0.152       |
| 4        | 7.83           | 23344962  | 1895904     | 99.376      |
| In total |                | 23491636  | 1906415     | 100         |

## 11. Reference

- (1) Wu, D.; Zhang, T.; Chen, Y.; Huang, Y.; Geng, H.; Yu, Y.; Zhang, C.; Lai, Z.; Wu, Y.; Guo, X.; Chen, J.; Luo, H.-B. Discovery and Optimization of Chromeno[2,3-c]pyrrol-9(2H)-ones as Novel Selective and Orally Bioavailable Phosphodiesterase 5 Inhibitors for the Treatment of Pulmonary Arterial Hypertension. *J. Med. Chem.* **2017**, *60*, 6622-6637.
- (2) Huang, M.; Shao, Y.; Hou, J.; Cui, W.; Liang, B.; Huang, Y.; Li, Z.; Wu, Y.; Zhu, X.; Liu, P.; Wan, Y.; Ke, H.; Luo, H. B., Structural Asymmetry of Phosphodiesterase-9A and a Unique Pocket for Selective Binding of a Potent Enantiomeric Inhibitor. *Mol. Pharmacol.* **2015**, *88*, 836-845.
- (3) Dyck, B.; Branstetter, B.; Gharbaoui, T.; Hudson, A. R.; Breitenbucher, J. G.; Gomez, L.; Botrous, I.; Marrone, T.; Barido, R.; Allerston, C. K.; Cedervall, E. P.; Xu, R.; Sridhar, V.; Barker, R.; Aertgeerts, K.; Schmelzer, K.; Neul, D.; Lee, D.; Massari, M. E.; Andersen, C. B.; Sebring, K.; Zhou, X.; Petroski, R.; Limberis, J.; Augustin, M.; Chun, L. E.; Edwards, T. E.; Peters, M.; Tabatabaei, A., Discovery of Selective Phosphodiesterase 1 Inhibitors with Memory Enhancing Properties. *J. Med. Chem.* **2017**, *60*, 3472-3483.
